# Supplementary material
Source: Frontiers journal article supplement (https://www.frontiersin.org/articles/256904)
Supplement: Table_7.XLS [file Table_7.XLS]

## Sheet: O. sativa
Table S7 Conservation analysis of circRNAs by comparison with other plant circRNAs from A. thaliana, O. sativa, H. vulgare, S. lycopersicum, and Z. mays in PlantcircBase
O. sativa
#CircRNAs	circRNA_type	Parent genes	CircRNAs	circRNA_type	Parent genes	Sequence similarity for circRNAs
Ath_circ_FC0003	exon	AT1G05200	osa_circ_025010	exonic	LOC_Os04g49570	Yes
Ath_circ_FC0004	exon	AT1G05520	osa_circ_039471	exonic	LOC_Os09g28610	Yes
Ath_circ_FC0006	exon	AT1G15405	osa_circ_007562	intergenic	NA	Yes
Ath_circ_FC0007	exon	AT1G15405	osa_circ_007562	intergenic	NA	Yes
Ath_circ_FC0008	exon	AT1G15405	osa_circ_007562	intergenic	NA	Yes
Ath_circ_FC0009	exon	AT1G15405	osa_circ_007562	intergenic	NA	Yes
Ath_circ_FC0010	exon	AT1G15405	osa_circ_007562	intergenic	NA	Yes
Ath_circ_FC0011	exon	AT1G15405	osa_circ_007562	intergenic	NA	Yes
Ath_circ_FC0014	exon	AT1G16270	osa_circ_033607	exonic	LOC_Os07g25680	Yes
Ath_circ_FC0015	exon	AT1G20260	osa_circ_031211	exonic	LOC_Os06g37180	Yes
Ath_circ_FC0019	exon	AT1G64720	osa_circ_012891	exonic	LOC_Os02g03230	Yes
Ath_circ_FC0020	exon	AT1G64720	osa_circ_012891	exonic	LOC_Os02g03230	Yes
Ath_circ_FC0021	exon	AT1G68010	osa_circ_012596	exonic	LOC_Os02g01150	Yes
Ath_circ_FC0024	exon	AT1G79990	osa_circ_013794	exonic	LOC_Os02g11830	Yes
Ath_circ_FC0027	exon	AT1G80830	osa_circ_033348	exonic	LOC_Os07g15460	Yes
Ath_circ_FC0031	exon	AT2G07050	osa_circ_008744	exonic	LOC_Os11g08569	Yes
Ath_circ_FC0037	exon	AT2G32430	osa_circ_032013	exonic	LOC_Os06g46570	Yes
Ath_circ_FC0039	exon	AT2G38410	osa_circ_028227	exonic	LOC_Os05g39760	Yes
Ath_circ_FC0040	Intergenic	-	osa_circ_021538	intergenic	NA	Yes
Ath_circ_FC0041	Intergenic	-	osa_circ_021538	intergenic	NA	Yes
Ath_circ_FC0043	exon	AT2G42600	osa_circ_014062	exonic	LOC_Os02g14770	Yes
Ath_circ_FC0049	exon	AT3G49310	osa_circ_007705	exonic	LOC_Os10g37520	Yes
Ath_circ_FC0052	exon	AT3G55330	osa_circ_036829	exonic	LOC_Os08g25900	Yes
Ath_circ_FC0065	exon	AT4G38920	osa_circ_014965	exonic	LOC_Os02g34510	Yes
Ath_circ_FC0067	exon	AT5G03290	osa_circ_001304	exonic	LOC_Os01g16900	Yes
Ath_circ_FC0068	exon	AT5G04090	osa_circ_013046	exonic	LOC_Os02g04450	Yes
Ath_circ_FC0069	exon	AT5G04140	osa_circ_035119	exonic	LOC_Os07g46460	Yes
Ath_circ_FC0070	exon	AT5G04430	osa_circ_017254	exonic	LOC_Os02g57640	Yes
Ath_circ_FC0072	exon	AT5G06910	osa_circ_013638	exonic	LOC_Os02g10220	Yes
Ath_circ_FC0073	exon	AT5G09700	osa_circ_021813	exonic	LOC_Os03g53110	Yes
Ath_circ_FC0080	exon	AT5G57350	osa_circ_025748	exonic	LOC_Os04g56160	Yes
Ath_circ_FC0081	exon	AT5G60410	osa_circ_021315	exonic	LOC_Os03g50980	Yes
Ath_circ_FC0082	exon	AT5G65670	osa_circ_030742	exonic	LOC_Os06g22870	Yes
Ath_circ_FC0083	exon	ATMG00030	osa_circ_004324	intergenic	NA	Yes
Ath_circ_FC0084	exon	ATMG00030	osa_circ_004324	intergenic	NA	Yes
Ath_circ_FC0085	exon	ATMG00030	osa_circ_004324	intergenic	NA	Yes
Ath_circ_FC0086	Intergenic	-	osa_circ_004344	intergenic	NA	Yes
Ath_circ_FC0089	exon	ATCG00020	osa_circ_006520	exonic	LOC_Os10g21192	Yes
Ath_circ_FC0090	exon	ATCG00020	osa_circ_006520	exonic	LOC_Os10g21192	Yes
Ath_circ_FC0091	exon	ATCG00020	osa_circ_006520	exonic	LOC_Os10g21192	Yes
Ath_circ_FC0092	exon	ATCG00020	osa_circ_006520	exonic	LOC_Os10g21192	Yes
Ath_circ_FC0093	exon	ATCG00020	osa_circ_006520	exonic	LOC_Os10g21192	Yes
Ath_circ_FC0094	exon	ATCG00020	osa_circ_006520	exonic	LOC_Os10g21192	Yes
Ath_circ_FC0095	exon	ATCG00020	osa_circ_006520	exonic	LOC_Os10g21192	Yes
Ath_circ_FC0096	exon	ATCG00020	osa_circ_006520	exonic	LOC_Os10g21192	Yes
Ath_circ_FC0097	exon	ATCG00020	osa_circ_006520	exonic	LOC_Os10g21192	Yes
Ath_circ_FC0098	exon	ATCG00020	osa_circ_006520	exonic	LOC_Os10g21192	Yes
Ath_circ_FC0099	exon	ATCG00020	osa_circ_006520	exonic	LOC_Os10g21192	Yes
Ath_circ_FC0100	exon	ATCG00020	osa_circ_006520	exonic	LOC_Os10g21192	Yes
Ath_circ_FC0101	exon	ATCG00020	osa_circ_006520	exonic	LOC_Os10g21192	Yes
Ath_circ_FC0102	exon	ATCG00020	osa_circ_006520	exonic	LOC_Os10g21192	Yes
Ath_circ_FC0103	exon	ATCG00070	osa_circ_009052	exonic	LOC_Os11g17080	Yes
Ath_circ_FC0105	exon	ATCG00490	osa_circ_018708	exonic	LOC_Os03g12810	Yes
Ath_circ_FC0115	exon	AT1G01320	osa_circ_033569	exonic	LOC_Os07g23990	Yes
Ath_circ_FC0116	exon	AT1G01320	osa_circ_033566	exonic	LOC_Os07g23990	Yes
Ath_circ_FC0117	exon	AT1G01320	osa_circ_033566	exonic	LOC_Os07g23990	Yes
Ath_circ_FC0118	exon	AT1G01320	osa_circ_033559	exonic	LOC_Os07g23990	Yes
Ath_circ_FC0119	exon	AT1G01320	osa_circ_033558	exonic	LOC_Os07g23990	Yes
Ath_circ_FC0120	exon	AT1G01320	osa_circ_033558	exonic	LOC_Os07g23990	Yes
Ath_circ_FC0123	exon	AT1G01520	osa_circ_015974	exonic	LOC_Os02g45670	Yes
Ath_circ_FC0126	exon	AT1G01620	osa_circ_015873	exonic	LOC_Os02g44630	Yes
Ath_circ_FC0129	exon	AT1G01910	osa_circ_039893	exonic	LOC_Os09g34970	Yes
Ath_circ_FC0130	exon	AT1G01910	osa_circ_039893	exonic	LOC_Os09g34970	Yes
Ath_circ_FC0138	exon	AT1G02080	osa_circ_007964	exonic	LOC_Os10g40780	Yes
Ath_circ_FC0139	exon	AT1G02090	osa_circ_033859	exonic	LOC_Os07g30840	Yes
Ath_circ_FC0144	exon	AT1G02170	osa_circ_008040	intergenic	NA	Yes
Ath_circ_FC0150	exon	AT1G02890	osa_circ_035257	exonic	LOC_Os07g47530	Yes
Ath_circ_FC0160	exon	AT1G03860	osa_circ_033361	exonic	LOC_Os07g15880	Yes
Ath_circ_FC0162	exon	AT1G04080	osa_circ_018454	exonic	LOC_Os03g11200	Yes
Ath_circ_FC0163	exon	AT1G04200	osa_circ_004137	exonic	LOC_Os01g56630	Yes
Ath_circ_FC0169	exon	AT1G04410	osa_circ_007137	exonic	LOC_Os10g33800	Yes
Ath_circ_FC0172	exon	AT1G04680	osa_circ_022974	exonic	LOC_Os04g05050	Yes
Ath_circ_FC0174	exon	AT1G04700	osa_circ_012158	exonic	LOC_Os12g40279	Yes
Ath_circ_FC0175	Intergenic	n/a	osa_circ_033113	exonic	LOC_Os07g09600	Yes
Ath_circ_FC0176	Intergenic	n/a	osa_circ_033113	exonic	LOC_Os07g09600	Yes
Ath_circ_FC0179	exon	AT1G04950	osa_circ_001895	exonic	LOC_Os01g32750	Yes
Ath_circ_FC0180	exon	AT1G05010	osa_circ_008740	exonic	LOC_Os11g08380	Yes
Ath_circ_FC0189	exon	AT1G05520	osa_circ_039471	exonic	LOC_Os09g28610	Yes
Ath_circ_FC0190	exon	AT1G05520	osa_circ_037339	exonic	LOC_Os08g36994	Yes
Ath_circ_FC0197	exon	AT1G05830	osa_circ_038507	exonic	LOC_Os09g04890	Yes
Ath_circ_FC0202	exon	AT1G05890	osa_circ_024354	exonic	LOC_Os04g41470	Yes
Ath_circ_FC0208	exon	AT1G06070	osa_circ_010549	exonic	LOC_Os12g06520	Yes
Ath_circ_FC0210	exon	AT1G06130	osa_circ_039858	exonic	LOC_Os09g34100	Yes
Ath_circ_FC0216	exon	AT1G06680	osa_circ_011550	exonic	LOC_Os12g32230	Yes
Ath_circ_FC0217	exon	AT1G06700	osa_circ_026491	exonic	LOC_Os05g04520	Yes
Ath_circ_FC0218	exon	AT1G06700	osa_circ_022676	exonic	LOC_Os03g62700	Yes
Ath_circ_FC0220	exon	AT1G06820	osa_circ_009653	exonic	LOC_Os11g36440	Yes
Ath_circ_FC0221	exon	AT1G06840	osa_circ_005921	exonic	LOC_Os01g72990	Yes
Ath_circ_FC0222	exon	AT1G06840	osa_circ_004616	exonic	LOC_Os01g60280	Yes
Ath_circ_FC0229	exon	AT1G07360	osa_circ_029833	exonic	LOC_Os06g07350	Yes
Ath_circ_FC0230	exon	AT1G07420	osa_circ_010240	exonic	LOC_Os11g48020	Yes
Ath_circ_FC0233	exon	AT1G07705	osa_circ_016814	exonic	LOC_Os02g54120	Yes
Ath_circ_FC0240	exon	AT1G07910	osa_circ_033098	exonic	LOC_Os07g09400	Yes
Ath_circ_FC0242	exon	AT1G07990	osa_circ_002363	exonic	LOC_Os01g40340	Yes
Ath_circ_FC0244	exon	AT1G08040	osa_circ_026201	exonic	LOC_Os05g01760	Yes
Ath_circ_FC0248	exon	AT1G08420	osa_circ_020785	exonic	LOC_Os03g44500	Yes
Ath_circ_FC0252	exon	AT1G08520	osa_circ_022399	exonic	LOC_Os03g59640	Yes
Ath_circ_FC0253	exon	AT1G08520	osa_circ_022399	exonic	LOC_Os03g59640	Yes
Ath_circ_FC0258	exon	AT1G08680	osa_circ_028652	exonic	LOC_Os05g45840	Yes
Ath_circ_FC0260	exon	AT1G08970	osa_circ_013380	exonic	LOC_Os02g07450	Yes
Ath_circ_FC0265	exon	AT1G09140	osa_circ_001525	exonic	LOC_Os01g21420	Yes
Ath_circ_FC0267	exon	AT1G09160	osa_circ_001910	exonic	LOC_Os01g32964	Yes
Ath_circ_FC0268	exon	AT1G09200	osa_circ_029761	exonic	LOC_Os06g06450/LOC_Os06g06470	Yes
Ath_circ_FC0274	exon	AT1G09430	osa_circ_012009	exonic	LOC_Os12g37870	Yes
Ath_circ_FC0276	exon	AT1G09640	osa_circ_013897	exonic	LOC_Os02g12794/LOC_Os02g12800	Yes
Ath_circ_FC0280	exon	AT1G09890	osa_circ_037987	exonic	LOC_Os08g44020/LOC_Os08g44040	Yes
Ath_circ_FC0286	exon	AT1G10310	osa_circ_015047	exonic	LOC_Os02g35170	Yes
Ath_circ_FC0288	exon	AT1G10390	osa_circ_010586	exonic	LOC_Os12g06870/LOC_Os12g06890	Yes
Ath_circ_FC0289	exon	AT1G10470	osa_circ_023952	exonic	LOC_Os04g36062/LOC_Os04g36070	Yes
Ath_circ_FC0290	exon	AT1G10490	osa_circ_010633	exonic	LOC_Os12g07300	Yes
Ath_circ_FC0293	exon	AT1G10670	osa_circ_012009	exonic	LOC_Os12g37870	Yes
Ath_circ_FC0297	exon	AT1G10840	osa_circ_023551	exonic	LOC_Os04g30780	Yes
Ath_circ_FC0299	exon	AT1G10950	osa_circ_010665	exonic	LOC_Os12g07670	Yes
Ath_circ_FC0300	exon	AT1G10950	osa_circ_014985	exonic	LOC_Os02g34690	Yes
Ath_circ_FC0313	exon	AT1G11910	osa_circ_029008	exonic	LOC_Os05g49200	Yes
Ath_circ_FC0314	exon	AT1G11910	osa_circ_001390	exonic	LOC_Os01g18630	Yes
Ath_circ_FC0315	exon	AT1G11950	osa_circ_020395	exonic	LOC_Os03g31594	Yes
Ath_circ_FC0316	exon	AT1G11960	osa_circ_029226	exonic	LOC_Os05g51630	Yes
Ath_circ_FC0326	exon	AT1G12470	osa_circ_036126	exonic	LOC_Os08g08060	Yes
Ath_circ_FC0327	exon	AT1G12520	osa_circ_024961	exonic	LOC_Os04g48410	Yes
Ath_circ_FC0329	exon	AT1G12900	osa_circ_024070	exonic	LOC_Os04g38600	Yes
Ath_circ_FC0333	exon	AT1G13180	osa_circ_035725	exonic	LOC_Os08g03440	Yes
Ath_circ_FC0334	exon	AT1G13320	osa_circ_038566	exonic	LOC_Os09g07510	Yes
Ath_circ_FC0337	exon	AT1G14000	osa_circ_034902	exonic	LOC_Os07g43900	Yes
Ath_circ_FC0342	exon	AT1G14380	osa_circ_003646	exonic	LOC_Os01g51840	Yes
Ath_circ_FC0345	exon	AT1G14580	osa_circ_037994	exonic	LOC_Os08g44050	Yes
Ath_circ_FC0348	exon	AT1G14840	osa_circ_012542	exonic	LOC_Os12g44340	Yes
Ath_circ_FC0360	exon	AT1G15290	osa_circ_025608	exonic	LOC_Os04g55230	Yes
Ath_circ_FC0361	exon	AT1G15290	osa_circ_033559	exonic	LOC_Os07g23990	Yes
Ath_circ_FC0362	Intergenic	n/a	osa_circ_007562	intergenic	NA	Yes
Ath_circ_FC0363	Intergenic	n/a	osa_circ_007562	intergenic	NA	Yes
Ath_circ_FC0364	Intergenic	n/a	osa_circ_007562	intergenic	NA	Yes
Ath_circ_FC0365	Intergenic	n/a	osa_circ_007562	intergenic	NA	Yes
Ath_circ_FC0366	Intergenic	n/a	osa_circ_007562	intergenic	NA	Yes
Ath_circ_FC0367	Intergenic	n/a	osa_circ_007562	intergenic	NA	Yes
Ath_circ_FC0368	Intergenic	n/a	osa_circ_007562	intergenic	NA	Yes
Ath_circ_FC0369	Intergenic	n/a	osa_circ_007562	intergenic	NA	Yes
Ath_circ_FC0370	Intergenic	n/a	osa_circ_007562	intergenic	NA	Yes
Ath_circ_FC0371	Intergenic	n/a	osa_circ_007562	intergenic	NA	Yes
Ath_circ_FC0372	Intergenic	n/a	osa_circ_007562	intergenic	NA	Yes
Ath_circ_FC0373	Intergenic	n/a	osa_circ_007562	intergenic	NA	Yes
Ath_circ_FC0374	Intergenic	n/a	osa_circ_007562	intergenic	NA	Yes
Ath_circ_FC0375	Intergenic	n/a	osa_circ_007562	intergenic	NA	Yes
Ath_circ_FC0381	exon	AT1G15440	osa_circ_028551	exonic	LOC_Os05g44320	Yes
Ath_circ_FC0382	exon	AT1G15490	osa_circ_002899	exonic	LOC_Os01g45960	Yes
Ath_circ_FC0383	exon	AT1G15520	osa_circ_002564	exonic	LOC_Os01g42370/LOC_Os01g42380	Yes
Ath_circ_FC0386	exon	AT1G15690	osa_circ_013527	exonic	LOC_Os02g09150	Yes
Ath_circ_FC0387	exon	AT1G15750	osa_circ_036012	exonic	LOC_Os08g06480	Yes
Ath_circ_FC0388	exon	AT1G15750	osa_circ_036012	exonic	LOC_Os08g06480	Yes
Ath_circ_FC0389	exon	AT1G15750	osa_circ_018909	exonic	LOC_Os03g14980	Yes
Ath_circ_FC0410	exon	AT1G17370	osa_circ_009818	exonic	LOC_Os11g40510	Yes
Ath_circ_FC0413	exon	AT1G17580	osa_circ_014959	intergenic	NA	Yes
Ath_circ_FC0414	exon	AT1G17690	osa_circ_027264	exonic	LOC_Os05g22920	Yes
Ath_circ_FC0416	exon	AT1G17720	osa_circ_002503	exonic	LOC_Os01g41630	Yes
Ath_circ_FC0418	exon	AT1G18040	osa_circ_027773	exonic	LOC_Os05g32600	Yes
Ath_circ_FC0421	exon	AT1G18370	osa_circ_037953	exonic	LOC_Os08g43400	Yes
Ath_circ_FC0442	exon	AT1G20020	osa_circ_029344	exonic	LOC_Os06g01850	Yes
Ath_circ_FC0443	exon	AT1G20110	osa_circ_032404	exonic	LOC_Os06g50840	Yes
Ath_circ_FC0447	exon	AT1G20450	osa_circ_015910	exonic	LOC_Os02g44870	Yes
Ath_circ_FC0448	exon	AT1G20620	osa_circ_032449	exonic	LOC_Os06g51150	Yes
Ath_circ_FC0449	exon	AT1G20620	osa_circ_032449	exonic	LOC_Os06g51150	Yes
Ath_circ_FC0450	exon	AT1G20620	osa_circ_032452	exonic	LOC_Os06g51150	Yes
Ath_circ_FC0451	exon	AT1G20620	osa_circ_032452	exonic	LOC_Os06g51150	Yes
Ath_circ_FC0452	exon	AT1G20620	osa_circ_032452	exonic	LOC_Os06g51150	Yes
Ath_circ_FC0462	exon	AT1G21080	osa_circ_039686	exonic	LOC_Os09g32050	Yes
Ath_circ_FC0464	exon	AT1G21250	osa_circ_040195	exonic	LOC_Os09g38800/LOC_Os09g38840	Yes
Ath_circ_FC0466	exon	AT1G21580	osa_circ_031473	exonic	LOC_Os06g43120	Yes
Ath_circ_FC0472	exon	AT1G21730	osa_circ_023885	intergenic	NA	Yes
Ath_circ_FC0477	exon	AT1G22300	osa_circ_021208	exonic	LOC_Os03g50290	Yes
Ath_circ_FC0478	exon	AT1G22410	osa_circ_034821	exonic	LOC_Os07g42960	Yes
Ath_circ_FC0480	exon	AT1G22620	osa_circ_030068	exonic	LOC_Os06g09540	Yes
Ath_circ_FC0481	exon	AT1G22700	osa_circ_007016	exonic	LOC_Os10g32348	Yes
Ath_circ_FC0490	exon	AT1G23310	osa_circ_032586	exonic	LOC_Os07g01760	Yes
Ath_circ_FC0491	exon	AT1G23310	osa_circ_032593	exonic	LOC_Os07g01760	Yes
Ath_circ_FC0492	exon	AT1G23310	osa_circ_032593	exonic	LOC_Os07g01760	Yes
Ath_circ_FC0493	exon	AT1G23340	osa_circ_002106	exonic	LOC_Os01g36660	Yes
Ath_circ_FC0495	exon	AT1G23480	osa_circ_004035	exonic	LOC_Os01g56130	Yes
Ath_circ_FC0498	exon	AT1G24190	osa_circ_000108	exonic	LOC_Os01g01960	Yes
Ath_circ_FC0500	exon	AT1G24280	osa_circ_033449	exonic	LOC_Os07g22350	Yes
Ath_circ_FC0503	exon	AT1G24510	osa_circ_031160	exonic	LOC_Os06g36700	Yes
Ath_circ_FC0504	exon	AT1G24510	osa_circ_031160	exonic	LOC_Os06g36700	Yes
Ath_circ_FC0505	exon	AT1G24510	osa_circ_031162	exonic	LOC_Os06g36700	Yes
Ath_circ_FC0507	exon	AT1G24764	osa_circ_012542	exonic	LOC_Os12g44340	Yes
Ath_circ_FC0512	exon	AT1G25682	osa_circ_014483	exonic	LOC_Os02g21880	Yes
Ath_circ_FC0517	exon	AT1G26630	osa_circ_011551	exonic	LOC_Os12g32240	Yes
Ath_circ_FC0537	exon	AT1G28400	osa_circ_002546	exonic	LOC_Os01g42260/LOC_Os01g42270	Yes
Ath_circ_FC0540	exon	AT1G28420	osa_circ_028944	exonic	LOC_Os05g48820	Yes
Ath_circ_FC0550	Intergenic	n/a	osa_circ_003125	exonic	LOC_Os01g47460	Yes
Ath_circ_FC0551	exon	AT1G29880	osa_circ_023671	exonic	LOC_Os04g32650	Yes
Ath_circ_FC0552	exon	AT1G29890	osa_circ_029096	exonic	LOC_Os05g50510	Yes
Ath_circ_FC0554	exon	AT1G29930	osa_circ_003683	exonic	LOC_Os01g52250/LOC_Os01g52240	Yes
Ath_circ_FC0555	exon	AT1G29970	osa_circ_028972	exonic	LOC_Os05g49030	Yes
Ath_circ_FC0556	exon	AT1G29970	osa_circ_028972	exonic	LOC_Os05g49030	Yes
Ath_circ_FC0561	exon	AT1G30400	osa_circ_025336	exonic	LOC_Os04g52900	Yes
Ath_circ_FC0562	exon	AT1G30400	osa_circ_025324	exonic	LOC_Os04g52900	Yes
Ath_circ_FC0564	exon	AT1G30420	osa_circ_025321	exonic	LOC_Os04g52900	Yes
Ath_circ_FC0567	exon	AT1G30490	osa_circ_017508	exonic	LOC_Os03g01890	Yes
Ath_circ_FC0569	exon	AT1G30490	osa_circ_020749	exonic	LOC_Os03g43930	Yes
Ath_circ_FC0570	exon	AT1G30490	osa_circ_012281	exonic	LOC_Os12g41860	Yes
Ath_circ_FC0571	exon	AT1G30510	osa_circ_022145	exonic	LOC_Os03g57120	Yes
Ath_circ_FC0573	exon	AT1G30540	osa_circ_038503	exonic	LOC_Os09g04800	Yes
Ath_circ_FC0574	exon	AT1G30580	osa_circ_036289	exonic	LOC_Os08g09940	Yes
Ath_circ_FC0575	exon	AT1G30580	osa_circ_036281	exonic	LOC_Os08g09940	Yes
Ath_circ_FC0576	exon	AT1G30580	osa_circ_036281	exonic	LOC_Os08g09940	Yes
Ath_circ_FC0579	exon	AT1G30620	osa_circ_025294	exonic	LOC_Os04g52730	Yes
Ath_circ_FC0580	exon	AT1G30640	osa_circ_028483	exonic	LOC_Os05g43570	Yes
Ath_circ_FC0582	exon	AT1G30820	osa_circ_029040	exonic	LOC_Os05g49770	Yes
Ath_circ_FC0584	exon	AT1G31070	osa_circ_025204	exonic	LOC_Os04g52370	Yes
Ath_circ_FC0586	exon	AT1G31230	osa_circ_038754	exonic	LOC_Os09g12290	Yes
Ath_circ_FC0591	exon	AT1G31360	osa_circ_010252	exonic	LOC_Os11g48090	Yes
Ath_circ_FC0596	exon	AT1G32060	osa_circ_016063	exonic	LOC_Os02g47020	Yes
Ath_circ_FC0597	exon	AT1G32090	osa_circ_029226	exonic	LOC_Os05g51630	Yes
Ath_circ_FC0599	exon	AT1G32220	osa_circ_023724	exonic	LOC_Os04g33060	Yes
Ath_circ_FC0601	exon	AT1G32330	osa_circ_022778	exonic	LOC_Os03g63750	Yes
Ath_circ_FC0606	exon	AT1G32900	osa_circ_033499	exonic	LOC_Os07g22930	Yes
Ath_circ_FC0607	exon	AT1G33080	osa_circ_003318	exonic	LOC_Os01g49120	Yes
Ath_circ_FC0608	exon	AT1G33360	osa_circ_015075	exonic	LOC_Os02g35630	Yes
Ath_circ_FC0623	exon	AT1G34210	osa_circ_024052	exonic	LOC_Os04g38480	Yes
Ath_circ_FC0630	exon	AT1G36160	osa_circ_027283	exonic	LOC_Os05g22940	Yes
Ath_circ_FC0631	exon	AT1G36160	osa_circ_027274	exonic	LOC_Os05g22940	Yes
Ath_circ_FC0648	exon	AT1G42970	osa_circ_017762	exonic	LOC_Os03g03720	Yes
Ath_circ_FC0650	exon	AT1G43170	osa_circ_010605	exonic	LOC_Os12g07010	Yes
Ath_circ_FC0651	exon	AT1G43170	osa_circ_010606	exonic	LOC_Os12g07010	Yes
Ath_circ_FC0653	exon	AT1G43850	osa_circ_008800	exonic	LOC_Os11g10060/LOC_Os11g10070	Yes
Ath_circ_FC0658	exon	AT1G44446	osa_circ_008062	exonic	LOC_Os10g41780	Yes
Ath_circ_FC0666	exon	AT1G47128	osa_circ_025669	exonic	LOC_Os04g55650	Yes
Ath_circ_FC0667	exon	AT1G47128	osa_circ_025672	exonic	LOC_Os04g55650	Yes
Ath_circ_FC0668	exon	AT1G47128	osa_circ_025672	exonic	LOC_Os04g55650	Yes
Ath_circ_FC0672	exon	AT1G47420	osa_circ_023801	exonic	LOC_Os04g34100	Yes
Ath_circ_FC0673	exon	AT1G47420	osa_circ_023801	exonic	LOC_Os04g34100	Yes
Ath_circ_FC0675	exon	AT1G47490	osa_circ_039477	exonic	LOC_Os09g28810	Yes
Ath_circ_FC0676	exon	AT1G47490	osa_circ_039477	exonic	LOC_Os09g28810	Yes
Ath_circ_FC0688	exon	AT1G48090	osa_circ_014653	exonic	LOC_Os02g27130	Yes
Ath_circ_FC0693	exon	AT1G48410	osa_circ_024912	exonic	LOC_Os04g47870	Yes
Ath_circ_FC0694	exon	AT1G48410	osa_circ_015932	exonic	LOC_Os02g45070	Yes
Ath_circ_FC0695	exon	AT1G48410	osa_circ_015936	exonic	LOC_Os02g45070	Yes
Ath_circ_FC0696	exon	AT1G48420	osa_circ_016722	exonic	LOC_Os02g53330	Yes
Ath_circ_FC0697	exon	AT1G48430	osa_circ_021327	exonic	LOC_Os03g51000	Yes
Ath_circ_FC0698	exon	AT1G48430	osa_circ_021335	exonic	LOC_Os03g51000	Yes
Ath_circ_FC0699	exon	AT1G48430	osa_circ_021334	exonic	LOC_Os03g51000	Yes
Ath_circ_FC0706	exon	AT1G48830	osa_circ_019368	exonic	LOC_Os03g18570/LOC_Os03g18580	Yes
Ath_circ_FC0708	exon	AT1G48850	osa_circ_018920	exonic	LOC_Os03g14990	Yes
Ath_circ_FC0709	exon	AT1G48850	osa_circ_018921	exonic	LOC_Os03g14990	Yes
Ath_circ_FC0710	exon	AT1G48920	osa_circ_036259	exonic	LOC_Os08g09350	Yes
Ath_circ_FC0716	exon	AT1G49670	osa_circ_039470	exonic	LOC_Os09g28570	Yes
Ath_circ_FC0718	exon	AT1G49740	osa_circ_023856	exonic	LOC_Os04g35100	Yes
Ath_circ_FC0719	exon	AT1G49740	osa_circ_023856	exonic	LOC_Os04g35100	Yes
Ath_circ_FC0720	exon	AT1G49760	osa_circ_036890	exonic	LOC_Os08g29124	Yes
Ath_circ_FC0721	exon	AT1G49870	osa_circ_020626	exonic	LOC_Os03g40780	Yes
Ath_circ_FC0722	exon	AT1G49890	osa_circ_018430	exonic	LOC_Os03g10820	Yes
Ath_circ_FC0728	exon	AT1G50030	osa_circ_027117	intergenic	NA	Yes
Ath_circ_FC0729	exon	AT1G50030	osa_circ_027117	intergenic	NA	Yes
Ath_circ_FC0731	exon	AT1G50200	osa_circ_006346	exonic	LOC_Os10g10244	Yes
Ath_circ_FC0732	exon	AT1G50200	osa_circ_006346	exonic	LOC_Os10g10244	Yes
Ath_circ_FC0733	Intergenic	n/a	osa_circ_011386	exonic	LOC_Os12g24550	Yes
Ath_circ_FC0735	exon	AT1G50380	osa_circ_032520	exonic	LOC_Os06g51410	Yes
Ath_circ_FC0739	exon	AT1G50430	osa_circ_014604	exonic	LOC_Os02g26650	Yes
Ath_circ_FC0741	exon	AT1G50660	osa_circ_028407	exonic	LOC_Os05g41910	Yes
Ath_circ_FC0749	exon	AT1G51540	osa_circ_024297	exonic	LOC_Os04g41020	Yes
Ath_circ_FC0750	exon	AT1G51690	osa_circ_013921	exonic	LOC_Os02g13110	Yes
Ath_circ_FC0751	exon	AT1G51950	osa_circ_013972	exonic	LOC_Os02g13520	Yes
Ath_circ_FC0752	exon	AT1G51980	osa_circ_028586	exonic	LOC_Os05g44916	Yes
Ath_circ_FC0753	exon	AT1G52150	osa_circ_007172	exonic	LOC_Os10g33960	Yes
Ath_circ_FC0754	exon	AT1G52150	osa_circ_007172	exonic	LOC_Os10g33960	Yes
Ath_circ_FC0755	exon	AT1G52150	osa_circ_007172	exonic	LOC_Os10g33960	Yes
Ath_circ_FC0761	exon	AT1G52360	osa_circ_013794	exonic	LOC_Os02g11830	Yes
Ath_circ_FC0762	exon	AT1G52360	osa_circ_013794	exonic	LOC_Os02g11830	Yes
Ath_circ_FC0769	Intergenic	n/a	osa_circ_025285	intronic	LOC_Os04g52614/LOC_Os04g52630	Yes
Ath_circ_FC0770	exon	AT1G53440	osa_circ_025285	intronic	LOC_Os04g52614/LOC_Os04g52630	Yes
Ath_circ_FC0772	exon	AT1G53650	osa_circ_014051	exonic	LOC_Os02g14760	Yes
Ath_circ_FC0773	Intergenic	n/a	osa_circ_016837	exonic	LOC_Os02g54340	Yes
Ath_circ_FC0777	exon	AT1G54100	osa_circ_039348	exonic	LOC_Os09g26880	Yes
Ath_circ_FC0778	exon	AT1G54110	osa_circ_037835	exonic	LOC_Os08g42210	Yes
Ath_circ_FC0780	exon	AT1G54310	osa_circ_013405	exonic	LOC_Os02g07740	Yes
Ath_circ_FC0783	exon	AT1G54650	osa_circ_033503	exonic	LOC_Os07g23169	Yes
Ath_circ_FC0784	exon	AT1G55110	osa_circ_018375	exonic	LOC_Os03g10140	Yes
Ath_circ_FC0788	exon	AT1G55490	osa_circ_029413	exonic	LOC_Os06g02380	Yes
Ath_circ_FC0789	exon	AT1G55510	osa_circ_032924	exonic	LOC_Os07g07470	Yes
Ath_circ_FC0790	exon	AT1G55520	osa_circ_020872	exonic	LOC_Os03g45410	Yes
Ath_circ_FC0795	exon	AT1G55740	osa_circ_024233	exonic	LOC_Os04g40520	Yes
Ath_circ_FC0797	exon	AT1G55810	osa_circ_014213	exonic	LOC_Os02g17320	Yes
Ath_circ_FC0798	exon	AT1G56070	osa_circ_014810	exonic	LOC_Os02g32030	Yes
Ath_circ_FC0799	exon	AT1G56070	osa_circ_022921	exonic	LOC_Os04g02820	Yes
Ath_circ_FC0800	Intergenic	n/a	osa_circ_008093	exonic	LOC_Os10g41999/LOC_Os10g42020	Yes
Ath_circ_FC0802	exon	AT1G56340	osa_circ_033284	exonic	LOC_Os07g14270	Yes
Ath_circ_FC0803	exon	AT1G56340	osa_circ_033284	exonic	LOC_Os07g14270	Yes
Ath_circ_FC0804	exon	AT1G56340	osa_circ_033284	exonic	LOC_Os07g14270	Yes
Ath_circ_FC0807	exon	AT1G56560	osa_circ_001608	exonic	LOC_Os01g22900	Yes
Ath_circ_FC0808	exon	AT1G56700	osa_circ_019971	exonic	LOC_Os03g25270	Yes
Ath_circ_FC0809	exon	AT1G57720	osa_circ_013899	exonic	LOC_Os02g12794/LOC_Os02g12800	Yes
Ath_circ_FC0813	exon	AT1G58060	osa_circ_023868	exonic	LOC_Os04g35260	Yes
Ath_circ_FC0814	exon	AT1G58200	osa_circ_020426	exonic	LOC_Os03g31839	Yes
Ath_circ_FC0817	exon	AT1G58250	osa_circ_020972	exonic	LOC_Os03g47760	Yes
Ath_circ_FC0818	exon	AT1G58250	osa_circ_020972	exonic	LOC_Os03g47760	Yes
Ath_circ_FC0827	exon	AT1G59870	osa_circ_002566	exonic	LOC_Os01g42370/LOC_Os01g42380	Yes
Ath_circ_FC0833	Intergenic	n/a	osa_circ_023440	exonic	LOC_Os04g26910/LOC_Os04g26920	Yes
Ath_circ_FC0839	exon	AT1G61150	osa_circ_018752	exonic	LOC_Os03g13220	Yes
Ath_circ_FC0840	exon	AT1G61210	osa_circ_007290	exonic	LOC_Os10g35200	Yes
Ath_circ_FC0841	exon	AT1G61210	osa_circ_007290	exonic	LOC_Os10g35200	Yes
Ath_circ_FC0846	exon	AT1G61580	osa_circ_010606	exonic	LOC_Os12g07010	Yes
Ath_circ_FC0847	exon	AT1G61580	osa_circ_008579	exonic	LOC_Os11g06750	Yes
Ath_circ_FC0850	Intergenic	n/a	osa_circ_024179	exonic	LOC_Os04g39814/LOC_Os04g39840	Yes
Ath_circ_FC0851	exon	AT1G61850	osa_circ_034073	exonic	LOC_Os07g33670	Yes
Ath_circ_FC0855	exon	AT1G62430	osa_circ_003966	exonic	LOC_Os01g55360	Yes
Ath_circ_FC0863	exon	AT1G63770	osa_circ_038111	exonic	LOC_Os08g44860	Yes
Ath_circ_FC0864	exon	AT1G63780	osa_circ_035894	exonic	LOC_Os08g05880	Yes
Ath_circ_FC0865	exon	AT1G63810	osa_circ_010592	exonic	LOC_Os12g06910	Yes
Ath_circ_FC0867	exon	AT1G64390	osa_circ_030442	exonic	LOC_Os06g14540	Yes
Ath_circ_FC0868	exon	AT1G64400	osa_circ_029754	exonic	LOC_Os06g06350	Yes
Ath_circ_FC0870	exon	AT1G64710	osa_circ_006249	exonic	LOC_Os10g07229	Yes
Ath_circ_FC0871	exon	AT1G64710	osa_circ_006249	exonic	LOC_Os10g07229	Yes
Ath_circ_FC0872	exon	AT1G64710	osa_circ_006249	exonic	LOC_Os10g07229	Yes
Ath_circ_FC0873	exon	AT1G64720	osa_circ_012891	exonic	LOC_Os02g03230	Yes
Ath_circ_FC0880	exon	AT1G64880	osa_circ_012620	exonic	LOC_Os02g01230	Yes
Ath_circ_FC0884	exon	AT1G65260	osa_circ_005195	exonic	LOC_Os01g67000	Yes
Ath_circ_FC0887	exon	AT1G65430	osa_circ_037896	exonic	LOC_Os08g42740	Yes
Ath_circ_FC0891	exon	AT1G65540	osa_circ_015429	exonic	LOC_Os02g39550	Yes
Ath_circ_FC0892	exon	AT1G65660	osa_circ_035720	exonic	LOC_Os08g03390	Yes
Ath_circ_FC0893	exon	AT1G65840	osa_circ_025366	exonic	LOC_Os04g53190/LOC_Os04g53195	Yes
Ath_circ_FC0894	exon	AT1G65930	osa_circ_002976	exonic	LOC_Os01g46610	Yes
Ath_circ_FC0895	exon	AT1G65950	osa_circ_009577	exonic	LOC_Os11g34750	Yes
Ath_circ_FC0896	exon	AT1G65950	osa_circ_009577	exonic	LOC_Os11g34750	Yes
Ath_circ_FC0899	exon	AT1G66410	osa_circ_001261	exonic	LOC_Os01g16240	Yes
Ath_circ_FC0901	exon	AT1G67090	osa_circ_011091	exonic	LOC_Os12g17600	Yes
Ath_circ_FC0909	exon	AT1G67500	osa_circ_035220	intronic	LOC_Os07g47284	Yes
Ath_circ_FC0912	exon	AT1G67890	osa_circ_014884	exonic	LOC_Os02g32610	Yes
Ath_circ_FC0921	exon	AT1G69220	osa_circ_021952	exonic	LOC_Os03g54780	Yes
Ath_circ_FC0923	exon	AT1G69420	osa_circ_034624	exonic	LOC_Os07g40480	Yes
Ath_circ_FC0930	exon	AT1G70280	osa_circ_014000	exonic	LOC_Os02g13950	Yes
Ath_circ_FC0934	exon	AT1G70490	osa_circ_033233	exonic	LOC_Os07g12170/LOC_Os07g12200	Yes
Ath_circ_FC0939	exon	AT1G70730	osa_circ_021260	exonic	LOC_Os03g50480	Yes
Ath_circ_FC0940	exon	AT1G70740	osa_circ_040129	exonic	LOC_Os09g37840	Yes
Ath_circ_FC0944	exon	AT1G70940	osa_circ_010437	exonic	LOC_Os12g04000	Yes
Ath_circ_FC0956	exon	AT1G71810	osa_circ_025551	exonic	LOC_Os04g54790	Yes
Ath_circ_FC0963	exon	AT1G72330	osa_circ_006701	exonic	LOC_Os10g25130	Yes
Ath_circ_FC0964	exon	AT1G72370	osa_circ_020253	exonic	LOC_Os03g28410	Yes
Ath_circ_FC0965	exon	AT1G72370	osa_circ_020253	exonic	LOC_Os03g28410	Yes
Ath_circ_FC0971	exon	AT1G72710	osa_circ_003564	exonic	LOC_Os01g51200	Yes
Ath_circ_FC0972	exon	AT1G72710	osa_circ_003564	exonic	LOC_Os01g51200	Yes
Ath_circ_FC0978	exon	AT1G73390	osa_circ_024632	exonic	LOC_Os04g44530	Yes
Ath_circ_FC0980	exon	AT1G73430	osa_circ_037252	exonic	LOC_Os08g34970	Yes
Ath_circ_FC0982	exon	AT1G73602	osa_circ_028774	exonic	LOC_Os05g47540/LOC_Os05g47545	Yes
Ath_circ_FC0983	exon	AT1G73602	osa_circ_028774	exonic	LOC_Os05g47540/LOC_Os05g47545	Yes
Ath_circ_FC0984	exon	AT1G73600	osa_circ_028772	exonic	LOC_Os05g47540/LOC_Os05g47545	Yes
Ath_circ_FC0985	exon	AT1G73602	osa_circ_028774	exonic	LOC_Os05g47540/LOC_Os05g47545	Yes
Ath_circ_FC0986	exon	AT1G73602	osa_circ_028772	exonic	LOC_Os05g47540/LOC_Os05g47545	Yes
Ath_circ_FC0990	exon	AT1G73720	osa_circ_001559	exonic	LOC_Os01g21940	Yes
Ath_circ_FC0994	exon	AT1G73960	osa_circ_039179	exonic	LOC_Os09g24440	Yes
Ath_circ_FC0996	exon	AT1G73990	osa_circ_016386	exonic	LOC_Os02g49570	Yes
Ath_circ_FC1003	exon	AT1G74470	osa_circ_016538	exonic	LOC_Os02g51080	Yes
Ath_circ_FC1005	exon	AT1G74560	osa_circ_015153	exonic	LOC_Os02g36710	Yes
Ath_circ_FC1007	exon	AT1G74920	osa_circ_037084	exonic	LOC_Os08g32870	Yes
Ath_circ_FC1018	exon	AT1G75380	osa_circ_036839	exonic	LOC_Os08g26870	Yes
Ath_circ_FC1021	exon	AT1G75630	osa_circ_014965	exonic	LOC_Os02g34510	Yes
Ath_circ_FC1022	exon	AT1G75660	osa_circ_005031	exonic	LOC_Os01g65220	Yes
Ath_circ_FC1023	exon	AT1G75660	osa_circ_005028	exonic	LOC_Os01g65220	Yes
Ath_circ_FC1024	exon	AT1G75660	osa_circ_005028	exonic	LOC_Os01g65220	Yes
Ath_circ_FC1039	exon	AT1G76970	osa_circ_008773	exonic	LOC_Os11g09329	Yes
Ath_circ_FC1040	exon	AT1G77110	osa_circ_031846	exonic	LOC_Os06g44970	Yes
Ath_circ_FC1041	exon	AT1G77110	osa_circ_031846	exonic	LOC_Os06g44970	Yes
Ath_circ_FC1044	exon	AT1G77410	osa_circ_018924	intronic	LOC_Os03g15020	Yes
Ath_circ_FC1045	exon	AT1G77410	osa_circ_005056	exonic	LOC_Os01g65460	Yes
Ath_circ_FC1060	exon	AT1G78290	osa_circ_023864	exonic	LOC_Os04g35240	Yes
Ath_circ_FC1067	exon	AT1G78610	osa_circ_015907	exonic	LOC_Os02g44770/LOC_Os02g44780	Yes
Ath_circ_FC1068	exon	AT1G78900	osa_circ_031861	exonic	LOC_Os06g45120	Yes
Ath_circ_FC1069	exon	AT1G78900	osa_circ_031856	exonic	LOC_Os06g45120	Yes
Ath_circ_FC1072	exon	AT1G79280	osa_circ_016500	exonic	LOC_Os02g50790	Yes
Ath_circ_FC1076	exon	AT1G79350	osa_circ_025160	exonic	LOC_Os04g52020	Yes
Ath_circ_FC1077	exon	AT1G79350	osa_circ_025160	exonic	LOC_Os04g52020	Yes
Ath_circ_FC1078	exon	AT1G79350	osa_circ_036385	exonic	LOC_Os08g12680	Yes
Ath_circ_FC1085	exon	AT1G79590	osa_circ_012799	exonic	LOC_Os02g02720	Yes
Ath_circ_FC1086	exon	AT1G79650	osa_circ_013474	exonic	LOC_Os02g08300	Yes
Ath_circ_FC1089	exon	AT1G79830	osa_circ_028913	exonic	LOC_Os05g48620	Yes
Ath_circ_FC1090	exon	AT1G79830	osa_circ_028914	exonic	LOC_Os05g48620	Yes
Ath_circ_FC1093	Intergenic	n/a	osa_circ_000533	exonic	LOC_Os01g08560	Yes
Ath_circ_FC1094	exon	AT1G79990	osa_circ_013794	exonic	LOC_Os02g11830	Yes
Ath_circ_FC1095	exon	AT1G79990	osa_circ_013794	exonic	LOC_Os02g11830	Yes
Ath_circ_FC1096	exon	AT1G79990	osa_circ_013794	exonic	LOC_Os02g11830	Yes
Ath_circ_FC1099	exon	AT1G80050	osa_circ_012138	exonic	LOC_Os12g39860	Yes
Ath_circ_FC1104	exon	AT1G80410	osa_circ_002646	exonic	LOC_Os01g43030	Yes
Ath_circ_FC1105	exon	AT1G80410	osa_circ_002646	exonic	LOC_Os01g43030	Yes
Ath_circ_FC1106	exon	AT1G80410	osa_circ_002654	exonic	LOC_Os01g43030	Yes
Ath_circ_FC1107	exon	AT1G80490	osa_circ_018910	exonic	LOC_Os03g14980	Yes
Ath_circ_FC1113	exon	AT1G80830	osa_circ_033348	exonic	LOC_Os07g15460	Yes
Ath_circ_FC1114	exon	AT1G80830	osa_circ_031985	exonic	LOC_Os06g46310	Yes
Ath_circ_FC1118	exon	AT2G01130	osa_circ_000144	exonic	LOC_Os01g02884	Yes
Ath_circ_FC1119	exon	AT2G01140	osa_circ_000138	exonic	LOC_Os01g02880	Yes
Ath_circ_FC1120	exon	AT2G01170	osa_circ_005801	exonic	LOC_Os01g71740/LOC_Os01g71760	Yes
Ath_circ_FC1121	exon	AT2G01170	osa_circ_005801	exonic	LOC_Os01g71740/LOC_Os01g71760	Yes
Ath_circ_FC1123	exon	AT2G01250	osa_circ_025116	exonic	LOC_Os04g51630	Yes
Ath_circ_FC1127	exon	AT2G01450	osa_circ_002796	exonic	LOC_Os01g43910	Yes
Ath_circ_FC1128	exon	AT2G01450	osa_circ_002796	exonic	LOC_Os01g43910	Yes
Ath_circ_FC1129	exon	AT2G01460	osa_circ_023285	exonic	LOC_Os04g21110	Yes
Ath_circ_FC1133	exon	AT2G01910	osa_circ_039379	exonic	LOC_Os09g27700	Yes
Ath_circ_FC1139	exon	AT2G02570	osa_circ_035590	exonic	LOC_Os08g01840	Yes
Ath_circ_FC1142	exon	AT2G02800	osa_circ_006760	exonic	LOC_Os10g26520	Yes
Ath_circ_FC1143	exon	AT2G02800	osa_circ_006760	exonic	LOC_Os10g26520	Yes
Ath_circ_FC1153	exon	AT2G03510	osa_circ_020336	exonic	LOC_Os03g30790	Yes
Ath_circ_FC1157	exon	AT2G03730	osa_circ_037822	exonic	LOC_Os08g42080	Yes
Ath_circ_FC1166	exon	AT2G04842	osa_circ_014930	exonic	LOC_Os02g33500	Yes
Ath_circ_FC1179	exon	AT2G07050	osa_circ_008744	exonic	LOC_Os11g08569	Yes
Ath_circ_FC1180	exon	AT2G07360	osa_circ_019025	exonic	LOC_Os03g15900	Yes
Ath_circ_FC1181	exon	AT2G07360	osa_circ_019022	exonic	LOC_Os03g15900	Yes
Ath_circ_FC1186	Intergenic	n/a	osa_circ_020065	exonic	LOC_Os03g26000/LOC_Os03g26030	Yes
Ath_circ_FC1190	exon	AT2G13360	osa_circ_037610	exonic	LOC_Os08g39300	Yes
Ath_circ_FC1196	exon	AT2G13560	osa_circ_033912	exonic	LOC_Os07g31380	Yes
Ath_circ_FC1199	exon	AT2G14050	osa_circ_030211	exonic	LOC_Os06g11500	Yes
Ath_circ_FC1200	exon	AT2G14050	osa_circ_030211	exonic	LOC_Os06g11500	Yes
Ath_circ_FC1211	exon	AT2G15900	osa_circ_008525	exonic	LOC_Os11g06040	Yes
Ath_circ_FC1213	exon	AT2G16510	osa_circ_014965	exonic	LOC_Os02g34510	Yes
Ath_circ_FC1215	exon	AT2G16920	osa_circ_000194	exonic	LOC_Os01g03520	Yes
Ath_circ_FC1216	exon	AT2G16940	osa_circ_017994	exonic	LOC_Os03g05830	Yes
Ath_circ_FC1217	exon	AT2G16950	osa_circ_026089	exonic	LOC_Os04g59494	Yes
Ath_circ_FC1218	exon	AT2G16950	osa_circ_026092	exonic	LOC_Os04g59494	Yes
Ath_circ_FC1224	exon	AT2G17340	osa_circ_030707	exonic	LOC_Os06g21980	Yes
Ath_circ_FC1226	exon	AT2G17510	osa_circ_017754	exonic	LOC_Os03g03710	Yes
Ath_circ_FC1228	exon	AT2G17790	osa_circ_022304	exonic	LOC_Os03g58700	Yes
Ath_circ_FC1230	exon	AT2G17930	osa_circ_035002	exonic	LOC_Os07g45074	Yes
Ath_circ_FC1234	exon	AT2G18960	osa_circ_025724	exonic	LOC_Os04g56160	Yes
Ath_circ_FC1235	exon	AT2G18960	osa_circ_025746	exonic	LOC_Os04g56160	Yes
Ath_circ_FC1242	exon	AT2G19470	osa_circ_003564	exonic	LOC_Os01g51200	Yes
Ath_circ_FC1246	exon	AT2G19830	osa_circ_038673	exonic	LOC_Os09g09480	Yes
Ath_circ_FC1254	exon	AT2G20060	osa_circ_009672	exonic	LOC_Os11g37510	Yes
Ath_circ_FC1255	exon	AT2G20300	osa_circ_001117	exonic	LOC_Os01g14932	Yes
Ath_circ_FC1256	exon	AT2G20340	osa_circ_033601	exonic	LOC_Os07g25590	Yes
Ath_circ_FC1259	exon	AT2G20420	osa_circ_015544	exonic	LOC_Os02g40830	Yes
Ath_circ_FC1261	exon	AT2G20570	osa_circ_001010	exonic	LOC_Os01g13740	Yes
Ath_circ_FC1272	exon	AT2G20610	osa_circ_014374	exonic	LOC_Os02g19924	Yes
Ath_circ_FC1273	exon	AT2G20610	osa_circ_009609	exonic	LOC_Os11g35040	Yes
Ath_circ_FC1282	exon	AT2G21170	osa_circ_040017	exonic	LOC_Os09g36450	Yes
Ath_circ_FC1283	exon	AT2G21170	osa_circ_040017	exonic	LOC_Os09g36450	Yes
Ath_circ_FC1287	exon	AT2G21390	osa_circ_021240	exonic	LOC_Os03g50340/LOC_Os03g50350	Yes
Ath_circ_FC1288	exon	AT2G21440	osa_circ_022514	exonic	LOC_Os03g60930	Yes
Ath_circ_FC1290	exon	AT2G21520	osa_circ_013007	exonic	LOC_Os02g04020	Yes
Ath_circ_FC1291	exon	AT2G21520	osa_circ_013007	exonic	LOC_Os02g04020	Yes
Ath_circ_FC1292	exon	AT2G21520	osa_circ_016333	exonic	LOC_Os02g48990	Yes
Ath_circ_FC1302	exon	AT2G22300	osa_circ_018305	exonic	LOC_Os03g09100	Yes
Ath_circ_FC1304	exon	AT2G22480	osa_circ_037177	exonic	LOC_Os08g34050	Yes
Ath_circ_FC1311	exon	AT2G23420	osa_circ_022626	exonic	LOC_Os03g62110	Yes
Ath_circ_FC1324	exon	AT2G24850	osa_circ_014374	exonic	LOC_Os02g19924	Yes
Ath_circ_FC1325	exon	AT2G24990	osa_circ_032854	exonic	LOC_Os07g06820	Yes
Ath_circ_FC1332	exon	AT2G25730	osa_circ_002427	exonic	LOC_Os01g40990	Yes
Ath_circ_FC1334	exon	AT2G25760	osa_circ_026959	exonic	LOC_Os05g11140	Yes
Ath_circ_FC1337	exon	AT2G25880	osa_circ_000689	exonic	LOC_Os01g09580	Yes
Ath_circ_FC1340	exon	AT2G26080	osa_circ_003609	exonic	LOC_Os01g51410	Yes
Ath_circ_FC1343	exon	AT2G26100	osa_circ_029749	exonic	LOC_Os06g06280	Yes
Ath_circ_FC1344	exon	AT2G26140	osa_circ_002284	exonic	LOC_Os01g39250/LOC_Os01g39260	Yes
Ath_circ_FC1350	exon	AT2G26580	osa_circ_020825	exonic	LOC_Os03g44710	Yes
Ath_circ_FC1362	exon	AT2G27460	osa_circ_023776	exonic	LOC_Os04g33690	Yes
Ath_circ_FC1364	exon	AT2G27530	osa_circ_038063	exonic	LOC_Os08g44450	Yes
Ath_circ_FC1365	exon	AT2G27710	osa_circ_000649	exonic	LOC_Os01g09510	Yes
Ath_circ_FC1366	exon	AT2G27900	osa_circ_007900	exonic	LOC_Os10g39910	Yes
Ath_circ_FC1369	exon	AT2G28000	osa_circ_011105	exonic	LOC_Os12g17910	Yes
Ath_circ_FC1374	exon	AT2G28290	osa_circ_030427	intergenic	NA	Yes
Ath_circ_FC1376	exon	AT2G28360	osa_circ_002355	exonic	LOC_Os01g40340	Yes
Ath_circ_FC1378	exon	AT2G28480	osa_circ_005891	exonic	LOC_Os01g72820	Yes
Ath_circ_FC1379	exon	AT2G28520	osa_circ_004720	exonic	LOC_Os01g61780	Yes
Ath_circ_FC1380	exon	AT2G28520	osa_circ_004725	exonic	LOC_Os01g61780	Yes
Ath_circ_FC1381	exon	AT2G28520	osa_circ_004725	exonic	LOC_Os01g61780	Yes
Ath_circ_FC1384	exon	AT2G28590	osa_circ_027662	exonic	LOC_Os05g30870	Yes
Ath_circ_FC1385	Intergenic	n/a	osa_circ_038057	exonic	LOC_Os08g44420	Yes
Ath_circ_FC1386	Intergenic	n/a	osa_circ_027782	exonic	LOC_Os05g33030	Yes
Ath_circ_FC1388	exon	AT2G29210	osa_circ_019091	exonic	LOC_Os03g16369	Yes
Ath_circ_FC1390	exon	AT2G29390	osa_circ_010240	exonic	LOC_Os11g48020	Yes
Ath_circ_FC1392	exon	AT2G29550	osa_circ_031960	exonic	LOC_Os06g46000	Yes
Ath_circ_FC1399	exon	AT2G30390	osa_circ_027601	exonic	LOC_Os05g29760	Yes
Ath_circ_FC1401	exon	AT2G30490	osa_circ_027431	exonic	LOC_Os05g25640	Yes
Ath_circ_FC1402	exon	AT2G30490	osa_circ_027431	exonic	LOC_Os05g25640	Yes
Ath_circ_FC1412	exon	AT2G30740	osa_circ_026491	exonic	LOC_Os05g04520	Yes
Ath_circ_FC1415	exon	AT2G30920	osa_circ_029709	exonic	LOC_Os06g05900	Yes
Ath_circ_FC1417	exon	AT2G30970	osa_circ_031109	exonic	LOC_Os06g35540	Yes
Ath_circ_FC1418	exon	AT2G30970	osa_circ_031109	exonic	LOC_Os06g35540	Yes
Ath_circ_FC1419	exon	AT2G30970	osa_circ_031109	exonic	LOC_Os06g35540	Yes
Ath_circ_FC1420	exon	AT2G30980	osa_circ_031107	exonic	LOC_Os06g35530	Yes
Ath_circ_FC1421	exon	AT2G31040	osa_circ_003192	exonic	LOC_Os01g48300/LOC_Os01g48310	Yes
Ath_circ_FC1422	exon	AT2G31040	osa_circ_003192	exonic	LOC_Os01g48300/LOC_Os01g48310	Yes
Ath_circ_FC1424	exon	AT2G31141	osa_circ_007562	intergenic	NA	Yes
Ath_circ_FC1425	exon	AT2G31141	osa_circ_007562	intergenic	NA	Yes
Ath_circ_FC1429	exon	AT2G31510	osa_circ_037891	exonic	LOC_Os08g42740	Yes
Ath_circ_FC1430	exon	AT2G31510	osa_circ_024349	exonic	LOC_Os04g41470	Yes
Ath_circ_FC1433	exon	AT2G31660	osa_circ_014668	exonic	LOC_Os02g27470	Yes
Ath_circ_FC1434	exon	AT2G31660	osa_circ_014668	exonic	LOC_Os02g27470	Yes
Ath_circ_FC1435	exon	AT2G31810	osa_circ_015442	exonic	LOC_Os02g39570	Yes
Ath_circ_FC1437	exon	AT2G31810	osa_circ_015442	exonic	LOC_Os02g39570	Yes
Ath_circ_FC1443	exon	AT2G31900	osa_circ_021029	exonic	LOC_Os03g48140	Yes
Ath_circ_FC1445	exon	AT2G31960	osa_circ_017387	exonic	LOC_Os02g58554	Yes
Ath_circ_FC1447	exon	AT2G32010	osa_circ_032953	exonic	LOC_Os07g07950	Yes
Ath_circ_FC1448	exon	AT2G32040	osa_circ_032939	exonic	LOC_Os07g07654	Yes
Ath_circ_FC1449	exon	AT2G32040	osa_circ_032939	exonic	LOC_Os07g07654	Yes
Ath_circ_FC1458	exon	AT2G32430	osa_circ_032013	exonic	LOC_Os06g46570	Yes
Ath_circ_FC1459	exon	AT2G32430	osa_circ_032013	exonic	LOC_Os06g46570	Yes
Ath_circ_FC1460	exon	AT2G32430	osa_circ_032013	exonic	LOC_Os06g46570	Yes
Ath_circ_FC1463	exon	AT2G32640	osa_circ_037080	exonic	LOC_Os08g32630	Yes
Ath_circ_FC1466	exon	AT2G32700	osa_circ_017124	exonic	LOC_Os02g56880	Yes
Ath_circ_FC1467	exon	AT2G32700	osa_circ_017124	exonic	LOC_Os02g56880	Yes
Ath_circ_FC1468	exon	AT2G32700	osa_circ_017124	exonic	LOC_Os02g56880	Yes
Ath_circ_FC1469	exon	AT2G32700	osa_circ_017124	exonic	LOC_Os02g56880	Yes
Ath_circ_FC1470	exon	AT2G32730	osa_circ_036396	exonic	LOC_Os08g12820	Yes
Ath_circ_FC1471	exon	AT2G32730	osa_circ_036396	exonic	LOC_Os08g12820	Yes
Ath_circ_FC1473	exon	AT2G32900	osa_circ_009559	exonic	LOC_Os11g34310	Yes
Ath_circ_FC1477	exon	AT2G33150	osa_circ_006993	exonic	LOC_Os10g31950	Yes
Ath_circ_FC1478	exon	AT2G33210	osa_circ_017877	exonic	LOC_Os03g04970	Yes
Ath_circ_FC1487	exon	AT2G34420	osa_circ_002509	exonic	LOC_Os01g41710	Yes
Ath_circ_FC1490	exon	AT2G34560	osa_circ_003958	exonic	LOC_Os01g55260	Yes
Ath_circ_FC1491	exon	AT2G34560	osa_circ_003958	exonic	LOC_Os01g55260	Yes
Ath_circ_FC1492	exon	AT2G34660	osa_circ_025325	exonic	LOC_Os04g52900	Yes
Ath_circ_FC1495	exon	AT2G34710	osa_circ_020750	exonic	LOC_Os03g43930	Yes
Ath_circ_FC1496	exon	AT2G34710	osa_circ_020750	exonic	LOC_Os03g43930	Yes
Ath_circ_FC1497	exon	AT2G34710	osa_circ_007167	exonic	LOC_Os10g33960	Yes
Ath_circ_FC1498	exon	AT2G35050	osa_circ_020212	exonic	LOC_Os03g28300	Yes
Ath_circ_FC1500	exon	AT2G35110	osa_circ_037924	exonic	LOC_Os08g43130	Yes
Ath_circ_FC1501	exon	AT2G35110	osa_circ_037925	exonic	LOC_Os08g43130	Yes
Ath_circ_FC1504	exon	AT2G35630	osa_circ_004582	exonic	LOC_Os01g60040	Yes
Ath_circ_FC1506	exon	AT2G35630	osa_circ_004579	exonic	LOC_Os01g60040	Yes
Ath_circ_FC1507	exon	AT2G35630	osa_circ_004576	intronic	LOC_Os01g60040	Yes
Ath_circ_FC1508	exon	AT2G35635	osa_circ_013255	exonic	LOC_Os02g06640	Yes
Ath_circ_FC1509	exon	AT2G35650	osa_circ_034879	exonic	LOC_Os07g43710	Yes
Ath_circ_FC1510	exon	AT2G35650	osa_circ_034879	exonic	LOC_Os07g43710	Yes
Ath_circ_FC1511	exon	AT2G35690	osa_circ_029290	exonic	LOC_Os06g01390	Yes
Ath_circ_FC1512	exon	AT2G35690	osa_circ_029290	exonic	LOC_Os06g01390	Yes
Ath_circ_FC1514	exon	AT2G35750	osa_circ_017852	exonic	LOC_Os03g04590	Yes
Ath_circ_FC1515	exon	AT2G35780	osa_circ_000401	exonic	LOC_Os01g06490	Yes
Ath_circ_FC1517	exon	AT2G35840	osa_circ_013110	exonic	LOC_Os02g05030	Yes
Ath_circ_FC1518	exon	AT2G35920	osa_circ_000140	intronic	LOC_Os01g02884	Yes
Ath_circ_FC1519	exon	AT2G36010	osa_circ_010526	exonic	LOC_Os12g06200	Yes
Ath_circ_FC1523	exon	AT2G36390	osa_circ_014889	exonic	LOC_Os02g32660	Yes
Ath_circ_FC1525	exon	AT2G36490	osa_circ_000843	exonic	LOC_Os01g11900	Yes
Ath_circ_FC1526	exon	AT2G36530	osa_circ_006277	exonic	LOC_Os10g08550	Yes
Ath_circ_FC1527	exon	AT2G36530	osa_circ_018857	exonic	LOC_Os03g14450	Yes
Ath_circ_FC1528	exon	AT2G36580	osa_circ_010483	exonic	LOC_Os12g05110	Yes
Ath_circ_FC1530	exon	AT2G36810	osa_circ_017927	exonic	LOC_Os03g05330	Yes
Ath_circ_FC1532	exon	AT2G36880	osa_circ_001571	exonic	LOC_Os01g22010	Yes
Ath_circ_FC1533	exon	AT2G36880	osa_circ_026480	exonic	LOC_Os05g04510/LOC_Os05g04520	Yes
Ath_circ_FC1538	exon	AT2G37270	osa_circ_009351	exonic	LOC_Os11g29190	Yes
Ath_circ_FC1539	exon	AT2G37280	osa_circ_003736	exonic	LOC_Os01g52560	Yes
Ath_circ_FC1555	exon	AT2G38120	osa_circ_028082	exonic	LOC_Os05g37470	Yes
Ath_circ_FC1556	exon	AT2G38170	osa_circ_014448	exonic	LOC_Os02g21009	Yes
Ath_circ_FC1557	exon	AT2G38170	osa_circ_014448	exonic	LOC_Os02g21009	Yes
Ath_circ_FC1561	exon	AT2G38280	osa_circ_035452	exonic	LOC_Os07g49270/LOC_Os07g49280	Yes
Ath_circ_FC1566	exon	AT2G38610	osa_circ_022432	exonic	LOC_Os03g60110	Yes
Ath_circ_FC1569	exon	AT2G38960	osa_circ_021673	exonic	LOC_Os03g52340	Yes
Ath_circ_FC1570	exon	AT2G39010	osa_circ_033646	exonic	LOC_Os07g26640/LOC_Os07g26660	Yes
Ath_circ_FC1571	exon	AT2G39010	osa_circ_015674	exonic	LOC_Os02g41860	Yes
Ath_circ_FC1580	exon	AT2G39660	osa_circ_006760	exonic	LOC_Os10g26520	Yes
Ath_circ_FC1583	exon	AT2G39730	osa_circ_010225	exonic	LOC_Os11g47970	Yes
Ath_circ_FC1584	exon	AT2G39730	osa_circ_010230	exonic	LOC_Os11g47970/LOC_Os11g47980	Yes
Ath_circ_FC1585	exon	AT2G39730	osa_circ_010230	exonic	LOC_Os11g47970/LOC_Os11g47980	Yes
Ath_circ_FC1588	exon	AT2G39800	osa_circ_028129	exonic	LOC_Os05g38150	Yes
Ath_circ_FC1589	exon	AT2G39800	osa_circ_028129	exonic	LOC_Os05g38150	Yes
Ath_circ_FC1600	exon	AT2G40320	osa_circ_022457	exonic	LOC_Os03g60350	Yes
Ath_circ_FC1605	exon	AT2G40520	osa_circ_010360	exonic	LOC_Os12g02260	Yes
Ath_circ_FC1606	exon	AT2G40540	osa_circ_035318	exonic	LOC_Os07g48130	Yes
Ath_circ_FC1616	exon	AT2G41220	osa_circ_035138	exonic	LOC_Os07g46460	Yes
Ath_circ_FC1617	exon	AT2G41220	osa_circ_035133	exonic	LOC_Os07g46460	Yes
Ath_circ_FC1619	Intergenic	n/a	osa_circ_021533	intergenic	NA	Yes
Ath_circ_FC1620	Intergenic	n/a	osa_circ_021533	intergenic	NA	Yes
Ath_circ_FC1621	Intergenic	n/a	osa_circ_021538	intergenic	NA	Yes
Ath_circ_FC1622	Intergenic	n/a	osa_circ_021533	intergenic	NA	Yes
Ath_circ_FC1623	Intergenic	n/a	osa_circ_021538	intergenic	NA	Yes
Ath_circ_FC1624	Intergenic	n/a	osa_circ_021533	intergenic	NA	Yes
Ath_circ_FC1625	Intergenic	n/a	osa_circ_021533	intergenic	NA	Yes
Ath_circ_FC1626	exon	AT2G41680	osa_circ_035094	exonic	LOC_Os07g46410	Yes
Ath_circ_FC1627	exon	AT2G41680	osa_circ_035094	exonic	LOC_Os07g46410	Yes
Ath_circ_FC1628	exon	AT2G41680	osa_circ_035093	exonic	LOC_Os07g46410	Yes
Ath_circ_FC1630	exon	AT2G41740	osa_circ_019892	exonic	LOC_Os03g24220	Yes
Ath_circ_FC1631	exon	AT2G41740	osa_circ_019890	exonic	LOC_Os03g24220	Yes
Ath_circ_FC1634	exon	AT2G41790	osa_circ_034406	exonic	LOC_Os07g38260	Yes
Ath_circ_FC1639	exon	AT2G42320	osa_circ_039653	exonic	LOC_Os09g31230	Yes
Ath_circ_FC1640	exon	AT2G42500	osa_circ_022348	exonic	LOC_Os03g59060	Yes
Ath_circ_FC1643	exon	AT2G42590	osa_circ_024090	exonic	LOC_Os04g38870	Yes
Ath_circ_FC1644	exon	AT2G42600	osa_circ_014062	exonic	LOC_Os02g14770	Yes
Ath_circ_FC1645	exon	AT2G42600	osa_circ_014062	exonic	LOC_Os02g14770	Yes
Ath_circ_FC1646	exon	AT2G42600	osa_circ_036854	exonic	LOC_Os08g27840	Yes
Ath_circ_FC1649	exon	AT2G42750	osa_circ_028616	exonic	LOC_Os05g45350	Yes
Ath_circ_FC1653	exon	AT2G43070	osa_circ_009248	exonic	LOC_Os11g24540	Yes
Ath_circ_FC1657	exon	AT2G43330	osa_circ_024345	exonic	LOC_Os04g41460	Yes
Ath_circ_FC1673	exon	AT2G44100	osa_circ_027915	exonic	LOC_Os05g34540	Yes
Ath_circ_FC1674	exon	AT2G44160	osa_circ_022430	exonic	LOC_Os03g60090	Yes
Ath_circ_FC1685	exon	AT2G44710	osa_circ_024725	exonic	LOC_Os04g45930	Yes
Ath_circ_FC1693	exon	AT2G45270	osa_circ_011489	exonic	LOC_Os12g29990	Yes
Ath_circ_FC1694	exon	AT2G45290	osa_circ_029546	exonic	LOC_Os06g04270	Yes
Ath_circ_FC1700	exon	AT2G45540	osa_circ_024814	exonic	LOC_Os04g46894	Yes
Ath_circ_FC1701	exon	AT2G45540	osa_circ_024814	exonic	LOC_Os04g46894	Yes
Ath_circ_FC1707	exon	AT2G45950	osa_circ_017458	exonic	LOC_Os03g01660	Yes
Ath_circ_FC1710	exon	AT2G46320	osa_circ_036946	exonic	LOC_Os08g29720	Yes
Ath_circ_FC1716	exon	AT2G46710	osa_circ_010514	exonic	LOC_Os12g05900	Yes
Ath_circ_FC1719	exon	AT2G47010	osa_circ_027208	exonic	LOC_Os05g19000/LOC_Os05g19030	Yes
Ath_circ_FC1721	exon	AT2G47160	osa_circ_011998	exonic	LOC_Os12g37840	Yes
Ath_circ_FC1722	exon	AT2G47240	osa_circ_026441	exonic	LOC_Os05g04170	Yes
Ath_circ_FC1723	exon	AT2G47240	osa_circ_026441	exonic	LOC_Os05g04170	Yes
Ath_circ_FC1731	exon	AT2G47830	osa_circ_019772	exonic	LOC_Os03g22550	Yes
Ath_circ_FC1742	exon	AT3G01090	osa_circ_028623	exonic	LOC_Os05g45420	Yes
Ath_circ_FC1745	exon	AT3G01150	osa_circ_020060	exonic	LOC_Os03g25980	Yes
Ath_circ_FC1747	exon	AT3G01310	osa_circ_021044	exonic	LOC_Os03g48300	Yes
Ath_circ_FC1748	exon	AT3G01310	osa_circ_021045	exonic	LOC_Os03g48300	Yes
Ath_circ_FC1750	exon	AT3G01320	osa_circ_026127	exonic	LOC_Os05g01020	Yes
Ath_circ_FC1759	exon	AT3G01520	osa_circ_016173	exonic	LOC_Os02g47840	Yes
Ath_circ_FC1760	exon	AT3G01540	osa_circ_009743	exonic	LOC_Os11g38670	Yes
Ath_circ_FC1761	exon	AT3G01540	osa_circ_019479	exonic	LOC_Os03g19530	Yes
Ath_circ_FC1765	exon	AT3G01910	osa_circ_037798	exonic	LOC_Os08g41830	Yes
Ath_circ_FC1767	exon	AT3G02020	osa_circ_022731	exonic	LOC_Os03g63330	Yes
Ath_circ_FC1769	exon	AT3G02090	osa_circ_018493	exonic	LOC_Os03g11410	Yes
Ath_circ_FC1772	exon	AT3G02130	osa_circ_021963	exonic	LOC_Os03g54900	Yes
Ath_circ_FC1776	exon	AT3G02320	osa_circ_006573	exonic	LOC_Os10g21360	Yes
Ath_circ_FC1778	exon	AT3G02350	osa_circ_014721	exonic	LOC_Os02g29530	Yes
Ath_circ_FC1779	exon	AT3G02450	osa_circ_002284	exonic	LOC_Os01g39250/LOC_Os01g39260	Yes
Ath_circ_FC1780	exon	AT3G02450	osa_circ_002284	exonic	LOC_Os01g39250/LOC_Os01g39260	Yes
Ath_circ_FC1781	exon	AT3G02468	osa_circ_024427	exonic	LOC_Os04g42090/LOC_Os04g42095	Yes
Ath_circ_FC1784	exon	AT3G02520	osa_circ_015165	exonic	LOC_Os02g36974	Yes
Ath_circ_FC1785	exon	AT3G02560	osa_circ_019365	exonic	LOC_Os03g18570/LOC_Os03g18580	Yes
Ath_circ_FC1786	exon	AT3G02830	osa_circ_009326	exonic	LOC_Os11g28270	Yes
Ath_circ_FC1793	exon	AT3G03520	osa_circ_022531	exonic	LOC_Os03g61130	Yes
Ath_circ_FC1799	exon	AT3G03710	osa_circ_032915	exonic	LOC_Os07g07310	Yes
Ath_circ_FC1801	exon	AT3G03780	osa_circ_012407	exonic	LOC_Os12g42876/LOC_Os12g42884	Yes
Ath_circ_FC1810	exon	AT3G04600	osa_circ_011901	exonic	LOC_Os12g35570	Yes
Ath_circ_FC1811	exon	AT3G04840	osa_circ_018393	exonic	LOC_Os03g10340	Yes
Ath_circ_FC1812	exon	AT3G04870	osa_circ_033153	exonic	LOC_Os07g10490	Yes
Ath_circ_FC1814	exon	AT3G04910	osa_circ_034460	exonic	LOC_Os07g38530	Yes
Ath_circ_FC1820	exon	AT3G05350	osa_circ_033170	exonic	LOC_Os07g10540	Yes
Ath_circ_FC1824	exon	AT3G05420	osa_circ_011899	exonic	LOC_Os12g35560	Yes
Ath_circ_FC1825	exon	AT3G05530	osa_circ_029848	exonic	LOC_Os06g07630	Yes
Ath_circ_FC1826	exon	AT3G05580	osa_circ_001666	exonic	LOC_Os01g24750	Yes
Ath_circ_FC1827	exon	AT3G05580	osa_circ_001666	exonic	LOC_Os01g24750	Yes
Ath_circ_FC1828	exon	AT3G05630	osa_circ_001498	exonic	LOC_Os01g20860	Yes
Ath_circ_FC1837	exon	AT3G06350	osa_circ_001756	exonic	LOC_Os01g27750	Yes
Ath_circ_FC1838	exon	AT3G06400	osa_circ_026594	exonic	LOC_Os05g05780	Yes
Ath_circ_FC1840	exon	AT3G06450	osa_circ_000499	exonic	LOC_Os01g08020	Yes
Ath_circ_FC1841	exon	AT3G06483	osa_circ_034949	exonic	LOC_Os07g44330	Yes
Ath_circ_FC1842	exon	AT3G06500	osa_circ_001611	exonic	LOC_Os01g22900	Yes
Ath_circ_FC1843	exon	AT3G06500	osa_circ_001608	exonic	LOC_Os01g22900	Yes
Ath_circ_FC1846	exon	AT3G06650	osa_circ_001448	exonic	LOC_Os01g19450	Yes
Ath_circ_FC1851	exon	AT3G06850	osa_circ_001510	exonic	LOC_Os01g21160	Yes
Ath_circ_FC1852	exon	AT3G06860	osa_circ_014234	exonic	LOC_Os02g17390	Yes
Ath_circ_FC1854	exon	AT3G06950	osa_circ_027224	exonic	LOC_Os05g19954	Yes
Ath_circ_FC1856	exon	AT3G07050	osa_circ_001751	exonic	LOC_Os01g27730	Yes
Ath_circ_FC1865	exon	AT3G07810	osa_circ_034561	exonic	LOC_Os07g39560	Yes
Ath_circ_FC1868	exon	AT3G08690	osa_circ_004624	exonic	LOC_Os01g60410	Yes
Ath_circ_FC1869	exon	AT3G08720	osa_circ_019664	exonic	LOC_Os03g21620	Yes
Ath_circ_FC1871	exon	AT3G08850	osa_circ_010297	exonic	LOC_Os12g01922	Yes
Ath_circ_FC1872	exon	AT3G08930	osa_circ_029490	exonic	LOC_Os06g03760	Yes
Ath_circ_FC1873	exon	AT3G09010	osa_circ_018995	exonic	LOC_Os03g15770	Yes
Ath_circ_FC1875	exon	AT3G09100	osa_circ_008869	exonic	LOC_Os11g11070	Yes
Ath_circ_FC1876	exon	AT3G09100	osa_circ_008872	exonic	LOC_Os11g11070	Yes
Ath_circ_FC1878	exon	AT3G09200	osa_circ_035745	exonic	LOC_Os08g03640	Yes
Ath_circ_FC1884	exon	AT3G09920	osa_circ_021138	exonic	LOC_Os03g49510	Yes
Ath_circ_FC1891	exon	AT3G10250	osa_circ_013049	exonic	LOC_Os02g04450	Yes
Ath_circ_FC1893	exon	AT3G10270	osa_circ_001268	exonic	LOC_Os01g16290	Yes
Ath_circ_FC1894	exon	AT3G10330	osa_circ_040013	exonic	LOC_Os09g36440	Yes
Ath_circ_FC1895	exon	AT3G10350	osa_circ_016539	exonic	LOC_Os02g51100	Yes
Ath_circ_FC1901	exon	AT3G10640	osa_circ_000035	exonic	LOC_Os01g01350	Yes
Ath_circ_FC1904	exon	AT3G10970	osa_circ_026801	exonic	LOC_Os05g07632	Yes
Ath_circ_FC1906	exon	AT3G11130	osa_circ_010270	exonic	LOC_Os12g01390	Yes
Ath_circ_FC1907	exon	AT3G11130	osa_circ_010270	exonic	LOC_Os12g01390	Yes
Ath_circ_FC1908	exon	AT3G11130	osa_circ_010270	exonic	LOC_Os12g01390	Yes
Ath_circ_FC1910	exon	AT3G11130	osa_circ_008235	exonic	LOC_Os11g01380	Yes
Ath_circ_FC1911	exon	AT3G11270	osa_circ_025809	exonic	LOC_Os04g56646	Yes
Ath_circ_FC1915	exon	AT3G11540	osa_circ_038075	exonic	LOC_Os08g44510	Yes
Ath_circ_FC1916	exon	AT3G11540	osa_circ_038075	exonic	LOC_Os08g44510	Yes
Ath_circ_FC1917	intron	AT3G11540	osa_circ_038077	exonic	LOC_Os08g44510	Yes
Ath_circ_FC1921	exon	AT3G11830	osa_circ_032101	exonic	LOC_Os06g47320	Yes
Ath_circ_FC1922	exon	AT3G11910	osa_circ_011497	exonic	LOC_Os12g30540	Yes
Ath_circ_FC1923	exon	AT3G11960	osa_circ_033150	exonic	LOC_Os07g10390	Yes
Ath_circ_FC1927	exon	AT3G12020	osa_circ_016733	exonic	LOC_Os02g53520	Yes
Ath_circ_FC1934	Intergenic	n/a	osa_circ_027499	exonic	LOC_Os05g28280	Yes
Ath_circ_FC1943	exon	AT3G12760	osa_circ_030310	exonic	LOC_Os06g12690	Yes
Ath_circ_FC1944	exon	AT3G12780	osa_circ_013358	exonic	LOC_Os02g07260	Yes
Ath_circ_FC1951	exon	AT3G13300	osa_circ_030613	exonic	LOC_Os06g19660	Yes
Ath_circ_FC1952	exon	AT3G13330	osa_circ_030634	exonic	LOC_Os06g19730	Yes
Ath_circ_FC1953	exon	AT3G13330	osa_circ_030630	exonic	LOC_Os06g19730	Yes
Ath_circ_FC1957	exon	AT3G13670	osa_circ_004106	exonic	LOC_Os01g56580	Yes
Ath_circ_FC1958	exon	AT3G13750	osa_circ_002328	exonic	LOC_Os01g39830	Yes
Ath_circ_FC1959	exon	AT3G13750	osa_circ_002328	exonic	LOC_Os01g39830	Yes
Ath_circ_FC1960	exon	AT3G13810	osa_circ_037994	exonic	LOC_Os08g44050	Yes
Ath_circ_FC1961	exon	AT3G13860	osa_circ_007037	exonic	LOC_Os10g32550	Yes
Ath_circ_FC1962	exon	AT3G13920	osa_circ_013121	exonic	LOC_Os02g05330	Yes
Ath_circ_FC1969	exon	AT3G14205	osa_circ_018239	exonic	LOC_Os03g08430	Yes
Ath_circ_FC1970	exon	AT3G14205	osa_circ_016821	exonic	LOC_Os02g54150	Yes
Ath_circ_FC1971	exon	AT3G14205	osa_circ_016821	exonic	LOC_Os02g54150	Yes
Ath_circ_FC1977	exon	AT3G14415	osa_circ_032795	exonic	LOC_Os07g05820	Yes
Ath_circ_FC1978	exon	AT3G14415	osa_circ_032795	exonic	LOC_Os07g05820	Yes
Ath_circ_FC1979	exon	AT3G14415	osa_circ_032795	exonic	LOC_Os07g05820	Yes
Ath_circ_FC1980	exon	AT3G14415	osa_circ_036277	exonic	LOC_Os08g09870	Yes
Ath_circ_FC1981	exon	AT3G14415	osa_circ_036277	exonic	LOC_Os08g09870	Yes
Ath_circ_FC1982	exon	AT3G14420	osa_circ_032795	exonic	LOC_Os07g05820	Yes
Ath_circ_FC1983	exon	AT3G14420	osa_circ_025379	exonic	LOC_Os04g53210/LOC_Os04g53214	Yes
Ath_circ_FC1986	exon	AT3G14720	osa_circ_029105	exonic	LOC_Os05g50560	Yes
Ath_circ_FC1987	exon	AT3G14720	osa_circ_029105	exonic	LOC_Os05g50560	Yes
Ath_circ_FC1988	exon	AT3G14720	osa_circ_028979	exonic	LOC_Os05g49140	Yes
Ath_circ_FC2008	exon	AT3G15730	osa_circ_000484	exonic	LOC_Os01g07760	Yes
Ath_circ_FC2009	exon	AT3G15730	osa_circ_000482	exonic	LOC_Os01g07760	Yes
Ath_circ_FC2011	exon	AT3G15880	osa_circ_001149	exonic	LOC_Os01g15020	Yes
Ath_circ_FC2012	exon	AT3G15980	osa_circ_013776	exonic	LOC_Os02g11830/LOC_Os02g11840	Yes
Ath_circ_FC2013	exon	AT3G15980	osa_circ_013794	exonic	LOC_Os02g11830	Yes
Ath_circ_FC2015	exon	AT3G16100	osa_circ_028515	exonic	LOC_Os05g44050	Yes
Ath_circ_FC2017	exon	AT3G16230	osa_circ_000953	exonic	LOC_Os01g13100	Yes
Ath_circ_FC2018	exon	AT3G16240	osa_circ_030751	exonic	LOC_Os06g22960	Yes
Ath_circ_FC2019	exon	AT3G16320	osa_circ_031407	exonic	LOC_Os06g41750	Yes
Ath_circ_FC2020	exon	AT3G16340	osa_circ_002564	exonic	LOC_Os01g42370/LOC_Os01g42380	Yes
Ath_circ_FC2021	exon	AT3G16340	osa_circ_009691	exonic	LOC_Os11g37700	Yes
Ath_circ_FC2025	exon	AT3G16480	osa_circ_028586	exonic	LOC_Os05g44916	Yes
Ath_circ_FC2026	exon	AT3G16480	osa_circ_000663	exonic	LOC_Os01g09560	Yes
Ath_circ_FC2027	exon	AT3G16570	osa_circ_001700	exonic	LOC_Os01g25540	Yes
Ath_circ_FC2028	exon	AT3G16630	osa_circ_026628	exonic	LOC_Os05g06280	Yes
Ath_circ_FC2029	exon	AT3G16630	osa_circ_026628	exonic	LOC_Os05g06280	Yes
Ath_circ_FC2030	exon	AT3G16785	osa_circ_001498	exonic	LOC_Os01g20860	Yes
Ath_circ_FC2039	exon	AT3G17040	osa_circ_019481	exonic	LOC_Os03g19560	Yes
Ath_circ_FC2040	exon	AT3G17205	osa_circ_026715	exonic	LOC_Os05g06690	Yes
Ath_circ_FC2041	exon	AT3G17410	osa_circ_026492	exonic	LOC_Os05g04520	Yes
Ath_circ_FC2042	exon	AT3G17410	osa_circ_026492	exonic	LOC_Os05g04520	Yes
Ath_circ_FC2044	exon	AT3G17470	osa_circ_026735	exonic	LOC_Os05g06890	Yes
Ath_circ_FC2045	exon	AT3G17510	osa_circ_001414	exonic	LOC_Os01g18800	Yes
Ath_circ_FC2046	exon	AT3G17650	osa_circ_023625	exonic	LOC_Os04g32050	Yes
Ath_circ_FC2048	exon	AT3G17770	osa_circ_021334	exonic	LOC_Os03g51000	Yes
Ath_circ_FC2057	exon	AT3G18290	osa_circ_028804	exonic	LOC_Os05g47780	Yes
Ath_circ_FC2058	exon	AT3G18290	osa_circ_003411	exonic	LOC_Os01g49470	Yes
Ath_circ_FC2059	exon	AT3G18390	osa_circ_028811	exonic	LOC_Os05g47850	Yes
Ath_circ_FC2063	exon	AT3G18780	osa_circ_026188	exonic	LOC_Os05g01600	Yes
Ath_circ_FC2068	exon	AT3G19130	osa_circ_036212	exonic	LOC_Os08g09100	Yes
Ath_circ_FC2069	exon	AT3G19170	osa_circ_016663	exonic	LOC_Os02g52390	Yes
Ath_circ_FC2075	exon	AT3G19590	osa_circ_020447	exonic	LOC_Os03g33580	Yes
Ath_circ_FC2079	exon	AT3G19720	osa_circ_010687	exonic	LOC_Os12g07880	Yes
Ath_circ_FC2090	exon	AT3G19960	osa_circ_007219	exonic	LOC_Os10g34710	Yes
Ath_circ_FC2091	exon	AT3G19980	osa_circ_003443	exonic	LOC_Os01g49690	Yes
Ath_circ_FC2097	exon	AT3G20440	osa_circ_030801	exonic	LOC_Os06g26234	Yes
Ath_circ_FC2098	exon	AT3G20540	osa_circ_036077	exonic	LOC_Os08g07840/LOC_Os08g07850	Yes
Ath_circ_FC2100	exon	AT3G20560	osa_circ_034106	exonic	LOC_Os07g34030	Yes
Ath_circ_FC2102	exon	AT3G20800	osa_circ_034330	exonic	LOC_Os07g37790	Yes
Ath_circ_FC2104	exon	AT3G20870	osa_circ_035509	exonic	LOC_Os08g01030	Yes
Ath_circ_FC2109	exon	AT3G21390	osa_circ_005692	exonic	LOC_Os01g70800	Yes
Ath_circ_FC2117	exon	AT3G22190	osa_circ_020802	exonic	LOC_Os03g44610	Yes
Ath_circ_FC2119	exon	AT3G22290	osa_circ_022135	exonic	LOC_Os03g57100	Yes
Ath_circ_FC2120	exon	AT3G22290	osa_circ_022135	exonic	LOC_Os03g57100	Yes
Ath_circ_FC2121	exon	AT3G22310	osa_circ_022543	exonic	LOC_Os03g61220	Yes
Ath_circ_FC2122	exon	AT3G22330	osa_circ_032757	exonic	LOC_Os07g05050	Yes
Ath_circ_FC2140	exon	AT3G23640	osa_circ_033545	exonic	LOC_Os07g23944	Yes
Ath_circ_FC2141	exon	AT3G23640	osa_circ_033538	exonic	LOC_Os07g23880	Yes
Ath_circ_FC2142	exon	AT3G23640	osa_circ_033538	exonic	LOC_Os07g23880	Yes
Ath_circ_FC2145	exon	AT3G23810	osa_circ_009289	exonic	LOC_Os11g26850	Yes
Ath_circ_FC2147	exon	AT3G23940	osa_circ_038083	exonic	LOC_Os08g44530	Yes
Ath_circ_FC2148	exon	AT3G23990	osa_circ_007028	exonic	LOC_Os10g32550	Yes
Ath_circ_FC2153	exon	AT3G24180	osa_circ_007086	exonic	LOC_Os10g33420	Yes
Ath_circ_FC2154	exon	AT3G24190	osa_circ_017153	exonic	LOC_Os02g57160	Yes
Ath_circ_FC2155	exon	AT3G24350	osa_circ_000520	exonic	LOC_Os01g08400	Yes
Ath_circ_FC2162	exon	AT3G24890	osa_circ_033113	exonic	LOC_Os07g09600	Yes
Ath_circ_FC2163	exon	AT3G25040	osa_circ_009333	exonic	LOC_Os11g28340	Yes
Ath_circ_FC2167	exon	AT3G25560	osa_circ_036068	exonic	LOC_Os08g07760/LOC_Os08g07774	Yes
Ath_circ_FC2168	exon	AT3G25610	osa_circ_030920	exonic	LOC_Os06g29380	Yes
Ath_circ_FC2169	exon	AT3G25690	osa_circ_010271	exonic	LOC_Os12g01449	Yes
Ath_circ_FC2171	exon	AT3G25800	osa_circ_038561	exonic	LOC_Os09g07510	Yes
Ath_circ_FC2172	exon	AT3G25860	osa_circ_010699	exonic	LOC_Os12g08170	Yes
Ath_circ_FC2175	exon	AT3G25980	osa_circ_024277	exonic	LOC_Os04g40940	Yes
Ath_circ_FC2183	exon	AT3G26650	osa_circ_017762	exonic	LOC_Os03g03720	Yes
Ath_circ_FC2189	exon	AT3G27090	osa_circ_028410	exonic	LOC_Os05g41930	Yes
Ath_circ_FC2193	exon	AT3G27190	osa_circ_014217	exonic	LOC_Os02g17320	Yes
Ath_circ_FC2194	exon	AT3G27240	osa_circ_027318	exonic	LOC_Os05g23620	Yes
Ath_circ_FC2195	exon	AT3G27325	osa_circ_038662	exonic	LOC_Os09g09360	Yes
Ath_circ_FC2196	exon	AT3G27325	osa_circ_038663	exonic	LOC_Os09g09360	Yes
Ath_circ_FC2198	exon	AT3G27460	osa_circ_011170	exonic	LOC_Os12g19350	Yes
Ath_circ_FC2200	exon	AT3G27530	osa_circ_011891	exonic	LOC_Os12g35360	Yes
Ath_circ_FC2201	exon	AT3G27740	osa_circ_016174	exonic	LOC_Os02g47850	Yes
Ath_circ_FC2202	exon	AT3G27740	osa_circ_016174	exonic	LOC_Os02g47850	Yes
Ath_circ_FC2207	exon	AT3G28690	osa_circ_035219	exonic	LOC_Os07g47270	Yes
Ath_circ_FC2208	exon	AT3G28860	osa_circ_025578	intronic	LOC_Os04g54930	Yes
Ath_circ_FC2217	exon	AT3G29320	osa_circ_004848	exonic	LOC_Os01g63270	Yes
Ath_circ_FC2222	exon	AT3G33530	osa_circ_013045	exonic	LOC_Os02g04440	Yes
Ath_circ_FC2223	exon	AT3G42640	osa_circ_033093	exonic	LOC_Os07g09340	Yes
Ath_circ_FC2228	exon	AT3G43300	osa_circ_018848	exonic	LOC_Os03g14260	Yes
Ath_circ_FC2231	exon	AT3G43810	osa_circ_028331	exonic	LOC_Os05g41210	Yes
Ath_circ_FC2235	Intergenic	n/a	osa_circ_009182	intergenic	NA	Yes
Ath_circ_FC2241	exon	AT3G44680	osa_circ_023754	exonic	LOC_Os04g33480	Yes
Ath_circ_FC2243	exon	AT3G44730	osa_circ_019391	exonic	LOC_Os03g18980	Yes
Ath_circ_FC2257	exon	AT3G45770	osa_circ_008224	exonic	LOC_Os11g01154	Yes
Ath_circ_FC2258	exon	AT3G45770	osa_circ_008224	exonic	LOC_Os11g01154	Yes
Ath_circ_FC2262	exon	AT3G45850	osa_circ_026304	exonic	LOC_Os05g02670	Yes
Ath_circ_FC2263	exon	AT3G46040	osa_circ_033183	exonic	LOC_Os07g10720	Yes
Ath_circ_FC2275	exon	AT3G46920	osa_circ_029907	exonic	LOC_Os06g08280	Yes
Ath_circ_FC2276	exon	AT3G46970	osa_circ_004848	exonic	LOC_Os01g63270	Yes
Ath_circ_FC2277	exon	AT3G46970	osa_circ_004848	exonic	LOC_Os01g63270	Yes
Ath_circ_FC2278	exon	AT3G46970	osa_circ_004848	exonic	LOC_Os01g63270	Yes
Ath_circ_FC2279	exon	AT3G46970	osa_circ_004848	exonic	LOC_Os01g63270	Yes
Ath_circ_FC2280	exon	AT3G46970	osa_circ_004848	exonic	LOC_Os01g63270	Yes
Ath_circ_FC2281	exon	AT3G46970	osa_circ_004848	exonic	LOC_Os01g63270	Yes
Ath_circ_FC2282	exon	AT3G46970	osa_circ_004848	exonic	LOC_Os01g63270	Yes
Ath_circ_FC2283	exon	AT3G46970	osa_circ_004848	exonic	LOC_Os01g63270	Yes
Ath_circ_FC2290	exon	AT3G48110	osa_circ_029292	exonic	LOC_Os06g01400	Yes
Ath_circ_FC2299	exon	AT3G48750	osa_circ_017498	exonic	LOC_Os03g01850	Yes
Ath_circ_FC2300	exon	AT3G48750	osa_circ_017498	exonic	LOC_Os03g01850	Yes
Ath_circ_FC2301	exon	AT3G48780	osa_circ_005647	exonic	LOC_Os01g70370/LOC_Os01g70380	Yes
Ath_circ_FC2304	exon	AT3G48990	osa_circ_026009	exonic	LOC_Os04g58710	Yes
Ath_circ_FC2305	exon	AT3G48990	osa_circ_026014	exonic	LOC_Os04g58710	Yes
Ath_circ_FC2306	exon	AT3G49010	osa_circ_020519	exonic	LOC_Os03g37970	Yes
Ath_circ_FC2307	exon	AT3G49010	osa_circ_020519	exonic	LOC_Os03g37970	Yes
Ath_circ_FC2308	exon	AT3G49010	osa_circ_020519	exonic	LOC_Os03g37970	Yes
Ath_circ_FC2309	exon	AT3G49010	osa_circ_020519	exonic	LOC_Os03g37970	Yes
Ath_circ_FC2313	exon	AT3G49430	osa_circ_035272	exonic	LOC_Os07g47630	Yes
Ath_circ_FC2316	exon	AT3G49650	osa_circ_022066	exonic	LOC_Os03g56260	Yes
Ath_circ_FC2318	exon	AT3G49680	osa_circ_028892	exonic	LOC_Os05g48450/LOC_Os05g48500	Yes
Ath_circ_FC2319	exon	AT3G50000	osa_circ_032643	exonic	LOC_Os07g02350	Yes
Ath_circ_FC2324	exon	AT3G50530	osa_circ_034967	exonic	LOC_Os07g44710	Yes
Ath_circ_FC2325	exon	AT3G50700	osa_circ_018375	exonic	LOC_Os03g10140	Yes
Ath_circ_FC2327	exon	AT3G51070	osa_circ_005096	exonic	LOC_Os01g66110	Yes
Ath_circ_FC2328	exon	AT3G51300	osa_circ_012832	exonic	LOC_Os02g02840	Yes
Ath_circ_FC2338	exon	AT3G51800	osa_circ_027500	exonic	LOC_Os05g28280	Yes
Ath_circ_FC2339	exon	AT3G51850	osa_circ_034363	exonic	LOC_Os07g38120	Yes
Ath_circ_FC2340	exon	AT3G51850	osa_circ_034361	exonic	LOC_Os07g38120	Yes
Ath_circ_FC2342	exon	AT3G51895	osa_circ_018073	exonic	LOC_Os03g06520	Yes
Ath_circ_FC2343	exon	AT3G52140	osa_circ_016278	exonic	LOC_Os02g48620	Yes
Ath_circ_FC2346	exon	AT3G52140	osa_circ_016271	exonic	LOC_Os02g48620	Yes
Ath_circ_FC2353	exon	AT3G52720	osa_circ_023772	exonic	LOC_Os04g33660	Yes
Ath_circ_FC2354	exon	AT3G52840	osa_circ_018089	exonic	LOC_Os03g06940	Yes
Ath_circ_FC2357	exon	AT3G52930	osa_circ_005333	exonic	LOC_Os01g67860	Yes
Ath_circ_FC2358	exon	AT3G52930	osa_circ_005334	exonic	LOC_Os01g67860	Yes
Ath_circ_FC2359	exon	AT3G53020	osa_circ_028284	exonic	LOC_Os05g40820	Yes
Ath_circ_FC2367	exon	AT3G53260	osa_circ_015663	exonic	LOC_Os02g41670/LOC_Os02g41680	Yes
Ath_circ_FC2368	exon	AT3G53420	osa_circ_015674	exonic	LOC_Os02g41860	Yes
Ath_circ_FC2369	exon	AT3G53420	osa_circ_033650	exonic	LOC_Os07g26690	Yes
Ath_circ_FC2371	exon	AT3G53570	osa_circ_004777	exonic	LOC_Os01g62080	Yes
Ath_circ_FC2374	exon	AT3G54050	osa_circ_019046	exonic	LOC_Os03g16050	Yes
Ath_circ_FC2376	exon	AT3G54280	osa_circ_013215	intergenic	NA	Yes
Ath_circ_FC2378	exon	AT3G54300	osa_circ_033113	exonic	LOC_Os07g09600	Yes
Ath_circ_FC2382	exon	AT3G54640	osa_circ_033008	exonic	LOC_Os07g08430	Yes
Ath_circ_FC2383	exon	AT3G54650	osa_circ_020723	exonic	LOC_Os03g43390	Yes
Ath_circ_FC2384	exon	AT3G54890	osa_circ_030695	exonic	LOC_Os06g21590	Yes
Ath_circ_FC2385	exon	AT3G54890	osa_circ_030695	exonic	LOC_Os06g21590	Yes
Ath_circ_FC2387	exon	AT3G55010	osa_circ_022568	exonic	LOC_Os03g61600	Yes
Ath_circ_FC2392	exon	AT3G55330	osa_circ_036829	exonic	LOC_Os08g25900	Yes
Ath_circ_FC2394	exon	AT3G55440	osa_circ_000307	exonic	LOC_Os01g05490	Yes
Ath_circ_FC2396	exon	AT3G55450	osa_circ_008332	exonic	LOC_Os11g02830	Yes
Ath_circ_FC2401	exon	AT3G55630	osa_circ_017529	exonic	LOC_Os03g02030	Yes
Ath_circ_FC2402	exon	AT3G55630	osa_circ_017529	exonic	LOC_Os03g02030	Yes
Ath_circ_FC2404	exon	AT3G55800	osa_circ_023137	exonic	LOC_Os04g16680	Yes
Ath_circ_FC2405	exon	AT3G55800	osa_circ_023137	exonic	LOC_Os04g16680	Yes
Ath_circ_FC2406	exon	AT3G55800	osa_circ_023137	exonic	LOC_Os04g16680	Yes
Ath_circ_FC2407	exon	AT3G55800	osa_circ_023137	exonic	LOC_Os04g16680	Yes
Ath_circ_FC2410	exon	AT3G56040	osa_circ_028192	exonic	LOC_Os05g39230	Yes
Ath_circ_FC2411	exon	AT3G56310	osa_circ_035321	exonic	LOC_Os07g48160	Yes
Ath_circ_FC2415	exon	AT3G57090	osa_circ_027710	exonic	LOC_Os05g31770	Yes
Ath_circ_FC2416	exon	AT3G57290	osa_circ_033230	exonic	LOC_Os07g12110	Yes
Ath_circ_FC2417	exon	AT3G57300	osa_circ_019843	exonic	LOC_Os03g22900	Yes
Ath_circ_FC2418	exon	AT3G57300	osa_circ_019847	exonic	LOC_Os03g22900	Yes
Ath_circ_FC2420	exon	AT3G57410	osa_circ_019892	exonic	LOC_Os03g24220	Yes
Ath_circ_FC2423	exon	AT3G57530	osa_circ_034363	exonic	LOC_Os07g38120	Yes
Ath_circ_FC2426	exon	AT3G58160	osa_circ_003631	exonic	LOC_Os01g51634	Yes
Ath_circ_FC2427	exon	AT3G58510	osa_circ_033141	exonic	LOC_Os07g10250	Yes
Ath_circ_FC2431	exon	AT3G58750	osa_circ_013988	exonic	LOC_Os02g13840	Yes
Ath_circ_FC2433	exon	AT3G59020	osa_circ_023433	exonic	LOC_Os04g26850	Yes
Ath_circ_FC2434	exon	AT3G59020	osa_circ_014668	exonic	LOC_Os02g27470	Yes
Ath_circ_FC2440	exon	AT3G59920	osa_circ_027915	exonic	LOC_Os05g34540	Yes
Ath_circ_FC2442	exon	AT3G59970	osa_circ_022428	exonic	LOC_Os03g60090	Yes
Ath_circ_FC2443	exon	AT3G59970	osa_circ_022425	exonic	LOC_Os03g60090	Yes
Ath_circ_FC2444	exon	AT3G59990	osa_circ_012431	exonic	LOC_Os12g43370	Yes
Ath_circ_FC2452	exon	AT3G60750	osa_circ_029545	exonic	LOC_Os06g04270	Yes
Ath_circ_FC2453	exon	AT3G60750	osa_circ_029545	exonic	LOC_Os06g04270	Yes
Ath_circ_FC2454	exon	AT3G60750	osa_circ_029545	exonic	LOC_Os06g04270	Yes
Ath_circ_FC2455	exon	AT3G60750	osa_circ_029543	exonic	LOC_Os06g04270	Yes
Ath_circ_FC2456	exon	AT3G61080	osa_circ_017615	exonic	LOC_Os03g02640	Yes
Ath_circ_FC2458	exon	AT3G61150	osa_circ_008157	exonic	LOC_Os10g42490	Yes
Ath_circ_FC2463	exon	AT3G61420	osa_circ_036778	exonic	LOC_Os08g25060	Yes
Ath_circ_FC2464	exon	AT3G61420	osa_circ_036778	exonic	LOC_Os08g25060	Yes
Ath_circ_FC2465	exon	AT3G61420	osa_circ_036778	exonic	LOC_Os08g25060	Yes
Ath_circ_FC2467	exon	AT3G61430	osa_circ_015873	exonic	LOC_Os02g44630	Yes
Ath_circ_FC2469	exon	AT3G61700	osa_circ_000871	exonic	LOC_Os01g12080	Yes
Ath_circ_FC2470	exon	AT3G61860	osa_circ_022933	exonic	LOC_Os04g02870	Yes
Ath_circ_FC2472	exon	AT3G62010	osa_circ_020552	exonic	LOC_Os03g38970	Yes
Ath_circ_FC2476	exon	AT3G62120	osa_circ_011412	exonic	LOC_Os12g25710	Yes
Ath_circ_FC2478	exon	AT3G62330	osa_circ_001114	exonic	LOC_Os01g14920	Yes
Ath_circ_FC2481	exon	AT3G62770	osa_circ_026820	exonic	LOC_Os05g07710	Yes
Ath_circ_FC2483	Intergenic	n/a	osa_circ_019903	exonic	LOC_Os03g24380	Yes
Ath_circ_FC2486	exon	AT3G63310	osa_circ_032978	exonic	LOC_Os07g08070	Yes
Ath_circ_FC2488	Intergenic	n/a	osa_circ_024684	exonic	LOC_Os04g45240	Yes
Ath_circ_FC2489	Intergenic	n/a	osa_circ_024684	exonic	LOC_Os04g45240	Yes
Ath_circ_FC2494	exon	AT3G63490	osa_circ_027741	exonic	LOC_Os05g32220	Yes
Ath_circ_FC2495	exon	AT3G63490	osa_circ_027742	exonic	LOC_Os05g32220	Yes
Ath_circ_FC2497	exon	AT3G63520	osa_circ_012531	exonic	LOC_Os12g44310	Yes
Ath_circ_FC2498	exon	AT3G63520	osa_circ_012531	exonic	LOC_Os12g44310	Yes
Ath_circ_FC2501	exon	AT4G00090	osa_circ_022810	exonic	LOC_Os03g64110	Yes
Ath_circ_FC2502	exon	AT4G00100	osa_circ_035653	exonic	LOC_Os08g02400/LOC_Os08g02410	Yes
Ath_circ_FC2503	exon	AT4G00180	osa_circ_020825	exonic	LOC_Os03g44710	Yes
Ath_circ_FC2507	exon	AT4G00430	osa_circ_015873	exonic	LOC_Os02g44630	Yes
Ath_circ_FC2508	exon	AT4G00630	osa_circ_025990	exonic	LOC_Os04g58620	Yes
Ath_circ_FC2514	exon	AT4G01280	osa_circ_015973	exonic	LOC_Os02g45670	Yes
Ath_circ_FC2520	exon	AT4G02260	osa_circ_019725	exonic	LOC_Os03g22160	Yes
Ath_circ_FC2522	exon	AT4G02580	osa_circ_028468	exonic	LOC_Os05g43360	Yes
Ath_circ_FC2525	exon	AT4G02900	osa_circ_027775	exonic	LOC_Os05g32720	Yes
Ath_circ_FC2526	exon	AT4G02900	osa_circ_002026	exonic	LOC_Os01g35050	Yes
Ath_circ_FC2527	exon	AT4G02900	osa_circ_002026	exonic	LOC_Os01g35050	Yes
Ath_circ_FC2539	exon	AT4G03560	osa_circ_003218	exonic	LOC_Os01g48680	Yes
Ath_circ_FC2540	exon	AT4G03560	osa_circ_003218	exonic	LOC_Os01g48680	Yes
Ath_circ_FC2542	exon	AT4G04350	osa_circ_000159	exonic	LOC_Os01g03020	Yes
Ath_circ_FC2543	exon	AT4G04350	osa_circ_000156	exonic	LOC_Os01g03020	Yes
Ath_circ_FC2546	Intergenic	n/a	osa_circ_034039	exonic	LOC_Os07g33110	Yes
Ath_circ_FC2547	exon	AT4G04720	osa_circ_034039	exonic	LOC_Os07g33110	Yes
Ath_circ_FC2550	exon	AT4G04910	osa_circ_028541	exonic	LOC_Os05g44310	Yes
Ath_circ_FC2557	exon	AT4G05320	osa_circ_013225	exonic	LOC_Os02g06640	Yes
Ath_circ_FC2558	exon	AT4G05320	osa_circ_013226	exonic	LOC_Os02g06640	Yes
Ath_circ_FC2561	exon	AT4G07410	osa_circ_021686	exonic	LOC_Os03g52470	Yes
Ath_circ_FC2581	exon	AT4G10030	osa_circ_005127	exonic	LOC_Os01g66240	Yes
Ath_circ_FC2584	exon	AT4G10120	osa_circ_031674	exonic	LOC_Os06g43630	Yes
Ath_circ_FC2585	exon	AT4G10120	osa_circ_013532	exonic	LOC_Os02g09170	Yes
Ath_circ_FC2587	exon	AT4G10340	osa_circ_008935	exonic	LOC_Os11g13890	Yes
Ath_circ_FC2588	exon	AT4G10340	osa_circ_008935	exonic	LOC_Os11g13890	Yes
Ath_circ_FC2592	exon	AT4G10610	osa_circ_035635	exonic	LOC_Os08g02330	Yes
Ath_circ_FC2599	exon	AT4G11600	osa_circ_024823	exonic	LOC_Os04g46960	Yes
Ath_circ_FC2602	exon	AT4G11820	osa_circ_039890	exonic	LOC_Os09g34960	Yes
Ath_circ_FC2605	exon	AT4G12020	osa_circ_034638	exonic	LOC_Os07g40570	Yes
Ath_circ_FC2611	exon	AT4G12460	osa_circ_007944	exonic	LOC_Os10g40590	Yes
Ath_circ_FC2622	exon	AT4G13360	osa_circ_031282	intronic	LOC_Os06g39344	Yes
Ath_circ_FC2623	exon	AT4G13410	osa_circ_034879	exonic	LOC_Os07g43710	Yes
Ath_circ_FC2632	exon	AT4G13940	osa_circ_009294	exonic	LOC_Os11g26850	Yes
Ath_circ_FC2633	exon	AT4G13940	osa_circ_009284	exonic	LOC_Os11g26850	Yes
Ath_circ_FC2634	exon	AT4G14030	osa_circ_005479	exonic	LOC_Os01g68770	Yes
Ath_circ_FC2636	exon	AT4G14070	osa_circ_022688	exonic	LOC_Os03g62850	Yes
Ath_circ_FC2638	exon	AT4G14160	osa_circ_039471	exonic	LOC_Os09g28610	Yes
Ath_circ_FC2639	exon	AT4G14160	osa_circ_037339	exonic	LOC_Os08g36994	Yes
Ath_circ_FC2640	exon	AT4G14160	osa_circ_009250	exonic	LOC_Os11g24560	Yes
Ath_circ_FC2642	exon	AT4G14340	osa_circ_017106	exonic	LOC_Os02g56560	Yes
Ath_circ_FC2643	exon	AT4G14350	osa_circ_000627	exonic	LOC_Os01g09200	Yes
Ath_circ_FC2646	exon	AT4G14510	osa_circ_038985	exonic	LOC_Os09g19850	Yes
Ath_circ_FC2654	exon	AT4G14950	osa_circ_004183	exonic	LOC_Os01g57066	Yes
Ath_circ_FC2657	exon	AT4G15110	osa_circ_013393	exonic	LOC_Os02g07680	Yes
Ath_circ_FC2666	exon	AT4G16143	osa_circ_026643	exonic	LOC_Os05g06350	Yes
Ath_circ_FC2667	exon	AT4G16143	osa_circ_026645	exonic	LOC_Os05g06350	Yes
Ath_circ_FC2670	exon	AT4G16340	osa_circ_019603	exonic	LOC_Os03g21080	Yes
Ath_circ_FC2671	exon	AT4G16340	osa_circ_019603	exonic	LOC_Os03g21080	Yes
Ath_circ_FC2675	exon	AT4G16760	osa_circ_029285	exonic	LOC_Os06g01390	Yes
Ath_circ_FC2678	exon	AT4G17090	osa_circ_017865	exonic	LOC_Os03g04770	Yes
Ath_circ_FC2685	exon	AT4G17730	osa_circ_001154	exonic	LOC_Os01g15110	Yes
Ath_circ_FC2693	exon	AT4G18100	osa_circ_039714	exonic	LOC_Os09g32520/LOC_Os09g32532	Yes
Ath_circ_FC2698	exon	AT4G18570	osa_circ_029050	exonic	LOC_Os05g49820	Yes
Ath_circ_FC2699	exon	AT4G18570	osa_circ_029050	exonic	LOC_Os05g49820	Yes
Ath_circ_FC2702	exon	AT4G18950	osa_circ_003870	exonic	LOC_Os01g54480	Yes
Ath_circ_FC2704	exon	AT4G19210	osa_circ_009565	exonic	LOC_Os11g34350	Yes
Ath_circ_FC2709	exon	AT4G19490	osa_circ_023093	exonic	LOC_Os04g13470	Yes
Ath_circ_FC2711	exon	AT4G19520	osa_circ_009093	exonic	LOC_Os11g18366	Yes
Ath_circ_FC2712	exon	AT4G19600	osa_circ_011494	exonic	LOC_Os12g30020	Yes
Ath_circ_FC2713	exon	AT4G19600	osa_circ_008514	exonic	LOC_Os11g05850	Yes
Ath_circ_FC2714	exon	AT4G19600	osa_circ_008514	exonic	LOC_Os11g05850	Yes
Ath_circ_FC2716	exon	AT4G19670	osa_circ_012441	exonic	LOC_Os12g43560	Yes
Ath_circ_FC2717	exon	AT4G19710	osa_circ_036795	exonic	LOC_Os08g25390	Yes
Ath_circ_FC2718	exon	AT4G19710	osa_circ_036793	exonic	LOC_Os08g25390	Yes
Ath_circ_FC2720	exon	AT4G19860	osa_circ_025243	exonic	LOC_Os04g52500	Yes
Ath_circ_FC2729	exon	AT4G20400	osa_circ_026933	exonic	LOC_Os05g10770	Yes
Ath_circ_FC2736	exon	AT4G20930	osa_circ_031994	exonic	LOC_Os06g46372	Yes
Ath_circ_FC2738	exon	AT4G21160	osa_circ_013669	exonic	LOC_Os02g10480	Yes
Ath_circ_FC2739	exon	AT4G21160	osa_circ_013669	exonic	LOC_Os02g10480	Yes
Ath_circ_FC2740	exon	AT4G21280	osa_circ_034176	exonic	LOC_Os07g36090/LOC_Os07g36080	Yes
Ath_circ_FC2741	Intergenic	n/a	osa_circ_034285	exonic	LOC_Os07g37580	Yes
Ath_circ_FC2742	exon	AT4G21550	osa_circ_035328	exonic	LOC_Os07g48200	Yes
Ath_circ_FC2745	exon	AT4G21670	osa_circ_015732	exonic	LOC_Os02g42600	Yes
Ath_circ_FC2747	exon	AT4G21750	osa_circ_025419	exonic	LOC_Os04g53540	Yes
Ath_circ_FC2753	exon	AT4G22930	osa_circ_003864	exonic	LOC_Os01g54370	Yes
Ath_circ_FC2754	exon	AT4G22990	osa_circ_029509	exonic	LOC_Os06g03860	Yes
Ath_circ_FC2756	exon	AT4G23100	osa_circ_026422	exonic	LOC_Os05g03820	Yes
Ath_circ_FC2757	exon	AT4G23100	osa_circ_026422	exonic	LOC_Os05g03820	Yes
Ath_circ_FC2758	exon	AT4G23100	osa_circ_026422	exonic	LOC_Os05g03820	Yes
Ath_circ_FC2759	exon	AT4G23100	osa_circ_026422	exonic	LOC_Os05g03820	Yes
Ath_circ_FC2768	exon	AT4G23850	osa_circ_003067	exonic	LOC_Os01g46750	Yes
Ath_circ_FC2769	exon	AT4G23850	osa_circ_003061	exonic	LOC_Os01g46750	Yes
Ath_circ_FC2770	exon	AT4G23850	osa_circ_003066	exonic	LOC_Os01g46750	Yes
Ath_circ_FC2776	exon	AT4G23980	osa_circ_005630	exonic	LOC_Os01g70270	Yes
Ath_circ_FC2777	exon	AT4G24100	osa_circ_007695	exonic	LOC_Os10g37480	Yes
Ath_circ_FC2779	exon	AT4G24190	osa_circ_032360	exonic	LOC_Os06g50300	Yes
Ath_circ_FC2780	exon	AT4G24190	osa_circ_032371	exonic	LOC_Os06g50300	Yes
Ath_circ_FC2781	exon	AT4G24190	osa_circ_032371	exonic	LOC_Os06g50300	Yes
Ath_circ_FC2783	exon	AT4G24280	osa_circ_027328	exonic	LOC_Os05g23740	Yes
Ath_circ_FC2785	exon	AT4G24290	osa_circ_032903	exonic	LOC_Os07g07194	Yes
Ath_circ_FC2786	exon	AT4G24290	osa_circ_032903	exonic	LOC_Os07g07194	Yes
Ath_circ_FC2787	exon	AT4G24290	osa_circ_005897	exonic	LOC_Os01g72860	Yes
Ath_circ_FC2788	exon	AT4G24400	osa_circ_002063	exonic	LOC_Os01g35184	Yes
Ath_circ_FC2795	exon	AT4G24800	osa_circ_035674	exonic	LOC_Os08g02690	Yes
Ath_circ_FC2810	exon	AT4G25630	osa_circ_026837	exonic	LOC_Os05g08360	Yes
Ath_circ_FC2816	exon	AT4G26100	osa_circ_024568	exonic	LOC_Os04g43490	Yes
Ath_circ_FC2817	exon	AT4G26100	osa_circ_003564	exonic	LOC_Os01g51200	Yes
Ath_circ_FC2818	exon	AT4G26110	osa_circ_029686	exonic	LOC_Os06g05660	Yes
Ath_circ_FC2822	Intergenic	n/a	osa_circ_005341	exonic	LOC_Os01g67860	Yes
Ath_circ_FC2823	exon	AT4G26640	osa_circ_011555	exonic	LOC_Os12g32250	Yes
Ath_circ_FC2825	exon	AT4G26850	osa_circ_010745	exonic	LOC_Os12g08810	Yes
Ath_circ_FC2826	exon	AT4G26900	osa_circ_018950	exonic	LOC_Os03g15120	Yes
Ath_circ_FC2828	exon	AT4G26940	osa_circ_013311	exonic	LOC_Os02g06840	Yes
Ath_circ_FC2832	exon	AT4G27120	osa_circ_032555	exonic	LOC_Os07g01320	Yes
Ath_circ_FC2839	exon	AT4G27640	osa_circ_018971	exonic	LOC_Os03g15540	Yes
Ath_circ_FC2844	exon	AT4G27910	osa_circ_002980	exonic	LOC_Os01g46700	Yes
Ath_circ_FC2845	exon	AT4G27940	osa_circ_036946	exonic	LOC_Os08g29720	Yes
Ath_circ_FC2849	exon	AT4G28080	osa_circ_025608	exonic	LOC_Os04g55230	Yes
Ath_circ_FC2850	exon	AT4G28080	osa_circ_033566	exonic	LOC_Os07g23990	Yes
Ath_circ_FC2851	exon	AT4G28080	osa_circ_033559	exonic	LOC_Os07g23990	Yes
Ath_circ_FC2854	exon	AT4G28080	osa_circ_033561	exonic	LOC_Os07g23990	Yes
Ath_circ_FC2857	exon	AT4G28220	osa_circ_035822	exonic	LOC_Os08g04630	Yes
Ath_circ_FC2858	exon	AT4G28470	osa_circ_013127	exonic	LOC_Os02g05340	Yes
Ath_circ_FC2860	exon	AT4G28710	osa_circ_014959	intergenic	NA	Yes
Ath_circ_FC2861	exon	AT4G28710	osa_circ_014959	intergenic	NA	Yes
Ath_circ_FC2862	exon	AT4G28880	osa_circ_014269	exonic	LOC_Os02g17910	Yes
Ath_circ_FC2863	exon	AT4G28880	osa_circ_014269	exonic	LOC_Os02g17910	Yes
Ath_circ_FC2866	exon	AT4G29010	osa_circ_014236	exonic	LOC_Os02g17390	Yes
Ath_circ_FC2869	intron	AT4G29060	osa_circ_011912	exonic	LOC_Os12g35630	Yes
Ath_circ_FC2873	exon	AT4G29220	osa_circ_000676	exonic	LOC_Os01g09570	Yes
Ath_circ_FC2883	exon	AT4G30360	osa_circ_029980	exonic	LOC_Os06g08850	Yes
Ath_circ_FC2884	exon	AT4G30520	osa_circ_036068	exonic	LOC_Os08g07760/LOC_Os08g07774	Yes
Ath_circ_FC2888	exon	AT4G30810	osa_circ_029961	exonic	LOC_Os06g08720	Yes
Ath_circ_FC2891	exon	AT4G30900	osa_circ_027233	exonic	LOC_Os05g19974	Yes
Ath_circ_FC2892	exon	AT4G30900	osa_circ_027233	exonic	LOC_Os05g19974	Yes
Ath_circ_FC2894	exon	AT4G31170	osa_circ_031870	exonic	LOC_Os06g45300	Yes
Ath_circ_FC2895	exon	AT4G31180	osa_circ_013077	exonic	LOC_Os02g04690/LOC_Os02g04710	Yes
Ath_circ_FC2897	exon	AT4G31300	osa_circ_029611	exonic	LOC_Os06g04800	Yes
Ath_circ_FC2898	exon	AT4G31390	osa_circ_008860	exonic	LOC_Os11g11000	Yes
Ath_circ_FC2899	exon	AT4G31390	osa_circ_008860	exonic	LOC_Os11g11000	Yes
Ath_circ_FC2905	exon	AT4G31580	osa_circ_029975	exonic	LOC_Os06g08840	Yes
Ath_circ_FC2907	exon	AT4G31700	osa_circ_034816	exonic	LOC_Os07g42950	Yes
Ath_circ_FC2910	exon	AT4G31860	osa_circ_031800	exonic	LOC_Os06g44210	Yes
Ath_circ_FC2914	exon	AT4G32040	osa_circ_036609	exonic	LOC_Os08g19650	Yes
Ath_circ_FC2918	exon	AT4G32285	osa_circ_019127	exonic	LOC_Os03g16800	Yes
Ath_circ_FC2919	exon	AT4G32320	osa_circ_037742	exonic	LOC_Os08g41090	Yes
Ath_circ_FC2922	exon	AT4G32330	osa_circ_031320	exonic	LOC_Os06g40450	Yes
Ath_circ_FC2924	exon	AT4G32410	osa_circ_022368	exonic	LOC_Os03g59340	Yes
Ath_circ_FC2925	exon	AT4G32410	osa_circ_026844	exonic	LOC_Os05g08370	Yes
Ath_circ_FC2926	exon	AT4G32410	osa_circ_026844	exonic	LOC_Os05g08370	Yes
Ath_circ_FC2927	exon	AT4G32410	osa_circ_026844	exonic	LOC_Os05g08370	Yes
Ath_circ_FC2930	exon	AT4G32551	osa_circ_002531	exonic	LOC_Os01g42260	Yes
Ath_circ_FC2934	exon	AT4G32660	osa_circ_011450	exonic	LOC_Os12g27520	Yes
Ath_circ_FC2936	exon	AT4G32760	osa_circ_000929	exonic	LOC_Os01g12880	Yes
Ath_circ_FC2939	exon	AT4G32830	osa_circ_000689	exonic	LOC_Os01g09580	Yes
Ath_circ_FC2941	exon	AT4G32920	osa_circ_026883	exonic	LOC_Os05g09360	Yes
Ath_circ_FC2942	exon	AT4G32920	osa_circ_000631	exonic	LOC_Os01g09246	Yes
Ath_circ_FC2943	exon	AT4G33000	osa_circ_014330	exonic	LOC_Os02g18930	Yes
Ath_circ_FC2944	exon	AT4G33010	osa_circ_003603	exonic	LOC_Os01g51410	Yes
Ath_circ_FC2945	exon	AT4G33010	osa_circ_003603	exonic	LOC_Os01g51410	Yes
Ath_circ_FC2946	exon	AT4G33010	osa_circ_003601	exonic	LOC_Os01g51410	Yes
Ath_circ_FC2947	exon	AT4G33060	osa_circ_002339	exonic	LOC_Os01g40050	Yes
Ath_circ_FC2950	exon	AT4G33080	osa_circ_000624	exonic	LOC_Os01g09200	Yes
Ath_circ_FC2951	exon	AT4G33090	osa_circ_037001	exonic	LOC_Os08g30810	Yes
Ath_circ_FC2952	exon	AT4G33090	osa_circ_037001	exonic	LOC_Os08g30810	Yes
Ath_circ_FC2953	exon	AT4G33090	osa_circ_037001	exonic	LOC_Os08g30810	Yes
Ath_circ_FC2955	exon	AT4G33240	osa_circ_037248	exonic	LOC_Os08g34950	Yes
Ath_circ_FC2957	Intergenic	n/a	osa_circ_025054	exonic	LOC_Os04g51110	Yes
Ath_circ_FC2958	exon	AT4G33270	osa_circ_025054	exonic	LOC_Os04g51110	Yes
Ath_circ_FC2959	exon	AT4G33380	osa_circ_030176	exonic	LOC_Os06g11070	Yes
Ath_circ_FC2966	exon	AT4G33650	osa_circ_023583	exonic	LOC_Os04g31190	Yes
Ath_circ_FC2979	intron	AT4G34050	osa_circ_037501	exonic	LOC_Os08g38900/LOC_Os08g38920	Yes
Ath_circ_FC2980	exon	AT4G34050	osa_circ_037501	exonic	LOC_Os08g38900/LOC_Os08g38920	Yes
Ath_circ_FC2983	exon	AT4G34100	osa_circ_031481	exonic	LOC_Os06g43210	Yes
Ath_circ_FC2991	exon	AT4G34450	osa_circ_033130	exonic	LOC_Os07g10150	Yes
Ath_circ_FC2992	exon	AT4G34450	osa_circ_033131	exonic	LOC_Os07g10150	Yes
Ath_circ_FC2997	exon	AT4G34640	osa_circ_022338	exonic	LOC_Os03g59040	Yes
Ath_circ_FC2998	exon	AT4G34640	osa_circ_022338	exonic	LOC_Os03g59040	Yes
Ath_circ_FC3000	exon	AT4G34670	osa_circ_014306	exonic	LOC_Os02g18550	Yes
Ath_circ_FC3004	exon	AT4G35090	osa_circ_032452	exonic	LOC_Os06g51150	Yes
Ath_circ_FC3011	exon	AT4G35785	osa_circ_032412	exonic	LOC_Os06g50890	Yes
Ath_circ_FC3012	exon	AT4G35785	osa_circ_032412	exonic	LOC_Os06g50890	Yes
Ath_circ_FC3014	exon	AT4G35790	osa_circ_040086	exonic	LOC_Os09g37100	Yes
Ath_circ_FC3015	exon	AT4G35850	osa_circ_026556	exonic	LOC_Os05g05320	Yes
Ath_circ_FC3025	Intergenic	n/a	osa_circ_007644	exonic	LOC_Os10g36780	Yes
Ath_circ_FC3026	Intergenic	n/a	osa_circ_007644	exonic	LOC_Os10g36780	Yes
Ath_circ_FC3030	exon	AT4G36360	osa_circ_002328	exonic	LOC_Os01g39830	Yes
Ath_circ_FC3031	exon	AT4G36360	osa_circ_002328	exonic	LOC_Os01g39830	Yes
Ath_circ_FC3039	exon	AT4G37040	osa_circ_016664	exonic	LOC_Os02g52420	Yes
Ath_circ_FC3044	exon	AT4G37930	osa_circ_021790	exonic	LOC_Os03g52840	Yes
Ath_circ_FC3045	exon	AT4G37930	osa_circ_021790	exonic	LOC_Os03g52840	Yes
Ath_circ_FC3049	exon	AT4G38200	osa_circ_013601	intergenic	NA	Yes
Ath_circ_FC3050	exon	AT4G38200	osa_circ_018847	exonic	LOC_Os03g14260	Yes
Ath_circ_FC3051	exon	AT4G38230	osa_circ_015986	exonic	LOC_Os02g46090	Yes
Ath_circ_FC3054	exon	AT4G38270	osa_circ_006599	exonic	LOC_Os10g21890	Yes
Ath_circ_FC3055	exon	AT4G38470	osa_circ_040091	exonic	LOC_Os09g37230	Yes
Ath_circ_FC3056	exon	AT4G38510	osa_circ_031206	exonic	LOC_Os06g37180	Yes
Ath_circ_FC3057	exon	AT4G38510	osa_circ_031211	exonic	LOC_Os06g37180	Yes
Ath_circ_FC3065	exon	AT4G38970	osa_circ_008629	exonic	LOC_Os11g07020	Yes
Ath_circ_FC3066	exon	AT4G39080	osa_circ_006353	exonic	LOC_Os10g10500	Yes
Ath_circ_FC3067	exon	AT4G39080	osa_circ_006353	exonic	LOC_Os10g10500	Yes
Ath_circ_FC3068	exon	AT4G39100	osa_circ_037079	exonic	LOC_Os08g32620	Yes
Ath_circ_FC3069	exon	AT4G39150	osa_circ_003538	exonic	LOC_Os01g50700	Yes
Ath_circ_FC3070	exon	AT4G39150	osa_circ_039687	exonic	LOC_Os09g32050	Yes
Ath_circ_FC3071	exon	AT4G39150	osa_circ_039687	exonic	LOC_Os09g32050	Yes
Ath_circ_FC3072	exon	AT4G39150	osa_circ_039687	exonic	LOC_Os09g32050	Yes
Ath_circ_FC3073	exon	AT4G39170	osa_circ_013007	exonic	LOC_Os02g04020	Yes
Ath_circ_FC3084	exon	AT4G39860	osa_circ_034840	exonic	LOC_Os07g43070	Yes
Ath_circ_FC3085	exon	AT4G39980	osa_circ_034826	exonic	LOC_Os07g42960	Yes
Ath_circ_FC3086	exon	AT4G39980	osa_circ_034826	exonic	LOC_Os07g42960	Yes
Ath_circ_FC3087	exon	AT4G39980	osa_circ_034821	exonic	LOC_Os07g42960	Yes
Ath_circ_FC3088	exon	AT4G40030	osa_circ_029761	exonic	LOC_Os06g06450/LOC_Os06g06470	Yes
Ath_circ_FC3090	exon	AT5G01020	osa_circ_008335	intergenic	NA	Yes
Ath_circ_FC3091	exon	AT5G01020	osa_circ_008335	intergenic	NA	Yes
Ath_circ_FC3106	exon	AT5G01990	osa_circ_004604	exonic	LOC_Os01g60230	Yes
Ath_circ_FC3108	exon	AT5G02290	osa_circ_002381	exonic	LOC_Os01g40590	Yes
Ath_circ_FC3112	exon	AT5G02500	osa_circ_010101	exonic	LOC_Os11g47760	Yes
Ath_circ_FC3113	exon	AT5G02500	osa_circ_022483	exonic	LOC_Os03g60620	Yes
Ath_circ_FC3114	exon	AT5G02500	osa_circ_022483	exonic	LOC_Os03g60620	Yes
Ath_circ_FC3115	exon	AT5G02500	osa_circ_022483	exonic	LOC_Os03g60620	Yes
Ath_circ_FC3119	exon	AT5G02960	osa_circ_004733	exonic	LOC_Os01g61814	Yes
Ath_circ_FC3127	exon	AT5G03290	osa_circ_001304	exonic	LOC_Os01g16900	Yes
Ath_circ_FC3129	exon	AT5G03540	osa_circ_026047	exonic	LOC_Os04g58880	Yes
Ath_circ_FC3130	exon	AT5G03540	osa_circ_026047	exonic	LOC_Os04g58880	Yes
Ath_circ_FC3132	exon	AT5G03650	osa_circ_023750	exonic	LOC_Os04g33460	Yes
Ath_circ_FC3133	exon	AT5G03650	osa_circ_014888	exonic	LOC_Os02g32660	Yes
Ath_circ_FC3134	exon	AT5G03650	osa_circ_014888	exonic	LOC_Os02g32660	Yes
Ath_circ_FC3136	exon	AT5G03730	osa_circ_014884	exonic	LOC_Os02g32610	Yes
Ath_circ_FC3141	exon	AT5G04090	osa_circ_013046	exonic	LOC_Os02g04450	Yes
Ath_circ_FC3142	exon	AT5G04140	osa_circ_035138	exonic	LOC_Os07g46460	Yes
Ath_circ_FC3143	exon	AT5G04140	osa_circ_035126	exonic	LOC_Os07g46460	Yes
Ath_circ_FC3145	exon	AT5G04410	osa_circ_038107	exonic	LOC_Os08g44820	Yes
Ath_circ_FC3147	exon	AT5G04420	osa_circ_011899	exonic	LOC_Os12g35560	Yes
Ath_circ_FC3149	exon	AT5G04540	osa_circ_038024	exonic	LOC_Os08g44260	Yes
Ath_circ_FC3150	exon	AT5G04560	osa_circ_000839	exonic	LOC_Os01g11900	Yes
Ath_circ_FC3151	exon	AT5G04560	osa_circ_000843	exonic	LOC_Os01g11900	Yes
Ath_circ_FC3155	exon	AT5G04710	osa_circ_005981	exonic	LOC_Os01g73680	Yes
Ath_circ_FC3157	exon	AT5G04870	osa_circ_025001	exonic	LOC_Os04g49510	Yes
Ath_circ_FC3160	exon	AT5G05010	osa_circ_027378	exonic	LOC_Os05g24601	Yes
Ath_circ_FC3161	exon	AT5G05080	osa_circ_031848	exonic	LOC_Os06g45000	Yes
Ath_circ_FC3162	exon	AT5G05080	osa_circ_031848	exonic	LOC_Os06g45000	Yes
Ath_circ_FC3163	exon	AT5G05080	osa_circ_031848	exonic	LOC_Os06g45000	Yes
Ath_circ_FC3170	exon	AT5G05610	osa_circ_033262	exonic	LOC_Os07g12910	Yes
Ath_circ_FC3171	exon	AT5G05620	osa_circ_026669	exonic	LOC_Os05g06450	Yes
Ath_circ_FC3174	exon	AT5G06120	osa_circ_020662	exonic	LOC_Os03g42050	Yes
Ath_circ_FC3181	exon	AT5G06220	osa_circ_037397	exonic	LOC_Os08g37610	Yes
Ath_circ_FC3182	exon	AT5G06220	osa_circ_037397	exonic	LOC_Os08g37610	Yes
Ath_circ_FC3186	exon	AT5G06530	osa_circ_018013	exonic	LOC_Os03g06139	Yes
Ath_circ_FC3188	exon	AT5G06600	osa_circ_032870	exonic	LOC_Os07g06950	Yes
Ath_circ_FC3191	exon	AT5G06970	osa_circ_021000	exonic	LOC_Os03g47930	Yes
Ath_circ_FC3193	exon	AT5G07130	osa_circ_019372	exonic	LOC_Os03g18640	Yes
Ath_circ_FC3194	exon	AT5G07350	osa_circ_014835	exonic	LOC_Os02g32350	Yes
Ath_circ_FC3195	exon	AT5G07350	osa_circ_014841	exonic	LOC_Os02g32350	Yes
Ath_circ_FC3196	exon	AT5G08280	osa_circ_013352	exonic	LOC_Os02g07230	Yes
Ath_circ_FC3197	exon	AT5G08370	osa_circ_035323	exonic	LOC_Os07g48160	Yes
Ath_circ_FC3198	exon	AT5G08390	osa_circ_007290	exonic	LOC_Os10g35200	Yes
Ath_circ_FC3205	exon	AT5G08530	osa_circ_035013	exonic	LOC_Os07g45090	Yes
Ath_circ_FC3209	exon	AT5G08680	osa_circ_028819	exonic	LOC_Os05g47980	Yes
Ath_circ_FC3210	exon	AT5G08680	osa_circ_003329	exonic	LOC_Os01g49190	Yes
Ath_circ_FC3211	exon	AT5G09220	osa_circ_032699	exonic	LOC_Os07g04180	Yes
Ath_circ_FC3214	exon	AT5G09660	osa_circ_022079	exonic	LOC_Os03g56280	Yes
Ath_circ_FC3215	Intergenic	n/a	osa_circ_021813	exonic	LOC_Os03g53110	Yes
Ath_circ_FC3217	Intergenic	n/a	osa_circ_007562	intergenic	NA	Yes
Ath_circ_FC3219	exon	AT5G09870	osa_circ_033322	exonic	LOC_Os07g14850	Yes
Ath_circ_FC3227	exon	AT5G10630	osa_circ_000132	exonic	LOC_Os01g02720	Yes
Ath_circ_FC3231	exon	AT5G10840	osa_circ_038008	intergenic	NA	Yes
Ath_circ_FC3241	exon	AT5G11700	osa_circ_000631	exonic	LOC_Os01g09246	Yes
Ath_circ_FC3242	exon	AT5G11700	osa_circ_000631	exonic	LOC_Os01g09246	Yes
Ath_circ_FC3244	exon	AT5G11790	osa_circ_013951	exonic	LOC_Os02g13150	Yes
Ath_circ_FC3252	exon	AT5G12230	osa_circ_012302	exonic	LOC_Os12g41962	Yes
Ath_circ_FC3253	exon	AT5G12230	osa_circ_012302	exonic	LOC_Os12g41962	Yes
Ath_circ_FC3254	exon	AT5G12230	osa_circ_012302	exonic	LOC_Os12g41962	Yes
Ath_circ_FC3255	exon	AT5G12370	osa_circ_010939	exonic	LOC_Os12g13590	Yes
Ath_circ_FC3258	exon	AT5G12480	osa_circ_034363	exonic	LOC_Os07g38120	Yes
Ath_circ_FC3262	exon	AT5G13000	osa_circ_017738	exonic	LOC_Os03g03610	Yes
Ath_circ_FC3263	exon	AT5G13000	osa_circ_032500	exonic	LOC_Os06g51270	Yes
Ath_circ_FC3264	exon	AT5G13000	osa_circ_017382	exonic	LOC_Os02g58554	Yes
Ath_circ_FC3265	exon	AT5G13000	osa_circ_017382	exonic	LOC_Os02g58554	Yes
Ath_circ_FC3266	exon	AT5G13030	osa_circ_030698	exonic	LOC_Os06g21600	Yes
Ath_circ_FC3268	exon	AT5G13110	osa_circ_033452	exonic	LOC_Os07g22350	Yes
Ath_circ_FC3269	exon	AT5G13120	osa_circ_026155	exonic	LOC_Os05g01270	Yes
Ath_circ_FC3271	exon	AT5G13300	osa_circ_015703	exonic	LOC_Os02g42134	Yes
Ath_circ_FC3272	exon	AT5G13300	osa_circ_015703	exonic	LOC_Os02g42134	Yes
Ath_circ_FC3280	exon	AT5G13550	osa_circ_038515	exonic	LOC_Os09g06499	Yes
Ath_circ_FC3286	exon	AT5G13650	osa_circ_014298	exonic	LOC_Os02g18450	Yes
Ath_circ_FC3289	exon	AT5G13710	osa_circ_033178	exonic	LOC_Os07g10600	Yes
Ath_circ_FC3290	exon	AT5G13840	osa_circ_006023	exonic	LOC_Os01g74146	Yes
Ath_circ_FC3291	exon	AT5G13840	osa_circ_006023	exonic	LOC_Os01g74146	Yes
Ath_circ_FC3293	exon	AT5G13980	osa_circ_009461	exonic	LOC_Os11g32260	Yes
Ath_circ_FC3294	exon	AT5G14060	osa_circ_022731	exonic	LOC_Os03g63330	Yes
Ath_circ_FC3295	exon	AT5G14060	osa_circ_022733	exonic	LOC_Os03g63330	Yes
Ath_circ_FC3299	exon	AT5G14320	osa_circ_021156	exonic	LOC_Os03g49710	Yes
Ath_circ_FC3301	exon	AT5G14590	osa_circ_002966	exonic	LOC_Os01g46610	Yes
Ath_circ_FC3302	exon	AT5G14640	osa_circ_014016	exonic	LOC_Os02g14130	Yes
Ath_circ_FC3309	exon	AT5G15020	osa_circ_026127	exonic	LOC_Os05g01020	Yes
Ath_circ_FC3312	exon	AT5G15070	osa_circ_004179	exonic	LOC_Os01g56980	Yes
Ath_circ_FC3314	exon	AT5G15540	osa_circ_032615	exonic	LOC_Os07g01940	Yes
Ath_circ_FC3316	exon	AT5G15630	osa_circ_021944	exonic	LOC_Os03g54750	Yes
Ath_circ_FC3317	exon	AT5G15650	osa_circ_034686	exonic	LOC_Os07g41360	Yes
Ath_circ_FC3320	exon	AT5G15810	osa_circ_006573	exonic	LOC_Os10g21360	Yes
Ath_circ_FC3321	exon	AT5G15810	osa_circ_006573	exonic	LOC_Os10g21360	Yes
Ath_circ_FC3330	exon	AT5G16210	osa_circ_001947	exonic	LOC_Os01g33060	Yes
Ath_circ_FC3331	exon	AT5G16210	osa_circ_001947	exonic	LOC_Os01g33060	Yes
Ath_circ_FC3337	exon	AT5G16540	osa_circ_011274	exonic	LOC_Os12g21700	Yes
Ath_circ_FC3338	exon	AT5G16570	osa_circ_025777	exonic	LOC_Os04g56400	Yes
Ath_circ_FC3340	exon	AT5G16715	osa_circ_032862	exonic	LOC_Os07g06940	Yes
Ath_circ_FC3341	exon	AT5G16780	osa_circ_014755	exonic	LOC_Os02g30730	Yes
Ath_circ_FC3342	exon	AT5G16890	osa_circ_004537	exonic	LOC_Os01g59630	Yes
Ath_circ_FC3343	exon	AT5G16930	osa_circ_016055	exonic	LOC_Os02g46990	Yes
Ath_circ_FC3349	Intergenic	n/a	osa_circ_040150	exonic	LOC_Os09g38030	Yes
Ath_circ_FC3351	exon	AT5G17400	osa_circ_027324	exonic	LOC_Os05g23720	Yes
Ath_circ_FC3352	exon	AT5G17420	osa_circ_026844	exonic	LOC_Os05g08370	Yes
Ath_circ_FC3354	exon	AT5G17770	osa_circ_004569	exonic	LOC_Os01g59930	Yes
Ath_circ_FC3356	exon	AT5G17920	osa_circ_012407	exonic	LOC_Os12g42876/LOC_Os12g42884	Yes
Ath_circ_FC3357	exon	AT5G17920	osa_circ_012406	exonic	LOC_Os12g42876/LOC_Os12g42884	Yes
Ath_circ_FC3358	exon	AT5G17920	osa_circ_012407	exonic	LOC_Os12g42876/LOC_Os12g42884	Yes
Ath_circ_FC3362	exon	AT5G18190	osa_circ_004106	exonic	LOC_Os01g56580	Yes
Ath_circ_FC3372	exon	AT5G18410	osa_circ_017894	exonic	LOC_Os03g05020	Yes
Ath_circ_FC3373	exon	AT5G18420	osa_circ_008924	exonic	LOC_Os11g13694	Yes
Ath_circ_FC3374	exon	AT5G18580	osa_circ_026587	exonic	LOC_Os05g05710	Yes
Ath_circ_FC3375	exon	AT5G18590	osa_circ_009905	exonic	LOC_Os11g43590	Yes
Ath_circ_FC3376	exon	AT5G18620	osa_circ_026599	exonic	LOC_Os05g05780	Yes
Ath_circ_FC3377	Intergenic	n/a	osa_circ_009900	exonic	LOC_Os11g43510	Yes
Ath_circ_FC3378	Intergenic	n/a	osa_circ_027668	exonic	LOC_Os05g30900	Yes
Ath_circ_FC3379	exon	AT5G18760	osa_circ_013324	exonic	LOC_Os02g06920	Yes
Ath_circ_FC3380	exon	AT5G18810	osa_circ_019929	exonic	LOC_Os03g24890	Yes
Ath_circ_FC3381	exon	AT5G18830	osa_circ_027862	exonic	LOC_Os05g33810	Yes
Ath_circ_FC3382	exon	AT5G18830	osa_circ_027862	exonic	LOC_Os05g33810	Yes
Ath_circ_FC3385	exon	AT5G19010	osa_circ_009055	exonic	LOC_Os11g17080	Yes
Ath_circ_FC3386	exon	AT5G19010	osa_circ_026524	exonic	LOC_Os05g05160	Yes
Ath_circ_FC3389	exon	AT5G19150	osa_circ_010473	exonic	LOC_Os12g05050	Yes
Ath_circ_FC3393	exon	AT5G19330	osa_circ_027788	exonic	LOC_Os05g33050	Yes
Ath_circ_FC3394	exon	AT5G19330	osa_circ_027788	exonic	LOC_Os05g33050	Yes
Ath_circ_FC3395	exon	AT5G19350	osa_circ_039477	exonic	LOC_Os09g28810	Yes
Ath_circ_FC3396	exon	AT5G19370	osa_circ_035388	exonic	LOC_Os07g48810	Yes
Ath_circ_FC3397	exon	AT5G19370	osa_circ_035388	exonic	LOC_Os07g48810	Yes
Ath_circ_FC3398	exon	AT5G19370	osa_circ_035388	exonic	LOC_Os07g48810	Yes
Ath_circ_FC3399	exon	AT5G19390	osa_circ_035102	exonic	LOC_Os07g46450	Yes
Ath_circ_FC3400	exon	AT5G19390	osa_circ_019877	exonic	LOC_Os03g24180	Yes
Ath_circ_FC3401	exon	AT5G19390	osa_circ_019877	exonic	LOC_Os03g24180	Yes
Ath_circ_FC3402	exon	AT5G19400	osa_circ_036646	exonic	LOC_Os08g21350	Yes
Ath_circ_FC3403	exon	AT5G19440	osa_circ_001993	exonic	LOC_Os01g34480	Yes
Ath_circ_FC3406	exon	AT5G19540	osa_circ_036959	exonic	LOC_Os08g29770/LOC_Os08g29780	Yes
Ath_circ_FC3407	exon	AT5G19550	osa_circ_003975	exonic	LOC_Os01g55540	Yes
Ath_circ_FC3408	exon	AT5G19550	osa_circ_003975	exonic	LOC_Os01g55540	Yes
Ath_circ_FC3409	exon	AT5G19550	osa_circ_003975	exonic	LOC_Os01g55540	Yes
Ath_circ_FC3416	exon	AT5G19690	osa_circ_025928	exonic	LOC_Os04g57890	Yes
Ath_circ_FC3418	exon	AT5G19780	osa_circ_034485	exonic	LOC_Os07g38730	Yes
Ath_circ_FC3419	exon	AT5G19820	osa_circ_021124	exonic	LOC_Os03g49420	Yes
Ath_circ_FC3420	exon	AT5G19820	osa_circ_021121	exonic	LOC_Os03g49420	Yes
Ath_circ_FC3423	exon	AT5G20000	osa_circ_013738	exonic	LOC_Os02g11050	Yes
Ath_circ_FC3424	Intergenic	n/a	osa_circ_029055	exonic	LOC_Os05g49890	Yes
Ath_circ_FC3427	exon	AT5G20290	osa_circ_014687	exonic	LOC_Os02g28810	Yes
Ath_circ_FC3428	exon	AT5G20490	osa_circ_030906	exonic	LOC_Os06g29350	Yes
Ath_circ_FC3429	exon	AT5G20490	osa_circ_030906	exonic	LOC_Os06g29350	Yes
Ath_circ_FC3430	exon	AT5G20620	osa_circ_013233	exonic	LOC_Os02g06640	Yes
Ath_circ_FC3434	exon	AT5G20720	osa_circ_030083	exonic	LOC_Os06g09679/LOC_Os06g09688	Yes
Ath_circ_FC3435	exon	AT5G20830	osa_circ_020224	exonic	LOC_Os03g28330	Yes
Ath_circ_FC3436	exon	AT5G20830	osa_circ_020224	exonic	LOC_Os03g28330	Yes
Ath_circ_FC3441	exon	AT5G21090	osa_circ_004504	exonic	LOC_Os01g59440	Yes
Ath_circ_FC3444	exon	AT5G21222	osa_circ_010426	exonic	LOC_Os12g03810	Yes
Ath_circ_FC3445	exon	AT5G21222	osa_circ_010426	exonic	LOC_Os12g03810	Yes
Ath_circ_FC3448	exon	AT5G22010	osa_circ_009646	exonic	LOC_Os11g36390	Yes
Ath_circ_FC3450	exon	AT5G22030	osa_circ_006254	exonic	LOC_Os10g07270	Yes
Ath_circ_FC3454	exon	AT5G22060	osa_circ_020808	exonic	LOC_Os03g44620	Yes
Ath_circ_FC3457	exon	AT5G22330	osa_circ_004761	exonic	LOC_Os01g62040	Yes
Ath_circ_FC3463	exon	AT5G22650	osa_circ_029264	exonic	LOC_Os05g51830	Yes
Ath_circ_FC3465	exon	AT5G22780	osa_circ_017549	exonic	LOC_Os03g02150	Yes
Ath_circ_FC3466	exon	AT5G22800	osa_circ_030364	exonic	LOC_Os06g13660	Yes
Ath_circ_FC3471	exon	AT5G23210	osa_circ_001614	exonic	LOC_Os01g22980	Yes
Ath_circ_FC3472	exon	AT5G23210	osa_circ_001614	exonic	LOC_Os01g22980	Yes
Ath_circ_FC3476	exon	AT5G23490	osa_circ_000083	exonic	LOC_Os01g01800	Yes
Ath_circ_FC3478	exon	AT5G23580	osa_circ_010629	exonic	LOC_Os12g07230	Yes
Ath_circ_FC3479	exon	AT5G23580	osa_circ_010629	exonic	LOC_Os12g07230	Yes
Ath_circ_FC3481	exon	AT5G23630	osa_circ_027828	exonic	LOC_Os05g33390	Yes
Ath_circ_FC3485	exon	AT5G23880	osa_circ_040261	exonic	LOC_Os09g39590	Yes
Ath_circ_FC3492	exon	AT5G24430	osa_circ_007640	exonic	LOC_Os10g36710	Yes
Ath_circ_FC3496	exon	AT5G24530	osa_circ_007827	exonic	LOC_Os10g39140	Yes
Ath_circ_FC3505	exon	AT5G24710	osa_circ_002945	exonic	LOC_Os01g46510	Yes
Ath_circ_FC3510	exon	AT5G24740	osa_circ_035645	exonic	LOC_Os08g02354	Yes
Ath_circ_FC3514	exon	AT5G25060	osa_circ_013477	exonic	LOC_Os02g08360	Yes
Ath_circ_FC3515	exon	AT5G25100	osa_circ_031201	exonic	LOC_Os06g37160	Yes
Ath_circ_FC3518	exon	AT5G25220	osa_circ_036609	exonic	LOC_Os08g19650	Yes
Ath_circ_FC3528	exon	AT5G25770	osa_circ_029779	exonic	LOC_Os06g06770	Yes
Ath_circ_FC3529	exon	AT5G26340	osa_circ_018549	exonic	LOC_Os03g11900	Yes
Ath_circ_FC3534	exon	AT5G26751	osa_circ_026454	exonic	LOC_Os05g04340	Yes
Ath_circ_FC3535	exon	AT5G26780	osa_circ_021794	exonic	LOC_Os03g52840	Yes
Ath_circ_FC3548	exon	AT5G27950	osa_circ_009891	exonic	LOC_Os11g42800	Yes
Ath_circ_FC3549	exon	AT5G27950	osa_circ_009891	exonic	LOC_Os11g42800	Yes
Ath_circ_FC3550	exon	AT5G27970	osa_circ_004125	exonic	LOC_Os01g56590	Yes
Ath_circ_FC3552	exon	AT5G28050	osa_circ_033281	exonic	LOC_Os07g14150	Yes
Ath_circ_FC3553	exon	AT5G32450	osa_circ_021890	exonic	LOC_Os03g53770	Yes
Ath_circ_FC3557	exon	AT5G34850	osa_circ_031676	exonic	LOC_Os06g43640	Yes
Ath_circ_FC3558	exon	AT5G34850	osa_circ_031677	exonic	LOC_Os06g43640	Yes
Ath_circ_FC3559	exon	AT5G34850	osa_circ_031677	exonic	LOC_Os06g43640	Yes
Ath_circ_FC3560	exon	AT5G34850	osa_circ_031677	exonic	LOC_Os06g43640	Yes
Ath_circ_FC3563	exon	AT5G35160	osa_circ_016960	exonic	LOC_Os02g55440	Yes
Ath_circ_FC3566	exon	AT5G35330	osa_circ_039689	exonic	LOC_Os09g32090	Yes
Ath_circ_FC3571	exon	AT5G35570	osa_circ_039365	exonic	LOC_Os09g27080	Yes
Ath_circ_FC3573	exon	AT5G35630	osa_circ_025773	exonic	LOC_Os04g56400	Yes
Ath_circ_FC3576	exon	AT5G35730	osa_circ_012160	exonic	LOC_Os12g40340	Yes
Ath_circ_FC3579	exon	AT5G35910	osa_circ_018023	exonic	LOC_Os03g06190	Yes
Ath_circ_FC3581	exon	AT5G35970	osa_circ_038486	exonic	LOC_Os09g04440	Yes
Ath_circ_FC3582	exon	AT5G35980	osa_circ_016127	exonic	LOC_Os02g47410	Yes
Ath_circ_FC3586	exon	AT5G36880	osa_circ_014864	exonic	LOC_Os02g32490	Yes
Ath_circ_FC3588	exon	AT5G37020	osa_circ_013318	exonic	LOC_Os02g06910	Yes
Ath_circ_FC3596	exon	AT5G37780	osa_circ_001261	exonic	LOC_Os01g16240	Yes
Ath_circ_FC3599	exon	AT5G37850	osa_circ_012200	exonic	LOC_Os12g40830	Yes
Ath_circ_FC3600	exon	AT5G37850	osa_circ_012200	exonic	LOC_Os12g40830	Yes
Ath_circ_FC3601	exon	AT5G37850	osa_circ_012200	exonic	LOC_Os12g40830	Yes
Ath_circ_FC3603	Intergenic	n/a	osa_circ_011091	exonic	LOC_Os12g17600	Yes
Ath_circ_FC3604	Intergenic	n/a	osa_circ_011091	exonic	LOC_Os12g17600	Yes
Ath_circ_FC3605	Intergenic	n/a	osa_circ_011091	exonic	LOC_Os12g17600	Yes
Ath_circ_FC3606	exon	AT5G38420	osa_circ_011091	exonic	LOC_Os12g17600	Yes
Ath_circ_FC3607	exon	AT5G38420	osa_circ_011091	exonic	LOC_Os12g17600	Yes
Ath_circ_FC3608	exon	AT5G38470	osa_circ_039128	exonic	LOC_Os09g24200	Yes
Ath_circ_FC3611	exon	AT5G38880	osa_circ_039068	exonic	LOC_Os09g21780	Yes
Ath_circ_FC3612	exon	AT5G38880	osa_circ_039068	exonic	LOC_Os09g21780	Yes
Ath_circ_FC3616	exon	AT5G39740	osa_circ_005221	exonic	LOC_Os01g67134	Yes
Ath_circ_FC3620	exon	AT5G40640	osa_circ_024012	exonic	LOC_Os04g37670	Yes
Ath_circ_FC3623	exon	AT5G40810	osa_circ_027318	exonic	LOC_Os05g23620	Yes
Ath_circ_FC3624	exon	AT5G41260	osa_circ_026025	exonic	LOC_Os04g58750	Yes
Ath_circ_FC3625	exon	AT5G41350	osa_circ_009112	exonic	LOC_Os11g18947	Yes
Ath_circ_FC3628	exon	AT5G42020	osa_circ_012743	exonic	LOC_Os02g02410	Yes
Ath_circ_FC3629	exon	AT5G42020	osa_circ_012743	exonic	LOC_Os02g02410	Yes
Ath_circ_FC3631	exon	AT5G42080	osa_circ_021273	exonic	LOC_Os03g50520	Yes
Ath_circ_FC3632	exon	AT5G42080	osa_circ_028847	exonic	LOC_Os05g48240	Yes
Ath_circ_FC3633	exon	AT5G42080	osa_circ_028847	exonic	LOC_Os05g48240	Yes
Ath_circ_FC3635	exon	AT5G42150	osa_circ_023173	exonic	LOC_Os04g17050	Yes
Ath_circ_FC3642	exon	AT5G42320	osa_circ_012791	exonic	LOC_Os02g02710	Yes
Ath_circ_FC3643	exon	AT5G42320	osa_circ_012791	exonic	LOC_Os02g02710	Yes
Ath_circ_FC3645	exon	AT5G42390	osa_circ_031439	exonic	LOC_Os06g41990	Yes
Ath_circ_FC3646	exon	AT5G42390	osa_circ_031437	exonic	LOC_Os06g41990	Yes
Ath_circ_FC3648	exon	AT5G42620	osa_circ_021647	exonic	LOC_Os03g52150	Yes
Ath_circ_FC3652	exon	AT5G43100	osa_circ_034617	exonic	LOC_Os07g40260	Yes
Ath_circ_FC3657	exon	AT5G43810	osa_circ_024912	exonic	LOC_Os04g47870	Yes
Ath_circ_FC3661	exon	AT5G43900	osa_circ_030904	exonic	LOC_Os06g29350	Yes
Ath_circ_FC3662	exon	AT5G43930	osa_circ_038767	exonic	LOC_Os09g12550	Yes
Ath_circ_FC3664	exon	AT5G43930	osa_circ_014313	exonic	LOC_Os02g18820	Yes
Ath_circ_FC3681	exon	AT5G46110	osa_circ_001012	exonic	LOC_Os01g13760/LOC_Os01g13770	Yes
Ath_circ_FC3682	exon	AT5G46180	osa_circ_020764	exonic	LOC_Os03g44150	Yes
Ath_circ_FC3685	exon	AT5G46340	osa_circ_029098	exonic	LOC_Os05g50510	Yes
Ath_circ_FC3690	exon	AT5G47010	osa_circ_033904	exonic	LOC_Os07g31340	Yes
Ath_circ_FC3694	exon	AT5G47040	osa_circ_040000	exonic	LOC_Os09g36300	Yes
Ath_circ_FC3695	exon	AT5G47040	osa_circ_040000	exonic	LOC_Os09g36300	Yes
Ath_circ_FC3696	exon	AT5G47070	osa_circ_006922	exonic	LOC_Os10g30590/LOC_Os10g30600	Yes
Ath_circ_FC3697	exon	AT5G47200	osa_circ_002189	exonic	LOC_Os01g37800	Yes
Ath_circ_FC3698	exon	AT5G47210	osa_circ_029155	exonic	LOC_Os05g51180	Yes
Ath_circ_FC3700	exon	AT5G47430	osa_circ_006866	exonic	LOC_Os10g29560	Yes
Ath_circ_FC3701	Intergenic	n/a	osa_circ_012654	exonic	LOC_Os02g01490	Yes
Ath_circ_FC3703	exon	AT5G47500	osa_circ_024801	exonic	LOC_Os04g46740	Yes
Ath_circ_FC3708	exon	AT5G47720	osa_circ_000114	exonic	LOC_Os01g02020	Yes
Ath_circ_FC3711	exon	AT5G47780	osa_circ_039960	exonic	LOC_Os09g36180/LOC_Os09g36190	Yes
Ath_circ_FC3712	exon	AT5G47820	osa_circ_038418	exonic	LOC_Os09g02650	Yes
Ath_circ_FC3714	exon	AT5G47910	osa_circ_009506	exonic	LOC_Os11g33120	Yes
Ath_circ_FC3716	exon	AT5G48250	osa_circ_030592	exonic	LOC_Os06g19444	Yes
Ath_circ_FC3724	exon	AT5G48880	osa_circ_006993	exonic	LOC_Os10g31950	Yes
Ath_circ_FC3726	exon	AT5G49030	osa_circ_016766	exonic	LOC_Os02g53770	Yes
Ath_circ_FC3728	exon	AT5G49190	osa_circ_020221	exonic	LOC_Os03g28330	Yes
Ath_circ_FC3729	exon	AT5G49360	osa_circ_010008	exonic	LOC_Os11g44950	Yes
Ath_circ_FC3732	exon	AT5G49460	osa_circ_001458	exonic	LOC_Os01g19450	Yes
Ath_circ_FC3734	exon	AT5G49720	osa_circ_021700	exonic	LOC_Os03g52630	Yes
Ath_circ_FC3735	exon	AT5G49820	osa_circ_005153	exonic	LOC_Os01g66350	Yes
Ath_circ_FC3736	exon	AT5G49830	osa_circ_033126	exonic	LOC_Os07g10110	Yes
Ath_circ_FC3745	exon	AT5G50920	osa_circ_023667	exonic	LOC_Os04g32560	Yes
Ath_circ_FC3749	exon	AT5G51180	osa_circ_035826	exonic	LOC_Os08g04810	Yes
Ath_circ_FC3751	exon	AT5G51280	osa_circ_013158	exonic	LOC_Os02g05660	Yes
Ath_circ_FC3757	exon	AT5G51430	osa_circ_031928	exonic	LOC_Os06g45830	Yes
Ath_circ_FC3761	exon	AT5G51710	osa_circ_031155	exonic	LOC_Os06g36590	Yes
Ath_circ_FC3763	exon	AT5G52100	osa_circ_017609	intergenic	NA	Yes
Ath_circ_FC3768	exon	AT5G52640	osa_circ_039613	exonic	LOC_Os09g30438/LOC_Os09g30418	Yes
Ath_circ_FC3777	exon	AT5G53140	osa_circ_031053	exonic	LOC_Os06g33530/LOC_Os06g33549	Yes
Ath_circ_FC3778	exon	AT5G53170	osa_circ_002696	exonic	LOC_Os01g43150	Yes
Ath_circ_FC3780	exon	AT5G53170	osa_circ_002700	exonic	LOC_Os01g43150	Yes
Ath_circ_FC3781	exon	AT5G53170	osa_circ_002702	exonic	LOC_Os01g43150	Yes
Ath_circ_FC3784	exon	AT5G53450	osa_circ_003051	exonic	LOC_Os01g46720	Yes
Ath_circ_FC3786	exon	AT5G53460	osa_circ_028834	exonic	LOC_Os05g48200	Yes
Ath_circ_FC3787	exon	AT5G53850	osa_circ_009376	exonic	LOC_Os11g29370	Yes
Ath_circ_FC3791	exon	AT5G54190	osa_circ_007304	exonic	LOC_Os10g35370	Yes
Ath_circ_FC3802	exon	AT5G54770	osa_circ_034116	exonic	LOC_Os07g34570	Yes
Ath_circ_FC3803	exon	AT5G54770	osa_circ_034130	exonic	LOC_Os07g34570	Yes
Ath_circ_FC3812	exon	AT5G55060	osa_circ_034024	exonic	LOC_Os07g32670	Yes
Ath_circ_FC3816	exon	AT5G55550	osa_circ_034561	exonic	LOC_Os07g39560	Yes
Ath_circ_FC3818	exon	AT5G55760	osa_circ_023251	exonic	LOC_Os04g20270	Yes
Ath_circ_FC3824	exon	AT5G56030	osa_circ_037528	exonic	LOC_Os08g39140	Yes
Ath_circ_FC3826	exon	AT5G56190	osa_circ_029844	exonic	LOC_Os06g07540	Yes
Ath_circ_FC3830	exon	AT5G56720	osa_circ_007137	exonic	LOC_Os10g33800	Yes
Ath_circ_FC3831	exon	AT5G56750	osa_circ_013951	exonic	LOC_Os02g13150	Yes
Ath_circ_FC3833	exon	AT5G57015	osa_circ_003564	exonic	LOC_Os01g51200	Yes
Ath_circ_FC3834	exon	AT5G57030	osa_circ_002331	exonic	LOC_Os01g39960	Yes
Ath_circ_FC3837	exon	AT5G57160	osa_circ_025126	exonic	LOC_Os04g51700	Yes
Ath_circ_FC3838	exon	AT5G57350	osa_circ_025748	exonic	LOC_Os04g56160	Yes
Ath_circ_FC3839	exon	AT5G57350	osa_circ_025747	exonic	LOC_Os04g56160	Yes
Ath_circ_FC3843	exon	AT5G57870	osa_circ_024438	exonic	LOC_Os04g42140	Yes
Ath_circ_FC3844	exon	AT5G57870	osa_circ_024436	exonic	LOC_Os04g42140	Yes
Ath_circ_FC3845	exon	AT5G57940	osa_circ_031058	exonic	LOC_Os06g33570/LOC_Os06g33600	Yes
Ath_circ_FC3848	Intergenic	n/a	osa_circ_031432	intronic	LOC_Os06g41930	Yes
Ath_circ_FC3850	exon	AT5G58140	osa_circ_023359	exonic	LOC_Os04g23890	Yes
Ath_circ_FC3851	exon	AT5G58290	osa_circ_013739	exonic	LOC_Os02g11050	Yes
Ath_circ_FC3853	exon	AT5G58500	osa_circ_031965	exonic	LOC_Os06g46030	Yes
Ath_circ_FC3858	exon	AT5G59160	osa_circ_019059	exonic	LOC_Os03g16110	Yes
Ath_circ_FC3860	exon	AT5G59290	osa_circ_019153	exonic	LOC_Os03g16980	Yes
Ath_circ_FC3863	exon	AT5G59420	osa_circ_019108	exonic	LOC_Os03g16690	Yes
Ath_circ_FC3865	exon	AT5G59710	osa_circ_016815	exonic	LOC_Os02g54120	Yes
Ath_circ_FC3871	exon	AT5G60390	osa_circ_018181	exonic	LOC_Os03g08010/LOC_Os03g08050	Yes
Ath_circ_FC3873	exon	AT5G60410	osa_circ_021318	exonic	LOC_Os03g50980	Yes
Ath_circ_FC3874	exon	AT5G60410	osa_circ_021315	exonic	LOC_Os03g50980	Yes
Ath_circ_FC3875	exon	AT5G60410	osa_circ_021315	exonic	LOC_Os03g50980	Yes
Ath_circ_FC3876	exon	AT5G60410	osa_circ_021315	exonic	LOC_Os03g50980	Yes
Ath_circ_FC3882	exon	AT5G60600	osa_circ_015381	exonic	LOC_Os02g39160	Yes
Ath_circ_FC3883	exon	AT5G60690	osa_circ_012281	exonic	LOC_Os12g41860	Yes
Ath_circ_FC3887	Intergenic	n/a	osa_circ_034673	exonic	LOC_Os07g41090	Yes
Ath_circ_FC3891	exon	AT5G61410	osa_circ_018113	exonic	LOC_Os03g07300	Yes
Ath_circ_FC3892	exon	AT5G61410	osa_circ_018113	exonic	LOC_Os03g07300	Yes
Ath_circ_FC3893	exon	AT5G61410	osa_circ_018113	exonic	LOC_Os03g07300	Yes
Ath_circ_FC3897	exon	AT5G61780	osa_circ_014841	exonic	LOC_Os02g32350	Yes
Ath_circ_FC3899	exon	AT5G61900	osa_circ_027672	exonic	LOC_Os05g30970	Yes
Ath_circ_FC3904	exon	AT5G62000	osa_circ_023934	exonic	LOC_Os04g36054	Yes
Ath_circ_FC3909	exon	AT5G62190	osa_circ_039884	exonic	LOC_Os09g34910	Yes
Ath_circ_FC3912	Intergenic	n/a	osa_circ_004482	exonic	LOC_Os01g59150	Yes
Ath_circ_FC3913	exon	AT5G62790	osa_circ_000069	exonic	LOC_Os01g01710	Yes
Ath_circ_FC3914	exon	AT5G62890	osa_circ_016510	exonic	LOC_Os02g50820	Yes
Ath_circ_FC3915	exon	AT5G62890	osa_circ_016510	exonic	LOC_Os02g50820	Yes
Ath_circ_FC3919	exon	AT5G63180	osa_circ_022974	exonic	LOC_Os04g05050	Yes
Ath_circ_FC3923	exon	AT5G63420	osa_circ_014934	exonic	LOC_Os02g33610	Yes
Ath_circ_FC3933	exon	AT5G63960	osa_circ_008735	exonic	LOC_Os11g08330	Yes
Ath_circ_FC3934	exon	AT5G63990	osa_circ_010707	exonic	LOC_Os12g08270/LOC_Os12g08280	Yes
Ath_circ_FC3935	exon	AT5G64030	osa_circ_005096	exonic	LOC_Os01g66110	Yes
Ath_circ_FC3936	exon	AT5G64070	osa_circ_008815	exonic	LOC_Os11g10420	Yes
Ath_circ_FC3940	exon	AT5G64300	osa_circ_015103	exonic	LOC_Os02g36340	Yes
Ath_circ_FC3944	exon	AT5G64460	osa_circ_022859	exonic	LOC_Os04g01230	Yes
Ath_circ_FC3946	exon	AT5G64552	osa_circ_002726	exonic	LOC_Os01g43370/LOC_Os01g43372	Yes
Ath_circ_FC3949	exon	AT5G64740	osa_circ_022622	exonic	LOC_Os03g62090	Yes
Ath_circ_FC3950	exon	AT5G64740	osa_circ_026842	exonic	LOC_Os05g08370	Yes
Ath_circ_FC3953	exon	AT5G64940	osa_circ_015137	exonic	LOC_Os02g36570	Yes
Ath_circ_FC3954	exon	AT5G64940	osa_circ_015140	exonic	LOC_Os02g36570	Yes
Ath_circ_FC3959	exon	AT5G65310	osa_circ_016395	exonic	LOC_Os02g49700	Yes
Ath_circ_FC3963	exon	AT5G65700	osa_circ_022676	exonic	LOC_Os03g62700	Yes
Ath_circ_FC3967	exon	AT5G65930	osa_circ_025843	exonic	LOC_Os04g57140	Yes
Ath_circ_FC3971	Intergenic	n/a	osa_circ_033739	exonic	LOC_Os07g28940	Yes
Ath_circ_FC3972	exon	AT5G66060	osa_circ_006806	exonic	LOC_Os10g27340	Yes
Ath_circ_FC3975	exon	AT5G66310	osa_circ_024695	exonic	LOC_Os04g45580	Yes
Ath_circ_FC3977	exon	AT5G66570	osa_circ_001831	exonic	LOC_Os01g31690	Yes
Ath_circ_FC3978	exon	AT5G66570	osa_circ_001835	exonic	LOC_Os01g31690	Yes
Ath_circ_FC3979	Intergenic	n/a	osa_circ_008749	exonic	LOC_Os11g08569	Yes
Ath_circ_FC3980	exon	AT5G66640	osa_circ_032643	exonic	LOC_Os07g02350	Yes
Ath_circ_FC3981	exon	AT5G66680	osa_circ_033202	exonic	LOC_Os07g10830	Yes
Ath_circ_FC3982	exon	AT5G66680	osa_circ_033199	exonic	LOC_Os07g10830	Yes
Ath_circ_FC3984	exon	AT5G66760	osa_circ_032708	exonic	LOC_Os07g04240	Yes
Ath_circ_FC3985	exon	AT5G66760	osa_circ_032708	exonic	LOC_Os07g04240	Yes
Ath_circ_FC3986	exon	AT5G66850	osa_circ_022006	exonic	LOC_Os03g55560	Yes
Ath_circ_FC3987	exon	AT5G67030	osa_circ_024008	exonic	LOC_Os04g37619	Yes
Ath_circ_FC3988	exon	AT5G67030	osa_circ_024008	exonic	LOC_Os04g37619	Yes
Ath_circ_FC3998	Intergenic	n/a	osa_circ_006194	intergenic	NA	Yes
Ath_circ_FC3999	Intergenic	n/a	osa_circ_003380	intergenic	NA	Yes
Ath_circ_FC4000	Intergenic	n/a	osa_circ_035646	intronic	LOC_Os08g02354	Yes
Ath_circ_FC4001	Intergenic	n/a	osa_circ_004324	intergenic	NA	Yes
Ath_circ_FC4002	Intergenic	n/a	osa_circ_004324	intergenic	NA	Yes
Ath_circ_FC4003	Intergenic	n/a	osa_circ_004324	intergenic	NA	Yes
Ath_circ_FC4004	Intergenic	n/a	osa_circ_004324	intergenic	NA	Yes
Ath_circ_FC4005	Intergenic	n/a	osa_circ_004324	intergenic	NA	Yes
Ath_circ_FC4019	Intergenic	n/a	osa_circ_025620	intergenic	NA	Yes
Ath_circ_FC4020	Intergenic	n/a	osa_circ_025620	intergenic	NA	Yes
Ath_circ_FC4021	Intergenic	n/a	osa_circ_025620	intergenic	NA	Yes
Ath_circ_FC4022	Intergenic	n/a	osa_circ_025620	intergenic	NA	Yes
Ath_circ_FC4023	exon	ATMG01360	osa_circ_011609	exonic	LOC_Os12g33946	Yes
Ath_circ_FC4024	Intergenic	n/a	osa_circ_011609	exonic	LOC_Os12g33946	Yes
Ath_circ_FC4025	exon	ATMG01360	osa_circ_011609	exonic	LOC_Os12g33946	Yes
Ath_circ_FC4026	Intergenic	n/a	osa_circ_038623	intergenic	NA	Yes
Ath_circ_FC4027	Intergenic	n/a	osa_circ_038623	intergenic	NA	Yes
Ath_circ_FC4028	Intergenic	n/a	osa_circ_038623	intergenic	NA	Yes
Ath_circ_FC4029	exon	ATMG01360	osa_circ_038623	intergenic	NA	Yes
Ath_circ_FC4030	Intergenic	n/a	osa_circ_038623	intergenic	NA	Yes
Ath_circ_FC4031	Intergenic	n/a	osa_circ_038623	intergenic	NA	Yes
Ath_circ_FC4032	Intergenic	n/a	osa_circ_038623	intergenic	NA	Yes
Ath_circ_FC4043	Intergenic	n/a	osa_circ_006520	exonic	LOC_Os10g21192	Yes
Ath_circ_FC4044	Intergenic	n/a	osa_circ_006520	exonic	LOC_Os10g21192	Yes
Ath_circ_FC4045	Intergenic	n/a	osa_circ_006520	exonic	LOC_Os10g21192	Yes
Ath_circ_FC4046	Intergenic	n/a	osa_circ_006520	exonic	LOC_Os10g21192	Yes
Ath_circ_FC4047	Intergenic	n/a	osa_circ_006520	exonic	LOC_Os10g21192	Yes
Ath_circ_FC4048	Intergenic	n/a	osa_circ_006520	exonic	LOC_Os10g21192	Yes
Ath_circ_FC4049	Intergenic	n/a	osa_circ_006520	exonic	LOC_Os10g21192	Yes
Ath_circ_FC4050	Intergenic	n/a	osa_circ_006520	exonic	LOC_Os10g21192	Yes
Ath_circ_FC4051	Intergenic	n/a	osa_circ_006520	exonic	LOC_Os10g21192	Yes
Ath_circ_FC4052	Intergenic	n/a	osa_circ_006520	exonic	LOC_Os10g21192	Yes
Ath_circ_FC4053	Intergenic	n/a	osa_circ_006520	exonic	LOC_Os10g21192	Yes
Ath_circ_FC4054	Intergenic	n/a	osa_circ_006520	exonic	LOC_Os10g21192	Yes
Ath_circ_FC4055	Intergenic	n/a	osa_circ_006520	exonic	LOC_Os10g21192	Yes
Ath_circ_FC4056	Intergenic	n/a	osa_circ_006520	exonic	LOC_Os10g21192	Yes
Ath_circ_FC4057	Intergenic	n/a	osa_circ_006520	exonic	LOC_Os10g21192	Yes
Ath_circ_FC4058	Intergenic	n/a	osa_circ_006520	exonic	LOC_Os10g21192	Yes
Ath_circ_FC4059	Intergenic	n/a	osa_circ_006520	exonic	LOC_Os10g21192	Yes
Ath_circ_FC4060	Intergenic	n/a	osa_circ_006520	exonic	LOC_Os10g21192	Yes
Ath_circ_FC4061	Intergenic	n/a	osa_circ_006520	exonic	LOC_Os10g21192	Yes
Ath_circ_FC4062	Intergenic	n/a	osa_circ_006520	exonic	LOC_Os10g21192	Yes
Ath_circ_FC4063	Intergenic	n/a	osa_circ_006520	exonic	LOC_Os10g21192	Yes
Ath_circ_FC4064	Intergenic	n/a	osa_circ_006520	exonic	LOC_Os10g21192	Yes
Ath_circ_FC4065	Intergenic	n/a	osa_circ_006520	exonic	LOC_Os10g21192	Yes
Ath_circ_FC4066	Intergenic	n/a	osa_circ_006520	exonic	LOC_Os10g21192	Yes
Ath_circ_FC4067	Intergenic	n/a	osa_circ_006520	exonic	LOC_Os10g21192	Yes
Ath_circ_FC4068	Intergenic	n/a	osa_circ_006520	exonic	LOC_Os10g21192	Yes
Ath_circ_FC4069	Intergenic	n/a	osa_circ_006520	exonic	LOC_Os10g21192	Yes
Ath_circ_FC4070	Intergenic	n/a	osa_circ_006520	exonic	LOC_Os10g21192	Yes
Ath_circ_FC4071	Intergenic	n/a	osa_circ_006520	exonic	LOC_Os10g21192	Yes
Ath_circ_FC4072	Intergenic	n/a	osa_circ_006520	exonic	LOC_Os10g21192	Yes
Ath_circ_FC4073	Intergenic	n/a	osa_circ_006520	exonic	LOC_Os10g21192	Yes
Ath_circ_FC4074	Intergenic	n/a	osa_circ_006520	exonic	LOC_Os10g21192	Yes
Ath_circ_FC4075	Intergenic	n/a	osa_circ_006520	exonic	LOC_Os10g21192	Yes
Ath_circ_FC4076	Intergenic	n/a	osa_circ_006520	exonic	LOC_Os10g21192	Yes
Ath_circ_FC4077	Intergenic	n/a	osa_circ_006520	exonic	LOC_Os10g21192	Yes
Ath_circ_FC4078	Intergenic	n/a	osa_circ_006520	exonic	LOC_Os10g21192	Yes
Ath_circ_FC4079	Intergenic	n/a	osa_circ_006520	exonic	LOC_Os10g21192	Yes
Ath_circ_FC4080	Intergenic	n/a	osa_circ_006520	exonic	LOC_Os10g21192	Yes
Ath_circ_FC4081	Intergenic	n/a	osa_circ_006520	exonic	LOC_Os10g21192	Yes
Ath_circ_FC4082	Intergenic	n/a	osa_circ_006520	exonic	LOC_Os10g21192	Yes
Ath_circ_FC4083	Intergenic	n/a	osa_circ_006520	exonic	LOC_Os10g21192	Yes
Ath_circ_FC4084	Intergenic	n/a	osa_circ_006520	exonic	LOC_Os10g21192	Yes
Ath_circ_FC4085	Intergenic	n/a	osa_circ_006520	exonic	LOC_Os10g21192	Yes
Ath_circ_FC4086	Intergenic	n/a	osa_circ_006520	exonic	LOC_Os10g21192	Yes
Ath_circ_FC4087	Intergenic	n/a	osa_circ_006520	exonic	LOC_Os10g21192	Yes
Ath_circ_FC4088	Intergenic	n/a	osa_circ_006520	exonic	LOC_Os10g21192	Yes
Ath_circ_FC4089	Intergenic	n/a	osa_circ_006520	exonic	LOC_Os10g21192	Yes
Ath_circ_FC4090	Intergenic	n/a	osa_circ_006520	exonic	LOC_Os10g21192	Yes
Ath_circ_FC4091	Intergenic	n/a	osa_circ_006520	exonic	LOC_Os10g21192	Yes
Ath_circ_FC4092	Intergenic	n/a	osa_circ_006520	exonic	LOC_Os10g21192	Yes
Ath_circ_FC4093	Intergenic	n/a	osa_circ_006520	exonic	LOC_Os10g21192	Yes
Ath_circ_FC4094	Intergenic	n/a	osa_circ_006520	exonic	LOC_Os10g21192	Yes
Ath_circ_FC4095	Intergenic	n/a	osa_circ_006520	exonic	LOC_Os10g21192	Yes
Ath_circ_FC4096	Intergenic	n/a	osa_circ_006520	exonic	LOC_Os10g21192	Yes
Ath_circ_FC4097	Intergenic	n/a	osa_circ_006520	exonic	LOC_Os10g21192	Yes
Ath_circ_FC4098	Intergenic	n/a	osa_circ_006520	exonic	LOC_Os10g21192	Yes
Ath_circ_FC4099	Intergenic	n/a	osa_circ_006520	exonic	LOC_Os10g21192	Yes
Ath_circ_FC4100	Intergenic	n/a	osa_circ_006520	exonic	LOC_Os10g21192	Yes
Ath_circ_FC4101	Intergenic	n/a	osa_circ_006520	exonic	LOC_Os10g21192	Yes
Ath_circ_FC4102	Intergenic	n/a	osa_circ_006520	exonic	LOC_Os10g21192	Yes
Ath_circ_FC4103	Intergenic	n/a	osa_circ_006520	exonic	LOC_Os10g21192	Yes
Ath_circ_FC4104	Intergenic	n/a	osa_circ_006520	exonic	LOC_Os10g21192	Yes
Ath_circ_FC4105	Intergenic	n/a	osa_circ_006520	exonic	LOC_Os10g21192	Yes
Ath_circ_FC4106	Intergenic	n/a	osa_circ_006520	exonic	LOC_Os10g21192	Yes
Ath_circ_FC4107	Intergenic	n/a	osa_circ_006520	exonic	LOC_Os10g21192	Yes
Ath_circ_FC4108	Intergenic	n/a	osa_circ_006520	exonic	LOC_Os10g21192	Yes
Ath_circ_FC4109	Intergenic	n/a	osa_circ_006520	exonic	LOC_Os10g21192	Yes
Ath_circ_FC4110	Intergenic	n/a	osa_circ_006520	exonic	LOC_Os10g21192	Yes
Ath_circ_FC4111	Intergenic	n/a	osa_circ_006520	exonic	LOC_Os10g21192	Yes
Ath_circ_FC4112	Intergenic	n/a	osa_circ_006520	exonic	LOC_Os10g21192	Yes
Ath_circ_FC4113	Intergenic	n/a	osa_circ_006520	exonic	LOC_Os10g21192	Yes
Ath_circ_FC4114	Intergenic	n/a	osa_circ_006520	exonic	LOC_Os10g21192	Yes
Ath_circ_FC4115	Intergenic	n/a	osa_circ_006520	exonic	LOC_Os10g21192	Yes
Ath_circ_FC4116	Intergenic	n/a	osa_circ_006520	exonic	LOC_Os10g21192	Yes
Ath_circ_FC4117	Intergenic	n/a	osa_circ_006520	exonic	LOC_Os10g21192	Yes
Ath_circ_FC4118	Intergenic	n/a	osa_circ_006520	exonic	LOC_Os10g21192	Yes
Ath_circ_FC4119	Intergenic	n/a	osa_circ_006520	exonic	LOC_Os10g21192	Yes
Ath_circ_FC4120	Intergenic	n/a	osa_circ_006520	exonic	LOC_Os10g21192	Yes
Ath_circ_FC4121	Intergenic	n/a	osa_circ_006520	exonic	LOC_Os10g21192	Yes
Ath_circ_FC4122	Intergenic	n/a	osa_circ_006520	exonic	LOC_Os10g21192	Yes
Ath_circ_FC4123	Intergenic	n/a	osa_circ_006520	exonic	LOC_Os10g21192	Yes
Ath_circ_FC4124	Intergenic	n/a	osa_circ_006520	exonic	LOC_Os10g21192	Yes
Ath_circ_FC4125	Intergenic	n/a	osa_circ_006520	exonic	LOC_Os10g21192	Yes
Ath_circ_FC4126	Intergenic	n/a	osa_circ_006520	exonic	LOC_Os10g21192	Yes
Ath_circ_FC4127	Intergenic	n/a	osa_circ_006520	exonic	LOC_Os10g21192	Yes
Ath_circ_FC4128	Intergenic	n/a	osa_circ_006520	exonic	LOC_Os10g21192	Yes
Ath_circ_FC4129	Intergenic	n/a	osa_circ_006520	exonic	LOC_Os10g21192	Yes
Ath_circ_FC4130	Intergenic	n/a	osa_circ_006520	exonic	LOC_Os10g21192	Yes
Ath_circ_FC4131	Intergenic	n/a	osa_circ_006520	exonic	LOC_Os10g21192	Yes
Ath_circ_FC4132	Intergenic	n/a	osa_circ_006520	exonic	LOC_Os10g21192	Yes
Ath_circ_FC4133	Intergenic	n/a	osa_circ_006520	exonic	LOC_Os10g21192	Yes
Ath_circ_FC4134	exon	ATCG00020	osa_circ_006520	exonic	LOC_Os10g21192	Yes
Ath_circ_FC4135	exon	ATCG00020	osa_circ_006520	exonic	LOC_Os10g21192	Yes
Ath_circ_FC4136	exon	ATCG00020	osa_circ_006520	exonic	LOC_Os10g21192	Yes
Ath_circ_FC4137	exon	ATCG00020	osa_circ_006520	exonic	LOC_Os10g21192	Yes
Ath_circ_FC4138	exon	ATCG00020	osa_circ_006520	exonic	LOC_Os10g21192	Yes
Ath_circ_FC4139	exon	ATCG00020	osa_circ_006520	exonic	LOC_Os10g21192	Yes
Ath_circ_FC4140	exon	ATCG00020	osa_circ_006520	exonic	LOC_Os10g21192	Yes
Ath_circ_FC4141	Intergenic	n/a	osa_circ_006520	exonic	LOC_Os10g21192	Yes
Ath_circ_FC4142	exon	ATCG00020	osa_circ_006520	exonic	LOC_Os10g21192	Yes
Ath_circ_FC4143	exon	ATCG00020	osa_circ_006520	exonic	LOC_Os10g21192	Yes
Ath_circ_FC4144	exon	ATCG00020	osa_circ_006520	exonic	LOC_Os10g21192	Yes
Ath_circ_FC4145	exon	ATCG00020	osa_circ_006520	exonic	LOC_Os10g21192	Yes
Ath_circ_FC4146	exon	ATCG00020	osa_circ_006520	exonic	LOC_Os10g21192	Yes
Ath_circ_FC4147	exon	ATCG00020	osa_circ_006520	exonic	LOC_Os10g21192	Yes
Ath_circ_FC4148	exon	ATCG00020	osa_circ_006520	exonic	LOC_Os10g21192	Yes
Ath_circ_FC4149	exon	ATCG00020	osa_circ_006520	exonic	LOC_Os10g21192	Yes
Ath_circ_FC4150	exon	ATCG00020	osa_circ_006520	exonic	LOC_Os10g21192	Yes
Ath_circ_FC4151	exon	ATCG00020	osa_circ_006520	exonic	LOC_Os10g21192	Yes
Ath_circ_FC4152	exon	ATCG00020	osa_circ_006520	exonic	LOC_Os10g21192	Yes
Ath_circ_FC4153	exon	ATCG00020	osa_circ_006520	exonic	LOC_Os10g21192	Yes
Ath_circ_FC4154	exon	ATCG00020	osa_circ_006520	exonic	LOC_Os10g21192	Yes
Ath_circ_FC4155	Intergenic	n/a	osa_circ_006520	exonic	LOC_Os10g21192	Yes
Ath_circ_FC4156	Intergenic	n/a	osa_circ_006520	exonic	LOC_Os10g21192	Yes
Ath_circ_FC4157	Intergenic	n/a	osa_circ_006520	exonic	LOC_Os10g21192	Yes
Ath_circ_FC4158	Intergenic	n/a	osa_circ_006520	exonic	LOC_Os10g21192	Yes
Ath_circ_FC4159	Intergenic	n/a	osa_circ_006520	exonic	LOC_Os10g21192	Yes
Ath_circ_FC4160	Intergenic	n/a	osa_circ_006520	exonic	LOC_Os10g21192	Yes
Ath_circ_FC4161	Intergenic	n/a	osa_circ_006520	exonic	LOC_Os10g21192	Yes
Ath_circ_FC4162	Intergenic	n/a	osa_circ_006520	exonic	LOC_Os10g21192	Yes
Ath_circ_FC4163	Intergenic	n/a	osa_circ_006520	exonic	LOC_Os10g21192	Yes
Ath_circ_FC4164	Intergenic	n/a	osa_circ_006520	exonic	LOC_Os10g21192	Yes
Ath_circ_FC4165	exon	ATCG00020	osa_circ_006520	exonic	LOC_Os10g21192	Yes
Ath_circ_FC4166	exon	ATCG00020	osa_circ_006520	exonic	LOC_Os10g21192	Yes
Ath_circ_FC4167	Intergenic	n/a	osa_circ_006520	exonic	LOC_Os10g21192	Yes
Ath_circ_FC4168	Intergenic	n/a	osa_circ_006520	exonic	LOC_Os10g21192	Yes
Ath_circ_FC4169	Intergenic	n/a	osa_circ_006520	exonic	LOC_Os10g21192	Yes
Ath_circ_FC4170	Intergenic	n/a	osa_circ_006520	exonic	LOC_Os10g21192	Yes
Ath_circ_FC4171	exon	ATCG00020	osa_circ_006520	exonic	LOC_Os10g21192	Yes
Ath_circ_FC4172	exon	ATCG00020	osa_circ_006520	exonic	LOC_Os10g21192	Yes
Ath_circ_FC4173	exon	ATCG00020	osa_circ_006520	exonic	LOC_Os10g21192	Yes
Ath_circ_FC4174	exon	ATCG00020	osa_circ_006520	exonic	LOC_Os10g21192	Yes
Ath_circ_FC4175	exon	ATCG00020	osa_circ_006520	exonic	LOC_Os10g21192	Yes
Ath_circ_FC4176	exon	ATCG00020	osa_circ_006520	exonic	LOC_Os10g21192	Yes
Ath_circ_FC4177	exon	ATCG00020	osa_circ_006520	exonic	LOC_Os10g21192	Yes
Ath_circ_FC4178	exon	ATCG00020	osa_circ_006520	exonic	LOC_Os10g21192	Yes
Ath_circ_FC4179	exon	ATCG00020	osa_circ_006520	exonic	LOC_Os10g21192	Yes
Ath_circ_FC4180	exon	ATCG00020	osa_circ_006520	exonic	LOC_Os10g21192	Yes
Ath_circ_FC4181	exon	ATCG00020	osa_circ_006520	exonic	LOC_Os10g21192	Yes
Ath_circ_FC4182	exon	ATCG00020	osa_circ_006520	exonic	LOC_Os10g21192	Yes
Ath_circ_FC4183	exon	ATCG00020	osa_circ_006520	exonic	LOC_Os10g21192	Yes
Ath_circ_FC4184	exon	ATCG00020	osa_circ_006520	exonic	LOC_Os10g21192	Yes
Ath_circ_FC4185	Intergenic	n/a	osa_circ_006520	exonic	LOC_Os10g21192	Yes
Ath_circ_FC4186	exon	ATCG00020	osa_circ_006520	exonic	LOC_Os10g21192	Yes
Ath_circ_FC4187	exon	ATCG00020	osa_circ_006520	exonic	LOC_Os10g21192	Yes
Ath_circ_FC4188	exon	ATCG00020	osa_circ_006520	exonic	LOC_Os10g21192	Yes
Ath_circ_FC4189	exon	ATCG00020	osa_circ_006520	exonic	LOC_Os10g21192	Yes
Ath_circ_FC4190	exon	ATCG00020	osa_circ_006520	exonic	LOC_Os10g21192	Yes
Ath_circ_FC4191	exon	ATCG00020	osa_circ_006520	exonic	LOC_Os10g21192	Yes
Ath_circ_FC4192	Intergenic	n/a	osa_circ_006520	exonic	LOC_Os10g21192	Yes
Ath_circ_FC4193	exon	ATCG00020	osa_circ_006520	exonic	LOC_Os10g21192	Yes
Ath_circ_FC4194	exon	ATCG00020	osa_circ_006520	exonic	LOC_Os10g21192	Yes
Ath_circ_FC4195	exon	ATCG00020	osa_circ_006520	exonic	LOC_Os10g21192	Yes
Ath_circ_FC4196	exon	ATCG00020	osa_circ_006520	exonic	LOC_Os10g21192	Yes
Ath_circ_FC4197	exon	ATCG00020	osa_circ_006520	exonic	LOC_Os10g21192	Yes
Ath_circ_FC4198	exon	ATCG00020	osa_circ_006520	exonic	LOC_Os10g21192	Yes
Ath_circ_FC4199	exon	ATCG00020	osa_circ_006520	exonic	LOC_Os10g21192	Yes
Ath_circ_FC4200	exon	ATCG00020	osa_circ_006520	exonic	LOC_Os10g21192	Yes
Ath_circ_FC4201	exon	ATCG00020	osa_circ_006520	exonic	LOC_Os10g21192	Yes
Ath_circ_FC4202	exon	ATCG00020	osa_circ_006520	exonic	LOC_Os10g21192	Yes
Ath_circ_FC4203	exon	ATCG00020	osa_circ_006520	exonic	LOC_Os10g21192	Yes
Ath_circ_FC4204	exon	ATCG00020	osa_circ_006520	exonic	LOC_Os10g21192	Yes
Ath_circ_FC4205	exon	ATCG00020	osa_circ_006520	exonic	LOC_Os10g21192	Yes
Ath_circ_FC4206	exon	ATCG00020	osa_circ_006520	exonic	LOC_Os10g21192	Yes
Ath_circ_FC4207	exon	ATCG00020	osa_circ_006520	exonic	LOC_Os10g21192	Yes
Ath_circ_FC4208	exon	ATCG00020	osa_circ_006520	exonic	LOC_Os10g21192	Yes
Ath_circ_FC4209	exon	ATCG00020	osa_circ_006520	exonic	LOC_Os10g21192	Yes
Ath_circ_FC4210	exon	ATCG00020	osa_circ_006520	exonic	LOC_Os10g21192	Yes
Ath_circ_FC4211	exon	ATCG00020	osa_circ_006520	exonic	LOC_Os10g21192	Yes
Ath_circ_FC4212	exon	ATCG00020	osa_circ_006520	exonic	LOC_Os10g21192	Yes
Ath_circ_FC4213	exon	ATCG00020	osa_circ_006520	exonic	LOC_Os10g21192	Yes
Ath_circ_FC4214	exon	ATCG00020	osa_circ_006520	exonic	LOC_Os10g21192	Yes
Ath_circ_FC4215	Intergenic	n/a	osa_circ_006520	exonic	LOC_Os10g21192	Yes
Ath_circ_FC4216	Intergenic	n/a	osa_circ_006520	exonic	LOC_Os10g21192	Yes
Ath_circ_FC4217	Intergenic	n/a	osa_circ_006520	exonic	LOC_Os10g21192	Yes
Ath_circ_FC4218	exon	ATCG00020	osa_circ_006520	exonic	LOC_Os10g21192	Yes
Ath_circ_FC4219	exon	ATCG00020	osa_circ_006520	exonic	LOC_Os10g21192	Yes
Ath_circ_FC4220	exon	ATCG00020	osa_circ_006520	exonic	LOC_Os10g21192	Yes
Ath_circ_FC4221	exon	ATCG00020	osa_circ_006520	exonic	LOC_Os10g21192	Yes
Ath_circ_FC4222	exon	ATCG00020	osa_circ_006520	exonic	LOC_Os10g21192	Yes
Ath_circ_FC4223	exon	ATCG00020	osa_circ_006520	exonic	LOC_Os10g21192	Yes
Ath_circ_FC4224	Intergenic	n/a	osa_circ_006520	exonic	LOC_Os10g21192	Yes
Ath_circ_FC4225	Intergenic	n/a	osa_circ_006520	exonic	LOC_Os10g21192	Yes
Ath_circ_FC4226	Intergenic	n/a	osa_circ_006520	exonic	LOC_Os10g21192	Yes
Ath_circ_FC4227	exon	ATCG00020	osa_circ_006520	exonic	LOC_Os10g21192	Yes
Ath_circ_FC4228	exon	ATCG00020	osa_circ_006520	exonic	LOC_Os10g21192	Yes
Ath_circ_FC4229	exon	ATCG00020	osa_circ_006520	exonic	LOC_Os10g21192	Yes
Ath_circ_FC4230	exon	ATCG00020	osa_circ_006520	exonic	LOC_Os10g21192	Yes
Ath_circ_FC4231	exon	ATCG00020	osa_circ_006520	exonic	LOC_Os10g21192	Yes
Ath_circ_FC4232	exon	ATCG00020	osa_circ_006520	exonic	LOC_Os10g21192	Yes
Ath_circ_FC4233	exon	ATCG00020	osa_circ_006520	exonic	LOC_Os10g21192	Yes
Ath_circ_FC4234	exon	ATCG00020	osa_circ_006520	exonic	LOC_Os10g21192	Yes
Ath_circ_FC4235	Intergenic	n/a	osa_circ_006520	exonic	LOC_Os10g21192	Yes
Ath_circ_FC4236	Intergenic	n/a	osa_circ_006520	exonic	LOC_Os10g21192	Yes
Ath_circ_FC4237	exon	ATCG00020	osa_circ_006520	exonic	LOC_Os10g21192	Yes
Ath_circ_FC4238	exon	ATCG00020	osa_circ_006520	exonic	LOC_Os10g21192	Yes
Ath_circ_FC4239	exon	ATCG00020	osa_circ_006520	exonic	LOC_Os10g21192	Yes
Ath_circ_FC4240	exon	ATCG00020	osa_circ_006520	exonic	LOC_Os10g21192	Yes
Ath_circ_FC4241	Intergenic	n/a	osa_circ_006520	exonic	LOC_Os10g21192	Yes
Ath_circ_FC4242	Intergenic	n/a	osa_circ_006520	exonic	LOC_Os10g21192	Yes
Ath_circ_FC4243	exon	ATCG00020	osa_circ_006520	exonic	LOC_Os10g21192	Yes
Ath_circ_FC4244	exon	ATCG00020	osa_circ_006520	exonic	LOC_Os10g21192	Yes
Ath_circ_FC4245	exon	ATCG00020	osa_circ_006520	exonic	LOC_Os10g21192	Yes
Ath_circ_FC4246	exon	ATCG00020	osa_circ_006520	exonic	LOC_Os10g21192	Yes
Ath_circ_FC4247	exon	ATCG00020	osa_circ_006520	exonic	LOC_Os10g21192	Yes
Ath_circ_FC4248	exon	ATCG00020	osa_circ_006520	exonic	LOC_Os10g21192	Yes
Ath_circ_FC4249	exon	ATCG00020	osa_circ_006520	exonic	LOC_Os10g21192	Yes
Ath_circ_FC4250	exon	ATCG00020	osa_circ_006520	exonic	LOC_Os10g21192	Yes
Ath_circ_FC4251	Intergenic	n/a	osa_circ_006520	exonic	LOC_Os10g21192	Yes
Ath_circ_FC4252	Intergenic	n/a	osa_circ_006520	exonic	LOC_Os10g21192	Yes
Ath_circ_FC4253	exon	ATCG00020	osa_circ_006520	exonic	LOC_Os10g21192	Yes
Ath_circ_FC4254	exon	ATCG00020	osa_circ_006520	exonic	LOC_Os10g21192	Yes
Ath_circ_FC4255	exon	ATCG00020	osa_circ_006520	exonic	LOC_Os10g21192	Yes
Ath_circ_FC4256	exon	ATCG00020	osa_circ_006520	exonic	LOC_Os10g21192	Yes
Ath_circ_FC4257	exon	ATCG00020	osa_circ_006520	exonic	LOC_Os10g21192	Yes
Ath_circ_FC4258	exon	ATCG00020	osa_circ_006520	exonic	LOC_Os10g21192	Yes
Ath_circ_FC4259	exon	ATCG00020	osa_circ_006520	exonic	LOC_Os10g21192	Yes
Ath_circ_FC4260	Intergenic	n/a	osa_circ_006520	exonic	LOC_Os10g21192	Yes
Ath_circ_FC4261	Intergenic	n/a	osa_circ_006520	exonic	LOC_Os10g21192	Yes
Ath_circ_FC4262	exon	ATCG00020	osa_circ_006520	exonic	LOC_Os10g21192	Yes
Ath_circ_FC4263	exon	ATCG00020	osa_circ_006520	exonic	LOC_Os10g21192	Yes
Ath_circ_FC4264	exon	ATCG00020	osa_circ_006520	exonic	LOC_Os10g21192	Yes
Ath_circ_FC4265	exon	ATCG00020	osa_circ_006520	exonic	LOC_Os10g21192	Yes
Ath_circ_FC4266	exon	ATCG00020	osa_circ_006520	exonic	LOC_Os10g21192	Yes
Ath_circ_FC4267	exon	ATCG00020	osa_circ_006520	exonic	LOC_Os10g21192	Yes
Ath_circ_FC4268	exon	ATCG00020	osa_circ_006520	exonic	LOC_Os10g21192	Yes
Ath_circ_FC4269	exon	ATCG00020	osa_circ_006520	exonic	LOC_Os10g21192	Yes
Ath_circ_FC4270	exon	ATCG00020	osa_circ_006520	exonic	LOC_Os10g21192	Yes
Ath_circ_FC4271	exon	ATCG00020	osa_circ_006520	exonic	LOC_Os10g21192	Yes
Ath_circ_FC4272	exon	ATCG00020	osa_circ_006520	exonic	LOC_Os10g21192	Yes
Ath_circ_FC4273	exon	ATCG00020	osa_circ_006520	exonic	LOC_Os10g21192	Yes
Ath_circ_FC4274	exon	ATCG00020	osa_circ_006520	exonic	LOC_Os10g21192	Yes
Ath_circ_FC4275	exon	ATCG00020	osa_circ_006520	exonic	LOC_Os10g21192	Yes
Ath_circ_FC4276	Intergenic	n/a	osa_circ_006520	exonic	LOC_Os10g21192	Yes
Ath_circ_FC4277	Intergenic	n/a	osa_circ_006520	exonic	LOC_Os10g21192	Yes
Ath_circ_FC4278	Intergenic	n/a	osa_circ_006520	exonic	LOC_Os10g21192	Yes
Ath_circ_FC4279	Intergenic	n/a	osa_circ_006520	exonic	LOC_Os10g21192	Yes
Ath_circ_FC4280	exon	ATCG00020	osa_circ_006520	exonic	LOC_Os10g21192	Yes
Ath_circ_FC4281	exon	ATCG00020	osa_circ_006520	exonic	LOC_Os10g21192	Yes
Ath_circ_FC4282	Intergenic	n/a	osa_circ_006520	exonic	LOC_Os10g21192	Yes
Ath_circ_FC4283	Intergenic	n/a	osa_circ_006520	exonic	LOC_Os10g21192	Yes
Ath_circ_FC4284	exon	ATCG00020	osa_circ_006520	exonic	LOC_Os10g21192	Yes
Ath_circ_FC4285	exon	ATCG00020	osa_circ_006520	exonic	LOC_Os10g21192	Yes
Ath_circ_FC4286	exon	ATCG00020	osa_circ_006520	exonic	LOC_Os10g21192	Yes
Ath_circ_FC4287	exon	ATCG00020	osa_circ_006520	exonic	LOC_Os10g21192	Yes
Ath_circ_FC4288	exon	ATCG00020	osa_circ_006520	exonic	LOC_Os10g21192	Yes
Ath_circ_FC4289	exon	ATCG00020	osa_circ_006520	exonic	LOC_Os10g21192	Yes
Ath_circ_FC4290	exon	ATCG00020	osa_circ_006520	exonic	LOC_Os10g21192	Yes
Ath_circ_FC4291	Intergenic	n/a	osa_circ_006520	exonic	LOC_Os10g21192	Yes
Ath_circ_FC4292	Intergenic	n/a	osa_circ_006520	exonic	LOC_Os10g21192	Yes
Ath_circ_FC4293	exon	ATCG00020	osa_circ_006520	exonic	LOC_Os10g21192	Yes
Ath_circ_FC4294	exon	ATCG00020	osa_circ_006520	exonic	LOC_Os10g21192	Yes
Ath_circ_FC4295	exon	ATCG00020	osa_circ_006520	exonic	LOC_Os10g21192	Yes
Ath_circ_FC4296	exon	ATCG00020	osa_circ_006520	exonic	LOC_Os10g21192	Yes
Ath_circ_FC4297	Intergenic	n/a	osa_circ_006520	exonic	LOC_Os10g21192	Yes
Ath_circ_FC4298	Intergenic	n/a	osa_circ_006520	exonic	LOC_Os10g21192	Yes
Ath_circ_FC4299	Intergenic	n/a	osa_circ_006520	exonic	LOC_Os10g21192	Yes
Ath_circ_FC4300	exon	ATCG00020	osa_circ_006520	exonic	LOC_Os10g21192	Yes
Ath_circ_FC4301	exon	ATCG00020	osa_circ_006520	exonic	LOC_Os10g21192	Yes
Ath_circ_FC4302	Intergenic	n/a	osa_circ_006520	exonic	LOC_Os10g21192	Yes
Ath_circ_FC4303	Intergenic	n/a	osa_circ_006520	exonic	LOC_Os10g21192	Yes
Ath_circ_FC4304	exon	ATCG00020	osa_circ_011243	intronic	LOC_Os12g19580	Yes
Ath_circ_FC4305	exon	ATCG00020	osa_circ_006520	exonic	LOC_Os10g21192	Yes
Ath_circ_FC4306	Intergenic	n/a	osa_circ_006520	exonic	LOC_Os10g21192	Yes
Ath_circ_FC4307	exon	ATCG00020	osa_circ_006520	exonic	LOC_Os10g21192	Yes
Ath_circ_FC4308	exon	ATCG00020	osa_circ_006520	exonic	LOC_Os10g21192	Yes
Ath_circ_FC4309	exon	ATCG00020	osa_circ_006520	exonic	LOC_Os10g21192	Yes
Ath_circ_FC4310	Intergenic	n/a	osa_circ_006520	exonic	LOC_Os10g21192	Yes
Ath_circ_FC4311	exon	ATCG00020	osa_circ_011243	intronic	LOC_Os12g19580	Yes
Ath_circ_FC4312	exon	ATCG00020	osa_circ_006520	exonic	LOC_Os10g21192	Yes
Ath_circ_FC4313	exon	ATCG00020	osa_circ_006520	exonic	LOC_Os10g21192	Yes
Ath_circ_FC4314	exon	ATCG00020	osa_circ_006520	exonic	LOC_Os10g21192	Yes
Ath_circ_FC4315	exon	ATCG00020	osa_circ_006520	exonic	LOC_Os10g21192	Yes
Ath_circ_FC4316	exon	ATCG00020	osa_circ_006520	exonic	LOC_Os10g21192	Yes
Ath_circ_FC4317	Intergenic	n/a	osa_circ_006520	exonic	LOC_Os10g21192	Yes
Ath_circ_FC4318	exon	ATCG00020	osa_circ_006520	exonic	LOC_Os10g21192	Yes
Ath_circ_FC4319	Intergenic	n/a	osa_circ_006520	exonic	LOC_Os10g21192	Yes
Ath_circ_FC4320	Intergenic	n/a	osa_circ_006520	exonic	LOC_Os10g21192	Yes
Ath_circ_FC4321	Intergenic	n/a	osa_circ_006520	exonic	LOC_Os10g21192	Yes
Ath_circ_FC4322	exon	ATCG00020	osa_circ_006520	exonic	LOC_Os10g21192	Yes
Ath_circ_FC4323	Intergenic	n/a	osa_circ_006520	exonic	LOC_Os10g21192	Yes
Ath_circ_FC4324	exon	ATCG00020	osa_circ_006520	exonic	LOC_Os10g21192	Yes
Ath_circ_FC4325	exon	ATCG00020	osa_circ_006520	exonic	LOC_Os10g21192	Yes
Ath_circ_FC4326	exon	ATCG00020	osa_circ_006520	exonic	LOC_Os10g21192	Yes
Ath_circ_FC4327	exon	ATCG00020	osa_circ_006520	exonic	LOC_Os10g21192	Yes
Ath_circ_FC4328	exon	ATCG00020	osa_circ_006520	exonic	LOC_Os10g21192	Yes
Ath_circ_FC4329	exon	ATCG00020	osa_circ_006520	exonic	LOC_Os10g21192	Yes
Ath_circ_FC4330	Intergenic	n/a	osa_circ_006520	exonic	LOC_Os10g21192	Yes
Ath_circ_FC4331	Intergenic	n/a	osa_circ_006520	exonic	LOC_Os10g21192	Yes
Ath_circ_FC4332	exon	ATCG00020	osa_circ_006520	exonic	LOC_Os10g21192	Yes
Ath_circ_FC4333	exon	ATCG00020	osa_circ_006520	exonic	LOC_Os10g21192	Yes
Ath_circ_FC4334	exon	ATCG00020	osa_circ_006520	exonic	LOC_Os10g21192	Yes
Ath_circ_FC4335	Intergenic	n/a	osa_circ_006520	exonic	LOC_Os10g21192	Yes
Ath_circ_FC4336	Intergenic	n/a	osa_circ_006520	exonic	LOC_Os10g21192	Yes
Ath_circ_FC4337	Intergenic	n/a	osa_circ_006520	exonic	LOC_Os10g21192	Yes
Ath_circ_FC4338	Intergenic	n/a	osa_circ_006520	exonic	LOC_Os10g21192	Yes
Ath_circ_FC4339	Intergenic	n/a	osa_circ_006520	exonic	LOC_Os10g21192	Yes
Ath_circ_FC4340	Intergenic	n/a	osa_circ_006520	exonic	LOC_Os10g21192	Yes
Ath_circ_FC4341	Intergenic	n/a	osa_circ_006520	exonic	LOC_Os10g21192	Yes
Ath_circ_FC4342	exon	ATCG00020	osa_circ_006520	exonic	LOC_Os10g21192	Yes
Ath_circ_FC4343	exon	ATCG00020	osa_circ_006520	exonic	LOC_Os10g21192	Yes
Ath_circ_FC4344	exon	ATCG00020	osa_circ_006520	exonic	LOC_Os10g21192	Yes
Ath_circ_FC4345	exon	ATCG00020	osa_circ_006520	exonic	LOC_Os10g21192	Yes
Ath_circ_FC4346	exon	ATCG00020	osa_circ_006520	exonic	LOC_Os10g21192	Yes
Ath_circ_FC4347	exon	ATCG00020	osa_circ_006520	exonic	LOC_Os10g21192	Yes
Ath_circ_FC4348	exon	ATCG00020	osa_circ_006520	exonic	LOC_Os10g21192	Yes
Ath_circ_FC4349	exon	ATCG00020	osa_circ_006520	exonic	LOC_Os10g21192	Yes
Ath_circ_FC4350	exon	ATCG00020	osa_circ_006520	exonic	LOC_Os10g21192	Yes
Ath_circ_FC4351	Intergenic	n/a	osa_circ_006520	exonic	LOC_Os10g21192	Yes
Ath_circ_FC4352	Intergenic	n/a	osa_circ_006520	exonic	LOC_Os10g21192	Yes
Ath_circ_FC4353	Intergenic	n/a	osa_circ_006520	exonic	LOC_Os10g21192	Yes
Ath_circ_FC4354	Intergenic	n/a	osa_circ_006520	exonic	LOC_Os10g21192	Yes
Ath_circ_FC4355	Intergenic	n/a	osa_circ_006520	exonic	LOC_Os10g21192	Yes
Ath_circ_FC4356	Intergenic	n/a	osa_circ_006520	exonic	LOC_Os10g21192	Yes
Ath_circ_FC4357	Intergenic	n/a	osa_circ_006520	exonic	LOC_Os10g21192	Yes
Ath_circ_FC4358	exon	ATCG00020	osa_circ_006520	exonic	LOC_Os10g21192	Yes
Ath_circ_FC4359	exon	ATCG00020	osa_circ_006520	exonic	LOC_Os10g21192	Yes
Ath_circ_FC4360	exon	ATCG00020	osa_circ_006520	exonic	LOC_Os10g21192	Yes
Ath_circ_FC4361	exon	ATCG00020	osa_circ_006520	exonic	LOC_Os10g21192	Yes
Ath_circ_FC4362	exon	ATCG00020	osa_circ_006520	exonic	LOC_Os10g21192	Yes
Ath_circ_FC4363	Intergenic	n/a	osa_circ_006520	exonic	LOC_Os10g21192	Yes
Ath_circ_FC4364	Intergenic	n/a	osa_circ_006520	exonic	LOC_Os10g21192	Yes
Ath_circ_FC4365	Intergenic	n/a	osa_circ_006520	exonic	LOC_Os10g21192	Yes
Ath_circ_FC4366	exon	ATCG00020	osa_circ_006520	exonic	LOC_Os10g21192	Yes
Ath_circ_FC4367	exon	ATCG00020	osa_circ_006520	exonic	LOC_Os10g21192	Yes
Ath_circ_FC4368	exon	ATCG00020	osa_circ_006520	exonic	LOC_Os10g21192	Yes
Ath_circ_FC4369	exon	ATCG00020	osa_circ_006520	exonic	LOC_Os10g21192	Yes
Ath_circ_FC4370	exon	ATCG00020	osa_circ_006520	exonic	LOC_Os10g21192	Yes
Ath_circ_FC4371	exon	ATCG00020	osa_circ_006520	exonic	LOC_Os10g21192	Yes
Ath_circ_FC4372	Intergenic	n/a	osa_circ_006520	exonic	LOC_Os10g21192	Yes
Ath_circ_FC4373	exon	ATCG00020	osa_circ_006520	exonic	LOC_Os10g21192	Yes
Ath_circ_FC4374	Intergenic	n/a	osa_circ_006520	exonic	LOC_Os10g21192	Yes
Ath_circ_FC4375	exon	ATCG00020	osa_circ_006520	exonic	LOC_Os10g21192	Yes
Ath_circ_FC4376	Intergenic	n/a	osa_circ_006520	exonic	LOC_Os10g21192	Yes
Ath_circ_FC4377	exon	ATCG00020	osa_circ_006520	exonic	LOC_Os10g21192	Yes
Ath_circ_FC4378	exon	ATCG00020	osa_circ_006520	exonic	LOC_Os10g21192	Yes
Ath_circ_FC4379	exon	ATCG00020	osa_circ_006520	exonic	LOC_Os10g21192	Yes
Ath_circ_FC4380	exon	ATCG00020	osa_circ_006520	exonic	LOC_Os10g21192	Yes
Ath_circ_FC4381	exon	ATCG00020	osa_circ_006520	exonic	LOC_Os10g21192	Yes
Ath_circ_FC4382	exon	ATCG00020	osa_circ_006520	exonic	LOC_Os10g21192	Yes
Ath_circ_FC4383	exon	ATCG00020	osa_circ_006520	exonic	LOC_Os10g21192	Yes
Ath_circ_FC4384	Intergenic	n/a	osa_circ_006520	exonic	LOC_Os10g21192	Yes
Ath_circ_FC4385	Intergenic	n/a	osa_circ_006520	exonic	LOC_Os10g21192	Yes
Ath_circ_FC4386	exon	ATCG00020	osa_circ_006520	exonic	LOC_Os10g21192	Yes
Ath_circ_FC4387	exon	ATCG00020	osa_circ_006520	exonic	LOC_Os10g21192	Yes
Ath_circ_FC4388	exon	ATCG00020	osa_circ_006520	exonic	LOC_Os10g21192	Yes
Ath_circ_FC4389	exon	ATCG00020	osa_circ_006520	exonic	LOC_Os10g21192	Yes
Ath_circ_FC4390	Intergenic	n/a	osa_circ_006520	exonic	LOC_Os10g21192	Yes
Ath_circ_FC4391	exon	ATCG00020	osa_circ_006520	exonic	LOC_Os10g21192	Yes
Ath_circ_FC4392	exon	ATCG00020	osa_circ_006520	exonic	LOC_Os10g21192	Yes
Ath_circ_FC4393	exon	ATCG00020	osa_circ_006520	exonic	LOC_Os10g21192	Yes
Ath_circ_FC4394	exon	ATCG00020	osa_circ_006520	exonic	LOC_Os10g21192	Yes
Ath_circ_FC4395	exon	ATCG00020	osa_circ_006520	exonic	LOC_Os10g21192	Yes
Ath_circ_FC4396	exon	ATCG00020	osa_circ_006520	exonic	LOC_Os10g21192	Yes
Ath_circ_FC4397	exon	ATCG00020	osa_circ_006520	exonic	LOC_Os10g21192	Yes
Ath_circ_FC4398	exon	ATCG00020	osa_circ_006520	exonic	LOC_Os10g21192	Yes
Ath_circ_FC4399	exon	ATCG00020	osa_circ_006520	exonic	LOC_Os10g21192	Yes
Ath_circ_FC4400	exon	ATCG00020	osa_circ_006520	exonic	LOC_Os10g21192	Yes
Ath_circ_FC4401	exon	ATCG00020	osa_circ_006520	exonic	LOC_Os10g21192	Yes
Ath_circ_FC4402	Intergenic	n/a	osa_circ_006520	exonic	LOC_Os10g21192	Yes
Ath_circ_FC4403	Intergenic	n/a	osa_circ_006520	exonic	LOC_Os10g21192	Yes
Ath_circ_FC4404	exon	ATCG00020	osa_circ_006520	exonic	LOC_Os10g21192	Yes
Ath_circ_FC4405	exon	ATCG00020	osa_circ_006520	exonic	LOC_Os10g21192	Yes
Ath_circ_FC4406	Intergenic	n/a	osa_circ_006520	exonic	LOC_Os10g21192	Yes
Ath_circ_FC4407	exon	ATCG00020	osa_circ_006520	exonic	LOC_Os10g21192	Yes
Ath_circ_FC4408	Intergenic	n/a	osa_circ_006520	exonic	LOC_Os10g21192	Yes
Ath_circ_FC4409	exon	ATCG00020	osa_circ_006520	exonic	LOC_Os10g21192	Yes
Ath_circ_FC4410	exon	ATCG00020	osa_circ_006520	exonic	LOC_Os10g21192	Yes
Ath_circ_FC4411	exon	ATCG00020	osa_circ_006520	exonic	LOC_Os10g21192	Yes
Ath_circ_FC4412	exon	ATCG00020	osa_circ_006520	exonic	LOC_Os10g21192	Yes
Ath_circ_FC4413	Intergenic	n/a	osa_circ_006520	exonic	LOC_Os10g21192	Yes
Ath_circ_FC4414	Intergenic	n/a	osa_circ_006520	exonic	LOC_Os10g21192	Yes
Ath_circ_FC4415	exon	ATCG00020	osa_circ_006520	exonic	LOC_Os10g21192	Yes
Ath_circ_FC4416	Intergenic	n/a	osa_circ_006520	exonic	LOC_Os10g21192	Yes
Ath_circ_FC4417	exon	ATCG00020	osa_circ_006520	exonic	LOC_Os10g21192	Yes
Ath_circ_FC4418	exon	ATCG00020	osa_circ_006520	exonic	LOC_Os10g21192	Yes
Ath_circ_FC4419	Intergenic	n/a	osa_circ_006520	exonic	LOC_Os10g21192	Yes
Ath_circ_FC4420	Intergenic	n/a	osa_circ_006520	exonic	LOC_Os10g21192	Yes
Ath_circ_FC4421	exon	ATCG00020	osa_circ_006520	exonic	LOC_Os10g21192	Yes
Ath_circ_FC4422	Intergenic	n/a	osa_circ_006520	exonic	LOC_Os10g21192	Yes
Ath_circ_FC4423	Intergenic	n/a	osa_circ_006520	exonic	LOC_Os10g21192	Yes
Ath_circ_FC4424	Intergenic	n/a	osa_circ_006520	exonic	LOC_Os10g21192	Yes
Ath_circ_FC4425	Intergenic	n/a	osa_circ_006520	exonic	LOC_Os10g21192	Yes
Ath_circ_FC4426	Intergenic	n/a	osa_circ_006520	exonic	LOC_Os10g21192	Yes
Ath_circ_FC4427	exon	ATCG00020	osa_circ_006520	exonic	LOC_Os10g21192	Yes
Ath_circ_FC4428	exon	ATCG00020	osa_circ_006520	exonic	LOC_Os10g21192	Yes
Ath_circ_FC4429	Intergenic	n/a	osa_circ_006520	exonic	LOC_Os10g21192	Yes
Ath_circ_FC4430	exon	ATCG00020	osa_circ_006520	exonic	LOC_Os10g21192	Yes
Ath_circ_FC4431	exon	ATCG00020	osa_circ_006520	exonic	LOC_Os10g21192	Yes
Ath_circ_FC4432	exon	ATCG00020	osa_circ_006520	exonic	LOC_Os10g21192	Yes
Ath_circ_FC4433	exon	ATCG00020	osa_circ_006520	exonic	LOC_Os10g21192	Yes
Ath_circ_FC4434	Intergenic	n/a	osa_circ_006520	exonic	LOC_Os10g21192	Yes
Ath_circ_FC4435	Intergenic	n/a	osa_circ_006520	exonic	LOC_Os10g21192	Yes
Ath_circ_FC4436	Intergenic	n/a	osa_circ_006520	exonic	LOC_Os10g21192	Yes
Ath_circ_FC4437	exon	ATCG00020	osa_circ_006520	exonic	LOC_Os10g21192	Yes
Ath_circ_FC4438	exon	ATCG00020	osa_circ_006520	exonic	LOC_Os10g21192	Yes
Ath_circ_FC4439	exon	ATCG00020	osa_circ_006520	exonic	LOC_Os10g21192	Yes
Ath_circ_FC4440	Intergenic	n/a	osa_circ_006520	exonic	LOC_Os10g21192	Yes
Ath_circ_FC4441	Intergenic	n/a	osa_circ_006520	exonic	LOC_Os10g21192	Yes
Ath_circ_FC4442	exon	ATCG00020	osa_circ_006520	exonic	LOC_Os10g21192	Yes
Ath_circ_FC4443	exon	ATCG00020	osa_circ_006520	exonic	LOC_Os10g21192	Yes
Ath_circ_FC4444	exon	ATCG00020	osa_circ_006520	exonic	LOC_Os10g21192	Yes
Ath_circ_FC4445	exon	ATCG00020	osa_circ_006520	exonic	LOC_Os10g21192	Yes
Ath_circ_FC4446	Intergenic	n/a	osa_circ_006520	exonic	LOC_Os10g21192	Yes
Ath_circ_FC4447	exon	ATCG00020	osa_circ_006520	exonic	LOC_Os10g21192	Yes
Ath_circ_FC4448	exon	ATCG00020	osa_circ_006520	exonic	LOC_Os10g21192	Yes
Ath_circ_FC4449	exon	ATCG00020	osa_circ_006520	exonic	LOC_Os10g21192	Yes
Ath_circ_FC4450	exon	ATCG00020	osa_circ_006520	exonic	LOC_Os10g21192	Yes
Ath_circ_FC4451	exon	ATCG00020	osa_circ_006520	exonic	LOC_Os10g21192	Yes
Ath_circ_FC4452	exon	ATCG00020	osa_circ_006520	exonic	LOC_Os10g21192	Yes
Ath_circ_FC4453	Intergenic	n/a	osa_circ_006520	exonic	LOC_Os10g21192	Yes
Ath_circ_FC4454	exon	ATCG00020	osa_circ_006520	exonic	LOC_Os10g21192	Yes
Ath_circ_FC4455	exon	ATCG00020	osa_circ_006520	exonic	LOC_Os10g21192	Yes
Ath_circ_FC4456	exon	ATCG00020	osa_circ_006520	exonic	LOC_Os10g21192	Yes
Ath_circ_FC4457	exon	ATCG00020	osa_circ_006520	exonic	LOC_Os10g21192	Yes
Ath_circ_FC4458	exon	ATCG00020	osa_circ_006520	exonic	LOC_Os10g21192	Yes
Ath_circ_FC4459	exon	ATCG00020	osa_circ_006520	exonic	LOC_Os10g21192	Yes
Ath_circ_FC4460	Intergenic	n/a	osa_circ_006520	exonic	LOC_Os10g21192	Yes
Ath_circ_FC4461	exon	ATCG00020	osa_circ_006520	exonic	LOC_Os10g21192	Yes
Ath_circ_FC4462	exon	ATCG00020	osa_circ_006520	exonic	LOC_Os10g21192	Yes
Ath_circ_FC4463	exon	ATCG00020	osa_circ_006520	exonic	LOC_Os10g21192	Yes
Ath_circ_FC4464	exon	ATCG00020	osa_circ_006520	exonic	LOC_Os10g21192	Yes
Ath_circ_FC4465	exon	ATCG00020	osa_circ_006520	exonic	LOC_Os10g21192	Yes
Ath_circ_FC4466	Intergenic	n/a	osa_circ_006520	exonic	LOC_Os10g21192	Yes
Ath_circ_FC4467	Intergenic	n/a	osa_circ_006520	exonic	LOC_Os10g21192	Yes
Ath_circ_FC4468	exon	ATCG00020	osa_circ_006520	exonic	LOC_Os10g21192	Yes
Ath_circ_FC4469	exon	ATCG00020	osa_circ_006520	exonic	LOC_Os10g21192	Yes
Ath_circ_FC4470	exon	ATCG00020	osa_circ_006520	exonic	LOC_Os10g21192	Yes
Ath_circ_FC4471	Intergenic	n/a	osa_circ_006520	exonic	LOC_Os10g21192	Yes
Ath_circ_FC4472	Intergenic	n/a	osa_circ_006520	exonic	LOC_Os10g21192	Yes
Ath_circ_FC4473	exon	ATCG00020	osa_circ_006520	exonic	LOC_Os10g21192	Yes
Ath_circ_FC4474	Intergenic	n/a	osa_circ_006520	exonic	LOC_Os10g21192	Yes
Ath_circ_FC4475	Intergenic	n/a	osa_circ_006520	exonic	LOC_Os10g21192	Yes
Ath_circ_FC4476	exon	ATCG00020	osa_circ_006520	exonic	LOC_Os10g21192	Yes
Ath_circ_FC4477	Intergenic	n/a	osa_circ_006520	exonic	LOC_Os10g21192	Yes
Ath_circ_FC4478	Intergenic	n/a	osa_circ_006520	exonic	LOC_Os10g21192	Yes
Ath_circ_FC4479	exon	ATCG00020	osa_circ_006520	exonic	LOC_Os10g21192	Yes
Ath_circ_FC4480	exon	ATCG00020	osa_circ_006520	exonic	LOC_Os10g21192	Yes
Ath_circ_FC4481	exon	ATCG00020	osa_circ_006520	exonic	LOC_Os10g21192	Yes
Ath_circ_FC4482	Intergenic	n/a	osa_circ_006520	exonic	LOC_Os10g21192	Yes
Ath_circ_FC4483	exon	ATCG00020	osa_circ_006520	exonic	LOC_Os10g21192	Yes
Ath_circ_FC4484	exon	ATCG00020	osa_circ_006520	exonic	LOC_Os10g21192	Yes
Ath_circ_FC4485	exon	ATCG00020	osa_circ_006520	exonic	LOC_Os10g21192	Yes
Ath_circ_FC4486	Intergenic	n/a	osa_circ_006520	exonic	LOC_Os10g21192	Yes
Ath_circ_FC4487	exon	ATCG00020	osa_circ_006520	exonic	LOC_Os10g21192	Yes
Ath_circ_FC4488	exon	ATCG00020	osa_circ_006520	exonic	LOC_Os10g21192	Yes
Ath_circ_FC4489	exon	ATCG00020	osa_circ_006520	exonic	LOC_Os10g21192	Yes
Ath_circ_FC4490	Intergenic	n/a	osa_circ_006520	exonic	LOC_Os10g21192	Yes
Ath_circ_FC4491	exon	ATCG00020	osa_circ_006520	exonic	LOC_Os10g21192	Yes
Ath_circ_FC4492	exon	ATCG00020	osa_circ_006520	exonic	LOC_Os10g21192	Yes
Ath_circ_FC4493	exon	ATCG00020	osa_circ_006520	exonic	LOC_Os10g21192	Yes
Ath_circ_FC4494	exon	ATCG00020	osa_circ_006520	exonic	LOC_Os10g21192	Yes
Ath_circ_FC4495	exon	ATCG00020	osa_circ_006520	exonic	LOC_Os10g21192	Yes
Ath_circ_FC4496	Intergenic	n/a	osa_circ_006520	exonic	LOC_Os10g21192	Yes
Ath_circ_FC4497	exon	ATCG00020	osa_circ_006520	exonic	LOC_Os10g21192	Yes
Ath_circ_FC4498	Intergenic	n/a	osa_circ_006520	exonic	LOC_Os10g21192	Yes
Ath_circ_FC4499	exon	ATCG00020	osa_circ_006520	exonic	LOC_Os10g21192	Yes
Ath_circ_FC4500	exon	ATCG00020	osa_circ_006520	exonic	LOC_Os10g21192	Yes
Ath_circ_FC4501	exon	ATCG00020	osa_circ_006520	exonic	LOC_Os10g21192	Yes
Ath_circ_FC4502	Intergenic	n/a	osa_circ_006520	exonic	LOC_Os10g21192	Yes
Ath_circ_FC4503	exon	ATCG00020	osa_circ_006520	exonic	LOC_Os10g21192	Yes
Ath_circ_FC4504	exon	ATCG00020	osa_circ_006520	exonic	LOC_Os10g21192	Yes
Ath_circ_FC4505	Intergenic	n/a	osa_circ_006520	exonic	LOC_Os10g21192	Yes
Ath_circ_FC4506	exon	ATCG00020	osa_circ_006520	exonic	LOC_Os10g21192	Yes
Ath_circ_FC4507	exon	ATCG00020	osa_circ_006520	exonic	LOC_Os10g21192	Yes
Ath_circ_FC4508	exon	ATCG00020	osa_circ_006520	exonic	LOC_Os10g21192	Yes
Ath_circ_FC4509	exon	ATCG00020	osa_circ_006520	exonic	LOC_Os10g21192	Yes
Ath_circ_FC4510	Intergenic	n/a	osa_circ_006520	exonic	LOC_Os10g21192	Yes
Ath_circ_FC4511	exon	ATCG00020	osa_circ_006520	exonic	LOC_Os10g21192	Yes
Ath_circ_FC4512	exon	ATCG00020	osa_circ_006520	exonic	LOC_Os10g21192	Yes
Ath_circ_FC4513	Intergenic	n/a	osa_circ_006520	exonic	LOC_Os10g21192	Yes
Ath_circ_FC4514	Intergenic	n/a	osa_circ_006520	exonic	LOC_Os10g21192	Yes
Ath_circ_FC4515	exon	ATCG00020	osa_circ_006520	exonic	LOC_Os10g21192	Yes
Ath_circ_FC4516	exon	ATCG00020	osa_circ_006520	exonic	LOC_Os10g21192	Yes
Ath_circ_FC4517	Intergenic	n/a	osa_circ_006520	exonic	LOC_Os10g21192	Yes
Ath_circ_FC4518	Intergenic	n/a	osa_circ_011322	exonic	LOC_Os12g23610	Yes
Ath_circ_FC4519	exon	ATCG00020	osa_circ_006520	exonic	LOC_Os10g21192	Yes
Ath_circ_FC4520	exon	ATCG00020	osa_circ_006520	exonic	LOC_Os10g21192	Yes
Ath_circ_FC4521	exon	ATCG00020	osa_circ_006520	exonic	LOC_Os10g21192	Yes
Ath_circ_FC4522	Intergenic	n/a	osa_circ_006520	exonic	LOC_Os10g21192	Yes
Ath_circ_FC4523	Intergenic	n/a	osa_circ_006520	exonic	LOC_Os10g21192	Yes
Ath_circ_FC4524	Intergenic	n/a	osa_circ_006520	exonic	LOC_Os10g21192	Yes
Ath_circ_FC4525	exon	ATCG00020	osa_circ_006520	exonic	LOC_Os10g21192	Yes
Ath_circ_FC4526	exon	ATCG00020	osa_circ_006520	exonic	LOC_Os10g21192	Yes
Ath_circ_FC4527	Intergenic	n/a	osa_circ_006520	exonic	LOC_Os10g21192	Yes
Ath_circ_FC4528	exon	ATCG00020	osa_circ_006520	exonic	LOC_Os10g21192	Yes
Ath_circ_FC4529	Intergenic	n/a	osa_circ_006520	exonic	LOC_Os10g21192	Yes
Ath_circ_FC4530	Intergenic	n/a	osa_circ_006520	exonic	LOC_Os10g21192	Yes
Ath_circ_FC4531	exon	ATCG00020	osa_circ_006520	exonic	LOC_Os10g21192	Yes
Ath_circ_FC4532	exon	ATCG00020	osa_circ_006520	exonic	LOC_Os10g21192	Yes
Ath_circ_FC4533	exon	ATCG00020	osa_circ_006520	exonic	LOC_Os10g21192	Yes
Ath_circ_FC4534	exon	ATCG00020	osa_circ_006520	exonic	LOC_Os10g21192	Yes
Ath_circ_FC4535	exon	ATCG00020	osa_circ_006520	exonic	LOC_Os10g21192	Yes
Ath_circ_FC4536	exon	ATCG00020	osa_circ_006520	exonic	LOC_Os10g21192	Yes
Ath_circ_FC4537	exon	ATCG00020	osa_circ_006520	exonic	LOC_Os10g21192	Yes
Ath_circ_FC4538	exon	ATCG00020	osa_circ_006520	exonic	LOC_Os10g21192	Yes
Ath_circ_FC4539	Intergenic	n/a	osa_circ_011322	exonic	LOC_Os12g23610	Yes
Ath_circ_FC4540	exon	ATCG00020	osa_circ_006520	exonic	LOC_Os10g21192	Yes
Ath_circ_FC4541	exon	ATCG00020	osa_circ_006520	exonic	LOC_Os10g21192	Yes
Ath_circ_FC4542	Intergenic	n/a	osa_circ_006520	exonic	LOC_Os10g21192	Yes
Ath_circ_FC4543	exon	ATCG00020	osa_circ_006520	exonic	LOC_Os10g21192	Yes
Ath_circ_FC4544	Intergenic	n/a	osa_circ_011322	exonic	LOC_Os12g23610	Yes
Ath_circ_FC4545	exon	ATCG00020	osa_circ_006520	exonic	LOC_Os10g21192	Yes
Ath_circ_FC4546	Intergenic	n/a	osa_circ_006520	exonic	LOC_Os10g21192	Yes
Ath_circ_FC4547	Intergenic	n/a	osa_circ_011322	exonic	LOC_Os12g23610	Yes
Ath_circ_FC4548	exon	ATCG00020	osa_circ_006520	exonic	LOC_Os10g21192	Yes
Ath_circ_FC4549	Intergenic	n/a	osa_circ_006520	exonic	LOC_Os10g21192	Yes
Ath_circ_FC4550	Intergenic	n/a	osa_circ_011322	exonic	LOC_Os12g23610	Yes
Ath_circ_FC4551	exon	ATCG00020	osa_circ_006520	exonic	LOC_Os10g21192	Yes
Ath_circ_FC4552	Intergenic	n/a	osa_circ_006520	exonic	LOC_Os10g21192	Yes
Ath_circ_FC4553	Intergenic	n/a	osa_circ_006520	exonic	LOC_Os10g21192	Yes
Ath_circ_FC4554	Intergenic	n/a	osa_circ_006520	exonic	LOC_Os10g21192	Yes
Ath_circ_FC4555	Intergenic	n/a	osa_circ_006520	exonic	LOC_Os10g21192	Yes
Ath_circ_FC4556	Intergenic	n/a	osa_circ_006520	exonic	LOC_Os10g21192	Yes
Ath_circ_FC4557	Intergenic	n/a	osa_circ_006520	exonic	LOC_Os10g21192	Yes
Ath_circ_FC4558	Intergenic	n/a	osa_circ_006520	exonic	LOC_Os10g21192	Yes
Ath_circ_FC4559	Intergenic	n/a	osa_circ_011322	exonic	LOC_Os12g23610	Yes
Ath_circ_FC4560	Intergenic	n/a	osa_circ_006520	exonic	LOC_Os10g21192	Yes
Ath_circ_FC4561	Intergenic	n/a	osa_circ_006520	exonic	LOC_Os10g21192	Yes
Ath_circ_FC4562	Intergenic	n/a	osa_circ_006520	exonic	LOC_Os10g21192	Yes
Ath_circ_FC4563	Intergenic	n/a	osa_circ_009052	exonic	LOC_Os11g17080	Yes
Ath_circ_FC4564	Intergenic	n/a	osa_circ_011322	exonic	LOC_Os12g23610	Yes
Ath_circ_FC4565	Intergenic	n/a	osa_circ_006520	exonic	LOC_Os10g21192	Yes
Ath_circ_FC4566	Intergenic	n/a	osa_circ_006544	exonic	LOC_Os10g21230	Yes
Ath_circ_FC4567	Intergenic	n/a	osa_circ_011322	exonic	LOC_Os12g23610	Yes
Ath_circ_FC4568	Intergenic	n/a	osa_circ_009052	exonic	LOC_Os11g17080	Yes
Ath_circ_FC4569	Intergenic	n/a	osa_circ_006544	exonic	LOC_Os10g21230	Yes
Ath_circ_FC4570	Intergenic	n/a	osa_circ_006544	exonic	LOC_Os10g21230	Yes
Ath_circ_FC4571	Intergenic	n/a	osa_circ_006544	exonic	LOC_Os10g21230	Yes
Ath_circ_FC4572	Intergenic	n/a	osa_circ_011322	exonic	LOC_Os12g23610	Yes
Ath_circ_FC4573	Intergenic	n/a	osa_circ_011322	exonic	LOC_Os12g23610	Yes
Ath_circ_FC4574	Intergenic	n/a	osa_circ_020742	exonic	LOC_Os03g43800	Yes
Ath_circ_FC4575	Intergenic	n/a	osa_circ_011322	exonic	LOC_Os12g23610	Yes
Ath_circ_FC4577	Intergenic	n/a	osa_circ_011322	exonic	LOC_Os12g23610	Yes
Ath_circ_FC4578	Intergenic	n/a	osa_circ_006544	exonic	LOC_Os10g21230	Yes
Ath_circ_FC4580	Intergenic	n/a	osa_circ_011322	exonic	LOC_Os12g23610	Yes
Ath_circ_FC4581	Intergenic	n/a	osa_circ_011322	exonic	LOC_Os12g23610	Yes
Ath_circ_FC4582	Intergenic	n/a	osa_circ_011322	exonic	LOC_Os12g23610	Yes
Ath_circ_FC4583	Intergenic	n/a	osa_circ_011322	exonic	LOC_Os12g23610	Yes
Ath_circ_FC4584	Intergenic	n/a	osa_circ_006568	intronic	LOC_Os10g21396	Yes
Ath_circ_FC4585	Intergenic	n/a	osa_circ_006568	intronic	LOC_Os10g21396	Yes
Ath_circ_FC4586	Intergenic	n/a	osa_circ_020742	exonic	LOC_Os03g43800	Yes
Ath_circ_FC4587	Intergenic	n/a	osa_circ_011322	exonic	LOC_Os12g23610	Yes
Ath_circ_FC4588	Intergenic	n/a	osa_circ_006544	exonic	LOC_Os10g21230	Yes
Ath_circ_FC4590	Intergenic	n/a	osa_circ_006544	exonic	LOC_Os10g21230	Yes
Ath_circ_FC4591	Intergenic	n/a	osa_circ_006544	exonic	LOC_Os10g21230	Yes
Ath_circ_FC4592	Intergenic	n/a	osa_circ_006544	exonic	LOC_Os10g21230	Yes
Ath_circ_FC4593	Intergenic	n/a	osa_circ_011322	exonic	LOC_Os12g23610	Yes
Ath_circ_FC4595	Intergenic	n/a	osa_circ_011322	exonic	LOC_Os12g23610	Yes
Ath_circ_FC4599	Intergenic	n/a	osa_circ_011322	exonic	LOC_Os12g23610	Yes
Ath_circ_FC4600	Intergenic	n/a	osa_circ_020742	exonic	LOC_Os03g43800	Yes
Ath_circ_FC4601	Intergenic	n/a	osa_circ_011322	exonic	LOC_Os12g23610	Yes
Ath_circ_FC4603	Intergenic	n/a	osa_circ_011322	exonic	LOC_Os12g23610	Yes
Ath_circ_FC4605	Intergenic	n/a	osa_circ_011322	exonic	LOC_Os12g23610	Yes
Ath_circ_FC4606	Intergenic	n/a	osa_circ_011322	exonic	LOC_Os12g23610	Yes
Ath_circ_FC4607	Intergenic	n/a	osa_circ_011322	exonic	LOC_Os12g23610	Yes
[truncated: 367 more rows]

## Sheet: H. vulgare
H. vulgare
#CircRNAs	circRNA_type	Parent genes	CircRNAs	circRNA_type	Parent genes	Sequence similarity for circRNAs
Ath_circ_FC0472	exon	AT1G21730	hvu_circ_000003	exonic	MLOC_10504	Yes
Ath_circ_FC0914	exon	AT1G68290	hvu_circ_000018	exonic	MLOC_54960	Yes
Ath_circ_FC1520	exon	AT2G36070	hvu_circ_000032	exonic	MLOC_17150	Yes
Ath_circ_FC1556	exon	AT2G38170	hvu_circ_000025	intronic	MLOC_37140	Yes
Ath_circ_FC1557	exon	AT2G38170	hvu_circ_000025	intronic	MLOC_37140	Yes
Ath_circ_FC3355	exon	AT5G17920	hvu_circ_000007	intergenic	NA	Yes
Ath_circ_FC3848	Intergenic	n/a	hvu_circ_000034	intronic	MLOC_63436	Yes
Ath_circ_FC4023	exon	ATMG01360	hvu_circ_000001	exonic	MLOC_370	Yes
Ath_circ_FC4024	Intergenic	n/a	hvu_circ_000001	exonic	MLOC_370	Yes
Ath_circ_FC4025	exon	ATMG01360	hvu_circ_000001	exonic	MLOC_370	Yes
Ath_circ_FC4026	Intergenic	n/a	hvu_circ_000001	exonic	MLOC_370	Yes
Ath_circ_FC4027	Intergenic	n/a	hvu_circ_000001	exonic	MLOC_370	Yes
Ath_circ_FC4028	Intergenic	n/a	hvu_circ_000001	exonic	MLOC_370	Yes
Ath_circ_FC4029	exon	ATMG01360	hvu_circ_000001	exonic	MLOC_370	Yes
Ath_circ_FC4030	Intergenic	n/a	hvu_circ_000001	exonic	MLOC_370	Yes
Ath_circ_FC4031	Intergenic	n/a	hvu_circ_000001	exonic	MLOC_370	Yes
Ath_circ_FC4032	Intergenic	n/a	hvu_circ_000001	exonic	MLOC_370	Yes
Ath_circ_FC4788	Intergenic	-	hvu_circ_000007	intergenic	NA	Yes
Ath_circ_FC4828	exon	AT3G41768	hvu_circ_000007	intergenic	NA	Yes
Ath_circ_FC4889	Intergenic	-	hvu_circ_000007	intergenic	NA	Yes
Ath_circ_FC5162	Intergenic	-	hvu_circ_000007	intergenic	NA	Yes
Ath_circ_FC5688	Intergenic	-	hvu_circ_000007	intergenic	NA	Yes

## Sheet: S. lycopersicum 
S. lycopersicum
#CircRNAs	circRNA_type	Parent genes	CircRNAs	circRNA_type	Parent genes	Sequence similarity for circRNAs
Ath_circ_FC0014	exon	AT1G16270	sly_circ_000651	exonic	Solyc07g006760.2	Yes
Ath_circ_FC0039	exon	AT2G38410	sly_circ_000497	exonic	Solyc04g063280.2	Yes
Ath_circ_FC0076	exon	AT5G35700	sly_circ_000718	exonic	Solyc07g065080.2	Yes
Ath_circ_FC0083	exon	ATMG00030	sly_circ_000160	intergenic	NA	Yes
Ath_circ_FC0084	exon	ATMG00030	sly_circ_000160	intergenic	NA	Yes
Ath_circ_FC0085	exon	ATMG00030	sly_circ_000160	intergenic	NA	Yes
Ath_circ_FC0086	Intergenic	-	sly_circ_000160	intergenic	NA	Yes
Ath_circ_FC0123	exon	AT1G01520	sly_circ_000594	exonic	Solyc06g036300.2	Yes
Ath_circ_FC0150	exon	AT1G02890	sly_circ_000746	exonic	Solyc08g063050.2	Yes
Ath_circ_FC0169	exon	AT1G04410	sly_circ_000837	exonic	Solyc09g090140.2	Yes
Ath_circ_FC0175	Intergenic	n/a	sly_circ_000031	exonic	Solyc01g066940.2	Yes
Ath_circ_FC0176	Intergenic	n/a	sly_circ_000031	exonic	Solyc01g066940.2	Yes
Ath_circ_FC0180	exon	AT1G05010	sly_circ_000700	exonic	Solyc07g049530.2/Solyc07g049550.2	Yes
Ath_circ_FC0181	exon	AT1G05010	sly_circ_000700	exonic	Solyc07g049530.2/Solyc07g049550.2	Yes
Ath_circ_FC0208	exon	AT1G06070	sly_circ_000605	exonic	Solyc06g053350.2	Yes
Ath_circ_FC0209	exon	AT1G06070	sly_circ_000605	exonic	Solyc06g053350.2	Yes
Ath_circ_FC0217	exon	AT1G06700	sly_circ_000284	exonic	Solyc12g098820.1	Yes
Ath_circ_FC0218	exon	AT1G06700	sly_circ_000284	exonic	Solyc12g098820.1	Yes
Ath_circ_FC0250	exon	AT1G08510	sly_circ_000241	exonic	Solyc12g006930.1	Yes
Ath_circ_FC0265	exon	AT1G09140	sly_circ_000582	exonic	Solyc06g009060.2	Yes
Ath_circ_FC0315	exon	AT1G11950	sly_circ_000749	exonic	Solyc08g065810.1	Yes
Ath_circ_FC0326	exon	AT1G12470	sly_circ_000576	exonic	Solyc06g005080.2	Yes
Ath_circ_FC0331	exon	AT1G12930	sly_circ_000360	exonic	Solyc02g094610.1	Yes
Ath_circ_FC0333	exon	AT1G13180	sly_circ_000471	exonic	Solyc04g024530.2	Yes
Ath_circ_FC0334	exon	AT1G13320	sly_circ_000621	exonic	Solyc06g069180.2	Yes
Ath_circ_FC0350	exon	AT1G15030	sly_circ_000534	exonic	Solyc05g008920.2	Yes
Ath_circ_FC0352	exon	AT1G15110	sly_circ_000451	exonic	Solyc04g007520.2	Yes
Ath_circ_FC0387	exon	AT1G15750	sly_circ_000425	exonic	Solyc03g116750.2	Yes
Ath_circ_FC0388	exon	AT1G15750	sly_circ_000425	exonic	Solyc03g116750.2	Yes
Ath_circ_FC0432	exon	AT1G19600	sly_circ_000524	exonic	Solyc04g080580.2	Yes
Ath_circ_FC0465	exon	AT1G21380	sly_circ_000497	exonic	Solyc04g063280.2	Yes
Ath_circ_FC0468	exon	AT1G21630	sly_circ_000329	exonic	Solyc02g082540.2	Yes
Ath_circ_FC0478	exon	AT1G22410	sly_circ_000503	exonic	Solyc04g074480.2	Yes
Ath_circ_FC0480	exon	AT1G22620	sly_circ_000207	exonic	Solyc11g022380.1	Yes
Ath_circ_FC0569	exon	AT1G30490	sly_circ_000754	exonic	Solyc08g066500.2	Yes
Ath_circ_FC0580	exon	AT1G30640	sly_circ_000788	exonic	Solyc08g077780.2	Yes
Ath_circ_FC0653	exon	AT1G43850	sly_circ_000608	exonic	Solyc06g059750.2/Solyc06g059760.2	Yes
Ath_circ_FC0708	exon	AT1G48850	sly_circ_000480	exonic	Solyc04g049350.2	Yes
Ath_circ_FC0709	exon	AT1G48850	sly_circ_000480	exonic	Solyc04g049350.2	Yes
Ath_circ_FC0717	exon	AT1G49730	sly_circ_000530	exonic	Solyc05g007140.2	Yes
Ath_circ_FC0735	exon	AT1G50380	sly_circ_000297	exonic	Solyc02g050240.2	Yes
Ath_circ_FC0753	exon	AT1G52150	sly_circ_000754	exonic	Solyc08g066500.2	Yes
Ath_circ_FC0754	exon	AT1G52150	sly_circ_000754	exonic	Solyc08g066500.2	Yes
Ath_circ_FC0755	exon	AT1G52150	sly_circ_000754	exonic	Solyc08g066500.2	Yes
Ath_circ_FC0756	exon	AT1G52150	sly_circ_000754	exonic	Solyc08g066500.2	Yes
Ath_circ_FC0757	exon	AT1G52150	sly_circ_000754	exonic	Solyc08g066500.2	Yes
Ath_circ_FC0772	exon	AT1G53650	sly_circ_000249	exonic	Solyc12g011340.1	Yes
Ath_circ_FC0790	exon	AT1G55520	sly_circ_000028	exonic	Solyc01g028930.2	Yes
Ath_circ_FC0798	exon	AT1G56070	sly_circ_000745	exonic	Solyc08g062910.2/Solyc08g062920.2	Yes
Ath_circ_FC0799	exon	AT1G56070	sly_circ_000745	exonic	Solyc08g062910.2/Solyc08g062920.2	Yes
Ath_circ_FC0800	Intergenic	n/a	sly_circ_000082	exonic	Solyc01g099770.2/Solyc01g099780.2	Yes
Ath_circ_FC0807	exon	AT1G56560	sly_circ_000085	exonic	Solyc01g100810.2	Yes
Ath_circ_FC0822	exon	AT1G59610	sly_circ_000210	exonic	Solyc11g039650.1	Yes
Ath_circ_FC0829	exon	AT1G60070	sly_circ_000474	exonic	Solyc04g025870.2	Yes
Ath_circ_FC0833	Intergenic	n/a	sly_circ_000850	exonic	Solyc09g097960.2/Solyc09g097970.2	Yes
Ath_circ_FC0893	exon	AT1G65840	sly_circ_000328	exonic	Solyc02g081390.2	Yes
Ath_circ_FC0894	exon	AT1G65930	sly_circ_000004	exonic	Solyc01g005560.2	Yes
Ath_circ_FC0903	exon	AT1G67120	sly_circ_000501	exonic	Solyc04g072260.1	Yes
Ath_circ_FC0934	exon	AT1G70490	sly_circ_000086	exonic	Solyc01g100860.2/Solyc01g100870.2	Yes
Ath_circ_FC0971	exon	AT1G72710	sly_circ_000761	exonic	Solyc08g066870.2	Yes
Ath_circ_FC0972	exon	AT1G72710	sly_circ_000761	exonic	Solyc08g066870.2	Yes
Ath_circ_FC0980	exon	AT1G73430	sly_circ_000658	exonic	Solyc07g017530.2	Yes
Ath_circ_FC0997	exon	AT1G74040	sly_circ_000734	exonic	Solyc08g014130.2	Yes
Ath_circ_FC1045	exon	AT1G77410	sly_circ_000205	exonic	Solyc11g018500.1	Yes
Ath_circ_FC1060	exon	AT1G78290	sly_circ_000788	exonic	Solyc08g077780.2	Yes
Ath_circ_FC1061	exon	AT1G78290	sly_circ_000788	exonic	Solyc08g077780.2	Yes
Ath_circ_FC1076	exon	AT1G79350	sly_circ_000132	exonic	Solyc10g005490.2	Yes
Ath_circ_FC1077	exon	AT1G79350	sly_circ_000132	exonic	Solyc10g005490.2	Yes
Ath_circ_FC1078	exon	AT1G79350	sly_circ_000132	exonic	Solyc10g005490.2	Yes
Ath_circ_FC1127	exon	AT2G01450	sly_circ_000043	exonic	Solyc01g080240.2	Yes
Ath_circ_FC1128	exon	AT2G01450	sly_circ_000043	exonic	Solyc01g080240.2	Yes
Ath_circ_FC1129	exon	AT2G01460	sly_circ_000532	exonic	Solyc05g007990.2	Yes
Ath_circ_FC1142	exon	AT2G02800	sly_circ_000530	exonic	Solyc05g007140.2	Yes
Ath_circ_FC1143	exon	AT2G02800	sly_circ_000530	exonic	Solyc05g007140.2	Yes
Ath_circ_FC1186	Intergenic	n/a	sly_circ_000433	intergenic	NA	Yes
Ath_circ_FC1199	exon	AT2G14050	sly_circ_000112	exonic	Solyc01g105520.2/Solyc01g105530.2	Yes
Ath_circ_FC1200	exon	AT2G14050	sly_circ_000112	exonic	Solyc01g105520.2/Solyc01g105530.2	Yes
Ath_circ_FC1242	exon	AT2G19470	sly_circ_000760	exonic	Solyc08g066870.2	Yes
Ath_circ_FC1258	exon	AT2G20360	sly_circ_000827	exonic	Solyc09g064450.2	Yes
Ath_circ_FC1270	exon	AT2G20580	sly_circ_000704	exonic	Solyc07g053650.2	Yes
Ath_circ_FC1302	exon	AT2G22300	sly_circ_000493	exonic	Solyc04g056270.2	Yes
Ath_circ_FC1309	exon	AT2G22990	sly_circ_000515	exonic	Solyc04g077630.2/Solyc04g077650.2	Yes
Ath_circ_FC1314	exon	AT2G24120	sly_circ_000541	exonic	Solyc05g010660.2	Yes
Ath_circ_FC1327	exon	AT2G25170	sly_circ_000738	exonic	Solyc08g029120.1	Yes
Ath_circ_FC1344	exon	AT2G26140	sly_circ_000746	exonic	Solyc08g063050.2	Yes
Ath_circ_FC1350	exon	AT2G26580	sly_circ_000653	exonic	Solyc07g008180.2	Yes
Ath_circ_FC1353	exon	AT2G26910	sly_circ_000845	exonic	Solyc09g091660.2	Yes
Ath_circ_FC1367	exon	AT2G27900	sly_circ_000227	exonic	Solyc11g066540.1	Yes
Ath_circ_FC1376	exon	AT2G28360	sly_circ_000230	exonic	Solyc11g069490.1	Yes
Ath_circ_FC1384	exon	AT2G28590	sly_circ_000577	exonic	Solyc06g005500.2	Yes
Ath_circ_FC1399	exon	AT2G30390	sly_circ_000748	exonic	Solyc08g065480.2	Yes
Ath_circ_FC1412	exon	AT2G30740	sly_circ_000284	exonic	Solyc12g098820.1	Yes
Ath_circ_FC1420	exon	AT2G30980	sly_circ_000091	exonic	Solyc01g101000.2	Yes
Ath_circ_FC1429	exon	AT2G31510	sly_circ_000630	exonic	Solyc06g073340.2	Yes
Ath_circ_FC1431	exon	AT2G31570	sly_circ_000728	exonic	Solyc08g006720.2	Yes
Ath_circ_FC1460	exon	AT2G32430	sly_circ_000764	exonic	Solyc08g069060.2	Yes
Ath_circ_FC1498	exon	AT2G35050	sly_circ_000651	exonic	Solyc07g006760.2	Yes
Ath_circ_FC1504	exon	AT2G35630	sly_circ_000320	exonic	Solyc02g078640.2	Yes
Ath_circ_FC1556	exon	AT2G38170	sly_circ_000706	exonic	Solyc07g056110.2	Yes
Ath_circ_FC1557	exon	AT2G38170	sly_circ_000706	exonic	Solyc07g056110.2	Yes
Ath_circ_FC1580	exon	AT2G39660	sly_circ_000577	exonic	Solyc06g005500.2	Yes
Ath_circ_FC1605	exon	AT2G40520	sly_circ_000061	exonic	Solyc01g095730.2	Yes
Ath_circ_FC1611	exon	AT2G40840	sly_circ_000293	exonic	Solyc02g020980.2	Yes
Ath_circ_FC1617	exon	AT2G41220	sly_circ_000391	exonic	Solyc03g063560.2	Yes
Ath_circ_FC1629	exon	AT2G41700	sly_circ_000470	exonic	Solyc04g015970.2	Yes
Ath_circ_FC1630	exon	AT2G41740	sly_circ_000467	exonic	Solyc04g015830.2	Yes
Ath_circ_FC1640	exon	AT2G42500	sly_circ_000036	exonic	Solyc01g073650.2	Yes
Ath_circ_FC1760	exon	AT3G01540	sly_circ_000262	exonic	Solyc12g035130.1	Yes
Ath_circ_FC1761	exon	AT3G01540	sly_circ_000262	exonic	Solyc12g035130.1	Yes
Ath_circ_FC1779	exon	AT3G02450	sly_circ_000746	exonic	Solyc08g063050.2	Yes
Ath_circ_FC1780	exon	AT3G02450	sly_circ_000746	exonic	Solyc08g063050.2	Yes
Ath_circ_FC1825	exon	AT3G05530	sly_circ_000746	exonic	Solyc08g063050.2	Yes
Ath_circ_FC1838	exon	AT3G06400	sly_circ_000032	exonic	Solyc01g067390.2	Yes
Ath_circ_FC1842	exon	AT3G06500	sly_circ_000085	exonic	Solyc01g100810.2	Yes
Ath_circ_FC1865	exon	AT3G07810	sly_circ_000698	exonic	Solyc07g048030.2	Yes
Ath_circ_FC1895	exon	AT3G10350	sly_circ_000472	exonic	Solyc04g025160.2	Yes
Ath_circ_FC1901	exon	AT3G10640	sly_circ_000571	exonic	Solyc05g055170.2	Yes
Ath_circ_FC1934	Intergenic	n/a	sly_circ_000639	intergenic	NA	Yes
Ath_circ_FC1943	exon	AT3G12760	sly_circ_000722	exonic	Solyc07g066650.2	Yes
Ath_circ_FC1962	exon	AT3G13920	sly_circ_000282	exonic	Solyc12g095990.1/Solyc12g096000.1	Yes
Ath_circ_FC1970	exon	AT3G14205	sly_circ_000207	exonic	Solyc11g022380.1	Yes
Ath_circ_FC1971	exon	AT3G14205	sly_circ_000657	exonic	Solyc07g017430.2	Yes
Ath_circ_FC1977	exon	AT3G14415	sly_circ_000743	exonic	Solyc08g048250.2	Yes
Ath_circ_FC1978	exon	AT3G14415	sly_circ_000743	exonic	Solyc08g048250.2	Yes
Ath_circ_FC1979	exon	AT3G14415	sly_circ_000743	exonic	Solyc08g048250.2	Yes
Ath_circ_FC1980	exon	AT3G14415	sly_circ_000743	exonic	Solyc08g048250.2	Yes
Ath_circ_FC1982	exon	AT3G14420	sly_circ_000743	exonic	Solyc08g048250.2	Yes
Ath_circ_FC1986	exon	AT3G14720	sly_circ_000043	exonic	Solyc01g080240.2	Yes
Ath_circ_FC1987	exon	AT3G14720	sly_circ_000043	exonic	Solyc01g080240.2	Yes
Ath_circ_FC1988	exon	AT3G14720	sly_circ_000043	exonic	Solyc01g080240.2	Yes
Ath_circ_FC2041	exon	AT3G17410	sly_circ_000284	exonic	Solyc12g098820.1	Yes
Ath_circ_FC2042	exon	AT3G17410	sly_circ_000284	exonic	Solyc12g098820.1	Yes
Ath_circ_FC2091	exon	AT3G19980	sly_circ_000036	exonic	Solyc01g073650.2	Yes
Ath_circ_FC2117	exon	AT3G22190	sly_circ_000235	exonic	Solyc11g071840.1	Yes
Ath_circ_FC2121	exon	AT3G22310	sly_circ_000692	exonic	Solyc07g044760.2	Yes
Ath_circ_FC2122	exon	AT3G22330	sly_circ_000692	exonic	Solyc07g044760.2	Yes
Ath_circ_FC2126	exon	AT3G22430	sly_circ_000835	exonic	Solyc09g076040.2	Yes
Ath_circ_FC2145	exon	AT3G23810	sly_circ_000848	exonic	Solyc09g092380.2/Solyc09g092390.2	Yes
Ath_circ_FC2167	exon	AT3G25560	sly_circ_000398	exonic	Solyc03g078520.2	Yes
Ath_circ_FC2207	exon	AT3G28690	sly_circ_000530	exonic	Solyc05g007140.2	Yes
Ath_circ_FC2223	exon	AT3G42640	sly_circ_000678	exonic	Solyc07g022790.2	Yes
Ath_circ_FC2265	exon	AT3G46210	sly_circ_000757	exonic	Solyc08g066700.2	Yes
Ath_circ_FC2275	exon	AT3G46920	sly_circ_000651	exonic	Solyc07g006760.2	Yes
Ath_circ_FC2313	exon	AT3G49430	sly_circ_000399	exonic	Solyc03g082380.2	Yes
Ath_circ_FC2324	exon	AT3G50530	sly_circ_000301	exonic	Solyc02g065070.2	Yes
Ath_circ_FC2339	exon	AT3G51850	sly_circ_000455	exonic	Solyc04g009800.2	Yes
Ath_circ_FC2372	exon	AT3G53860	sly_circ_000588	exonic	Solyc06g010000.2	Yes
Ath_circ_FC2381	exon	AT3G54610	sly_circ_000154	intergenic	NA	Yes
Ath_circ_FC2396	exon	AT3G55450	sly_circ_000530	exonic	Solyc05g007140.2	Yes
Ath_circ_FC2418	exon	AT3G57300	sly_circ_000304	exonic	Solyc02g068560.2	Yes
Ath_circ_FC2420	exon	AT3G57410	sly_circ_000467	exonic	Solyc04g015830.2	Yes
Ath_circ_FC2423	exon	AT3G57530	sly_circ_000455	exonic	Solyc04g009800.2	Yes
Ath_circ_FC2432	exon	AT3G58780	sly_circ_000315	exonic	Solyc02g071730.2	Yes
Ath_circ_FC2468	exon	AT3G61690	sly_circ_000061	exonic	Solyc01g095730.2	Yes
Ath_circ_FC2503	exon	AT4G00180	sly_circ_000653	exonic	Solyc07g008180.2	Yes
Ath_circ_FC2520	exon	AT4G02260	sly_circ_000854	exonic	Solyc09g098580.2	Yes
Ath_circ_FC2532	exon	AT4G03250	sly_circ_000289	exonic	Solyc12g099760.1	Yes
Ath_circ_FC2578	exon	AT4G09960	sly_circ_000315	exonic	Solyc02g071730.2	Yes
Ath_circ_FC2592	exon	AT4G10610	sly_circ_000249	exonic	Solyc12g011340.1	Yes
Ath_circ_FC2599	exon	AT4G11600	sly_circ_000728	exonic	Solyc08g006720.2	Yes
Ath_circ_FC2605	exon	AT4G12020	sly_circ_000544	intronic	Solyc05g012500.2	Yes
Ath_circ_FC2632	exon	AT4G13940	sly_circ_000848	exonic	Solyc09g092380.2/Solyc09g092390.2	Yes
Ath_circ_FC2633	exon	AT4G13940	sly_circ_000848	exonic	Solyc09g092380.2/Solyc09g092390.2	Yes
Ath_circ_FC2638	exon	AT4G14160	sly_circ_000049	exonic	Solyc01g081070.2	Yes
Ath_circ_FC2639	exon	AT4G14160	sly_circ_000049	exonic	Solyc01g081070.2	Yes
Ath_circ_FC2640	exon	AT4G14160	sly_circ_000049	exonic	Solyc01g081070.2	Yes
Ath_circ_FC2642	exon	AT4G14340	sly_circ_000761	exonic	Solyc08g066870.2	Yes
Ath_circ_FC2711	exon	AT4G19520	sly_circ_000823	intronic	Solyc09g056180.2	Yes
Ath_circ_FC2726	exon	AT4G20260	sly_circ_000131	exonic	Solyc10g005100.2	Yes
Ath_circ_FC2729	exon	AT4G20400	sly_circ_000456	exonic	Solyc04g009990.2	Yes
Ath_circ_FC2747	exon	AT4G21750	sly_circ_000374	exonic	Solyc03g031760.2	Yes
Ath_circ_FC2760	exon	AT4G23100	sly_circ_000794	exonic	Solyc08g081010.2	Yes
Ath_circ_FC2768	exon	AT4G23850	sly_circ_000121	exonic	Solyc01g109180.2	Yes
Ath_circ_FC2776	exon	AT4G23980	sly_circ_000431	exonic	Solyc03g118290.2	Yes
Ath_circ_FC2780	exon	AT4G24190	sly_circ_000525	exonic	Solyc04g081570.2	Yes
Ath_circ_FC2781	exon	AT4G24190	sly_circ_000525	exonic	Solyc04g081570.2	Yes
Ath_circ_FC2812	exon	AT4G25720	sly_circ_000368	exonic	Solyc03g007900.2	Yes
Ath_circ_FC2816	exon	AT4G26100	sly_circ_000581	exonic	Solyc06g008320.2	Yes
Ath_circ_FC2817	exon	AT4G26100	sly_circ_000581	exonic	Solyc06g008320.2	Yes
Ath_circ_FC2828	exon	AT4G26940	sly_circ_000764	exonic	Solyc08g069060.2	Yes
Ath_circ_FC2840	exon	AT4G27700	sly_circ_000604	exonic	Solyc06g053140.2	Yes
Ath_circ_FC2841	exon	AT4G27700	sly_circ_000604	exonic	Solyc06g053140.2	Yes
Ath_circ_FC2858	exon	AT4G28470	sly_circ_000704	exonic	Solyc07g053650.2	Yes
Ath_circ_FC2862	exon	AT4G28880	sly_circ_000760	exonic	Solyc08g066870.2	Yes
Ath_circ_FC2863	exon	AT4G28880	sly_circ_000760	exonic	Solyc08g066870.2	Yes
Ath_circ_FC2884	exon	AT4G30520	sly_circ_000398	exonic	Solyc03g078520.2	Yes
Ath_circ_FC2910	exon	AT4G31860	sly_circ_000727	exonic	Solyc08g006060.2	Yes
Ath_circ_FC2914	exon	AT4G32040	sly_circ_000740	exonic	Solyc08g041820.2	Yes
Ath_circ_FC2929	exon	AT4G32551	sly_circ_000612	exonic	Solyc06g065640.2	Yes
Ath_circ_FC2961	exon	AT4G33470	sly_circ_000017	exonic	Solyc01g009120.2	Yes
Ath_circ_FC2962	exon	AT4G33470	sly_circ_000017	exonic	Solyc01g009120.2	Yes
Ath_circ_FC2965	exon	AT4G33650	sly_circ_000214	exonic	Solyc11g043200.1	Yes
Ath_circ_FC2966	exon	AT4G33650	sly_circ_000214	exonic	Solyc11g043200.1	Yes
Ath_circ_FC2979	intron	AT4G34050	sly_circ_000351	exonic	Solyc02g093230.2/Solyc02g093250.2	Yes
Ath_circ_FC2980	exon	AT4G34050	sly_circ_000351	exonic	Solyc02g093230.2/Solyc02g093250.2	Yes
Ath_circ_FC2994	exon	AT4G34480	sly_circ_000523	exonic	Solyc04g080260.2	Yes
Ath_circ_FC2999	exon	AT4G34660	sly_circ_000772	exonic	Solyc08g074780.2	Yes
Ath_circ_FC3001	exon	AT4G34910	sly_circ_000309	exonic	Solyc02g070100.2	Yes
Ath_circ_FC3002	exon	AT4G35000	sly_circ_000126	exonic	Solyc01g111510.2	Yes
Ath_circ_FC3003	exon	AT4G35000	sly_circ_000126	exonic	Solyc01g111510.2	Yes
Ath_circ_FC3015	exon	AT4G35850	sly_circ_000128	exonic	Solyc01g112020.2	Yes
Ath_circ_FC3051	exon	AT4G38230	sly_circ_000455	exonic	Solyc04g009800.2	Yes
Ath_circ_FC3055	exon	AT4G38470	sly_circ_000352	exonic	Solyc02g093410.2	Yes
Ath_circ_FC3085	exon	AT4G39980	sly_circ_000503	exonic	Solyc04g074480.2	Yes
Ath_circ_FC3086	exon	AT4G39980	sly_circ_000503	exonic	Solyc04g074480.2	Yes
Ath_circ_FC3087	exon	AT4G39980	sly_circ_000503	exonic	Solyc04g074480.2	Yes
Ath_circ_FC3090	exon	AT5G01020	sly_circ_000530	exonic	Solyc05g007140.2	Yes
Ath_circ_FC3091	exon	AT5G01020	sly_circ_000577	exonic	Solyc06g005500.2	Yes
Ath_circ_FC3108	exon	AT5G02290	sly_circ_000577	exonic	Solyc06g005500.2	Yes
Ath_circ_FC3137	exon	AT5G03730	sly_circ_000183	exonic	Solyc10g085570.1	Yes
Ath_circ_FC3138	exon	AT5G03730	sly_circ_000183	exonic	Solyc10g085570.1	Yes
Ath_circ_FC3139	exon	AT5G03730	sly_circ_000183	exonic	Solyc10g085570.1	Yes
Ath_circ_FC3140	exon	AT5G03730	sly_circ_000183	exonic	Solyc10g085570.1	Yes
Ath_circ_FC3144	exon	AT5G04250	sly_circ_000797	exonic	Solyc09g008020.2	Yes
Ath_circ_FC3145	exon	AT5G04410	sly_circ_000572	exonic	Solyc05g055470.2	Yes
Ath_circ_FC3157	exon	AT5G04870	sly_circ_000455	exonic	Solyc04g009800.2	Yes
Ath_circ_FC3195	exon	AT5G07350	sly_circ_000429	exonic	Solyc03g118010.2/Solyc03g118020.2	Yes
Ath_circ_FC3258	exon	AT5G12480	sly_circ_000164	exonic	Solyc10g079130.1	Yes
Ath_circ_FC3264	exon	AT5G13000	sly_circ_000007	exonic	Solyc01g006370.2	Yes
Ath_circ_FC3265	exon	AT5G13000	sly_circ_000007	exonic	Solyc01g006370.2	Yes
Ath_circ_FC3301	exon	AT5G14590	sly_circ_000004	exonic	Solyc01g005560.2	Yes
Ath_circ_FC3302	exon	AT5G14640	sly_circ_000343	exonic	Solyc02g086670.2	Yes
Ath_circ_FC3338	exon	AT5G16570	sly_circ_000044	exonic	Solyc01g080280.2	Yes
Ath_circ_FC3346	exon	AT5G17020	sly_circ_000409	exonic	Solyc03g096920.2	Yes
Ath_circ_FC3376	exon	AT5G18620	sly_circ_000032	exonic	Solyc01g067390.2	Yes
Ath_circ_FC3385	exon	AT5G19010	sly_circ_000043	exonic	Solyc01g080240.2	Yes
Ath_circ_FC3386	exon	AT5G19010	sly_circ_000043	exonic	Solyc01g080240.2	Yes
Ath_circ_FC3389	exon	AT5G19150	sly_circ_000041	exonic	Solyc01g079880.2	Yes
Ath_circ_FC3399	exon	AT5G19390	sly_circ_000505	exonic	Solyc04g076140.2	Yes
Ath_circ_FC3402	exon	AT5G19400	sly_circ_000169	exonic	Solyc10g080740.1	Yes
Ath_circ_FC3419	exon	AT5G19820	sly_circ_000029	exonic	Solyc01g044360.2	Yes
Ath_circ_FC3420	exon	AT5G19820	sly_circ_000029	exonic	Solyc01g044360.2	Yes
Ath_circ_FC3424	Intergenic	n/a	sly_circ_000107	exonic	Solyc01g104680.2/Solyc01g104700.2	Yes
Ath_circ_FC3441	exon	AT5G21090	sly_circ_000173	exonic	Solyc10g081190.1	Yes
Ath_circ_FC3444	exon	AT5G21222	sly_circ_000016	exonic	Solyc01g008850.2	Yes
Ath_circ_FC3478	exon	AT5G23580	sly_circ_000455	exonic	Solyc04g009800.2	Yes
Ath_circ_FC3479	exon	AT5G23580	sly_circ_000455	exonic	Solyc04g009800.2	Yes
Ath_circ_FC3485	exon	AT5G23880	sly_circ_000372	exonic	Solyc03g025540.2	Yes
Ath_circ_FC3493	exon	AT5G24450	sly_circ_000248	exonic	Solyc12g011180.1	Yes
Ath_circ_FC3498	exon	AT5G24590	sly_circ_000572	exonic	Solyc05g055470.2	Yes
Ath_circ_FC3534	exon	AT5G26751	sly_circ_000091	exonic	Solyc01g101000.2	Yes
Ath_circ_FC3535	exon	AT5G26780	sly_circ_000510	exonic	Solyc04g076790.2	Yes
Ath_circ_FC3571	exon	AT5G35570	sly_circ_000683	exonic	Solyc07g041750.2	Yes
Ath_circ_FC3573	exon	AT5G35630	sly_circ_000044	exonic	Solyc01g080280.2	Yes
Ath_circ_FC3575	exon	AT5G35700	sly_circ_000718	exonic	Solyc07g065080.2	Yes
Ath_circ_FC3576	exon	AT5G35730	sly_circ_000679	exonic	Solyc07g022830.2	Yes
Ath_circ_FC3577	exon	AT5G35730	sly_circ_000679	exonic	Solyc07g022830.2	Yes
Ath_circ_FC3624	exon	AT5G41260	sly_circ_000225	exonic	Solyc11g064890.1	Yes
Ath_circ_FC3629	exon	AT5G42020	sly_circ_000461	exonic	Solyc04g011440.2	Yes
Ath_circ_FC3631	exon	AT5G42080	sly_circ_000062	exonic	Solyc01g095970.2	Yes
Ath_circ_FC3632	exon	AT5G42080	sly_circ_000062	exonic	Solyc01g095970.2	Yes
Ath_circ_FC3633	exon	AT5G42080	sly_circ_000062	exonic	Solyc01g095970.2	Yes
Ath_circ_FC3662	exon	AT5G43930	sly_circ_000843	exonic	Solyc09g091020.2	Yes
Ath_circ_FC3663	exon	AT5G43930	sly_circ_000843	exonic	Solyc09g091020.2	Yes
Ath_circ_FC3734	exon	AT5G49720	sly_circ_000092	exonic	Solyc01g102570.2/Solyc01g102600.2	Yes
Ath_circ_FC3745	exon	AT5G50920	sly_circ_000432	exonic	Solyc03g118340.2	Yes
Ath_circ_FC3756	exon	AT5G51340	sly_circ_000818	exonic	Solyc09g055340.2	Yes
Ath_circ_FC3780	exon	AT5G53170	sly_circ_000746	exonic	Solyc08g063050.2	Yes
Ath_circ_FC3784	exon	AT5G53450	sly_circ_000401	exonic	Solyc03g083420.2	Yes
Ath_circ_FC3816	exon	AT5G55550	sly_circ_000698	exonic	Solyc07g048030.2	Yes
Ath_circ_FC3817	intron	AT5G55670	sly_circ_000720	exonic	Solyc07g065510.2/Solyc07g065520.2	Yes
Ath_circ_FC3830	exon	AT5G56720	sly_circ_000837	exonic	Solyc09g090140.2	Yes
Ath_circ_FC3833	exon	AT5G57015	sly_circ_000581	exonic	Solyc06g008320.2	Yes
Ath_circ_FC3837	exon	AT5G57160	sly_circ_000659	exonic	Solyc07g017990.2	Yes
Ath_circ_FC3843	exon	AT5G57870	sly_circ_000646	exonic	Solyc07g005810.2	Yes
Ath_circ_FC3848	Intergenic	n/a	sly_circ_000645	exonic	Solyc07g005480.2	Yes
Ath_circ_FC3851	exon	AT5G58290	sly_circ_000125	exonic	Solyc01g109940.2	Yes
Ath_circ_FC3852	exon	AT5G58330	sly_circ_000187	exonic	Solyc11g007990.1	Yes
Ath_circ_FC3857	exon	AT5G58970	sly_circ_000817	exonic	Solyc09g031680.1	Yes
Ath_circ_FC3860	exon	AT5G59290	sly_circ_000459	exonic	Solyc04g011400.2	Yes
Ath_circ_FC3863	exon	AT5G59420	sly_circ_000181	exonic	Solyc10g084800.1	Yes
Ath_circ_FC3871	exon	AT5G60390	sly_circ_000231	intergenic	NA	Yes
Ath_circ_FC3891	exon	AT5G61410	sly_circ_000424	exonic	Solyc03g115820.2	Yes
Ath_circ_FC3892	exon	AT5G61410	sly_circ_000424	exonic	Solyc03g115820.2	Yes
Ath_circ_FC3893	exon	AT5G61410	sly_circ_000424	exonic	Solyc03g115820.2	Yes
Ath_circ_FC3895	exon	AT5G61530	sly_circ_000398	exonic	Solyc03g078520.2	Yes
Ath_circ_FC3897	exon	AT5G61780	sly_circ_000429	exonic	Solyc03g118010.2/Solyc03g118020.2	Yes
Ath_circ_FC3904	exon	AT5G62000	sly_circ_000430	exonic	Solyc03g118290.2	Yes
Ath_circ_FC3905	exon	AT5G62090	sly_circ_000612	exonic	Solyc06g065640.2	Yes
Ath_circ_FC3907	exon	AT5G62165	sly_circ_000315	exonic	Solyc02g071730.2	Yes
Ath_circ_FC3908	exon	AT5G62165	sly_circ_000315	exonic	Solyc02g071730.2	Yes
Ath_circ_FC3914	exon	AT5G62890	sly_circ_000421	exonic	Solyc03g114030.2	Yes
Ath_circ_FC3915	exon	AT5G62890	sly_circ_000421	exonic	Solyc03g114030.2	Yes
Ath_circ_FC3918	exon	AT5G63160	sly_circ_000625	exonic	Solyc06g071820.2	Yes
Ath_circ_FC3928	exon	AT5G63860	sly_circ_000552	exonic	Solyc05g018620.2/Solyc05g018630.1	Yes
Ath_circ_FC3929	exon	AT5G63860	sly_circ_000552	exonic	Solyc05g018620.2/Solyc05g018630.1	Yes
Ath_circ_FC3980	exon	AT5G66640	sly_circ_000381	exonic	Solyc03g044100.2	Yes
Ath_circ_FC4001	Intergenic	n/a	sly_circ_000160	intergenic	NA	Yes
Ath_circ_FC4002	Intergenic	n/a	sly_circ_000160	intergenic	NA	Yes
Ath_circ_FC4003	Intergenic	n/a	sly_circ_000160	intergenic	NA	Yes
Ath_circ_FC4004	Intergenic	n/a	sly_circ_000160	intergenic	NA	Yes
Ath_circ_FC4005	Intergenic	n/a	sly_circ_000160	intergenic	NA	Yes
Ath_circ_FC4055	Intergenic	n/a	sly_circ_000518	exonic	Solyc04g079320.2	Yes
Ath_circ_FC4069	Intergenic	n/a	sly_circ_000518	exonic	Solyc04g079320.2	Yes
Ath_circ_FC4099	Intergenic	n/a	sly_circ_000518	exonic	Solyc04g079320.2	Yes
Ath_circ_FC4100	Intergenic	n/a	sly_circ_000518	exonic	Solyc04g079320.2	Yes
Ath_circ_FC4112	Intergenic	n/a	sly_circ_000518	exonic	Solyc04g079320.2	Yes
Ath_circ_FC4113	Intergenic	n/a	sly_circ_000518	exonic	Solyc04g079320.2	Yes
Ath_circ_FC4114	Intergenic	n/a	sly_circ_000518	exonic	Solyc04g079320.2	Yes
Ath_circ_FC4159	Intergenic	n/a	sly_circ_000518	exonic	Solyc04g079320.2	Yes
Ath_circ_FC4160	Intergenic	n/a	sly_circ_000518	exonic	Solyc04g079320.2	Yes
Ath_circ_FC4161	Intergenic	n/a	sly_circ_000518	exonic	Solyc04g079320.2	Yes
Ath_circ_FC4162	Intergenic	n/a	sly_circ_000518	exonic	Solyc04g079320.2	Yes
Ath_circ_FC4163	Intergenic	n/a	sly_circ_000518	exonic	Solyc04g079320.2	Yes
Ath_circ_FC4164	Intergenic	n/a	sly_circ_000518	exonic	Solyc04g079320.2	Yes
Ath_circ_FC4168	Intergenic	n/a	sly_circ_000518	exonic	Solyc04g079320.2	Yes
Ath_circ_FC4169	Intergenic	n/a	sly_circ_000518	exonic	Solyc04g079320.2	Yes
Ath_circ_FC4170	Intergenic	n/a	sly_circ_000518	exonic	Solyc04g079320.2	Yes
Ath_circ_FC4185	Intergenic	n/a	sly_circ_000518	exonic	Solyc04g079320.2	Yes
Ath_circ_FC4192	Intergenic	n/a	sly_circ_000518	exonic	Solyc04g079320.2	Yes
Ath_circ_FC4216	Intergenic	n/a	sly_circ_000518	exonic	Solyc04g079320.2	Yes
Ath_circ_FC4217	Intergenic	n/a	sly_circ_000518	exonic	Solyc04g079320.2	Yes
Ath_circ_FC4225	Intergenic	n/a	sly_circ_000518	exonic	Solyc04g079320.2	Yes
Ath_circ_FC4226	Intergenic	n/a	sly_circ_000518	exonic	Solyc04g079320.2	Yes
Ath_circ_FC4235	Intergenic	n/a	sly_circ_000518	exonic	Solyc04g079320.2	Yes
Ath_circ_FC4236	Intergenic	n/a	sly_circ_000518	exonic	Solyc04g079320.2	Yes
Ath_circ_FC4242	Intergenic	n/a	sly_circ_000518	exonic	Solyc04g079320.2	Yes
Ath_circ_FC4251	Intergenic	n/a	sly_circ_000518	exonic	Solyc04g079320.2	Yes
Ath_circ_FC4252	Intergenic	n/a	sly_circ_000518	exonic	Solyc04g079320.2	Yes
Ath_circ_FC4261	Intergenic	n/a	sly_circ_000518	exonic	Solyc04g079320.2	Yes
Ath_circ_FC4278	Intergenic	n/a	sly_circ_000518	exonic	Solyc04g079320.2	Yes
Ath_circ_FC4279	Intergenic	n/a	sly_circ_000518	exonic	Solyc04g079320.2	Yes
Ath_circ_FC4282	Intergenic	n/a	sly_circ_000518	exonic	Solyc04g079320.2	Yes
Ath_circ_FC4283	Intergenic	n/a	sly_circ_000518	exonic	Solyc04g079320.2	Yes
Ath_circ_FC4292	Intergenic	n/a	sly_circ_000518	exonic	Solyc04g079320.2	Yes
Ath_circ_FC4298	Intergenic	n/a	sly_circ_000518	exonic	Solyc04g079320.2	Yes
Ath_circ_FC4299	Intergenic	n/a	sly_circ_000518	exonic	Solyc04g079320.2	Yes
Ath_circ_FC4302	Intergenic	n/a	sly_circ_000518	exonic	Solyc04g079320.2	Yes
Ath_circ_FC4303	Intergenic	n/a	sly_circ_000518	exonic	Solyc04g079320.2	Yes
Ath_circ_FC4317	Intergenic	n/a	sly_circ_000518	exonic	Solyc04g079320.2	Yes
Ath_circ_FC4320	Intergenic	n/a	sly_circ_000518	exonic	Solyc04g079320.2	Yes
Ath_circ_FC4321	Intergenic	n/a	sly_circ_000518	exonic	Solyc04g079320.2	Yes
Ath_circ_FC4323	Intergenic	n/a	sly_circ_000518	exonic	Solyc04g079320.2	Yes
Ath_circ_FC4331	Intergenic	n/a	sly_circ_000518	exonic	Solyc04g079320.2	Yes
Ath_circ_FC4336	Intergenic	n/a	sly_circ_000518	exonic	Solyc04g079320.2	Yes
Ath_circ_FC4337	Intergenic	n/a	sly_circ_000518	exonic	Solyc04g079320.2	Yes
Ath_circ_FC4338	Intergenic	n/a	sly_circ_000518	exonic	Solyc04g079320.2	Yes
Ath_circ_FC4340	Intergenic	n/a	sly_circ_000518	exonic	Solyc04g079320.2	Yes
Ath_circ_FC4341	Intergenic	n/a	sly_circ_000518	exonic	Solyc04g079320.2	Yes
Ath_circ_FC4352	Intergenic	n/a	sly_circ_000672	intergenic	NA	Yes
Ath_circ_FC4353	Intergenic	n/a	sly_circ_000518	exonic	Solyc04g079320.2	Yes
Ath_circ_FC4354	Intergenic	n/a	sly_circ_000518	exonic	Solyc04g079320.2	Yes
Ath_circ_FC4355	Intergenic	n/a	sly_circ_000518	exonic	Solyc04g079320.2	Yes
Ath_circ_FC4356	Intergenic	n/a	sly_circ_000518	exonic	Solyc04g079320.2	Yes
Ath_circ_FC4357	Intergenic	n/a	sly_circ_000518	exonic	Solyc04g079320.2	Yes
Ath_circ_FC4363	Intergenic	n/a	sly_circ_000518	exonic	Solyc04g079320.2	Yes
Ath_circ_FC4364	Intergenic	n/a	sly_circ_000518	exonic	Solyc04g079320.2	Yes
Ath_circ_FC4365	Intergenic	n/a	sly_circ_000518	exonic	Solyc04g079320.2	Yes
Ath_circ_FC4372	Intergenic	n/a	sly_circ_000518	exonic	Solyc04g079320.2	Yes
Ath_circ_FC4374	Intergenic	n/a	sly_circ_000518	exonic	Solyc04g079320.2	Yes
Ath_circ_FC4376	Intergenic	n/a	sly_circ_000518	exonic	Solyc04g079320.2	Yes
Ath_circ_FC4385	Intergenic	n/a	sly_circ_000518	exonic	Solyc04g079320.2	Yes
Ath_circ_FC4403	Intergenic	n/a	sly_circ_000518	exonic	Solyc04g079320.2	Yes
Ath_circ_FC4406	Intergenic	n/a	sly_circ_000518	exonic	Solyc04g079320.2	Yes
Ath_circ_FC4408	Intergenic	n/a	sly_circ_000518	exonic	Solyc04g079320.2	Yes
Ath_circ_FC4416	Intergenic	n/a	sly_circ_000518	exonic	Solyc04g079320.2	Yes
Ath_circ_FC4423	Intergenic	n/a	sly_circ_000518	exonic	Solyc04g079320.2	Yes
Ath_circ_FC4426	Intergenic	n/a	sly_circ_000518	exonic	Solyc04g079320.2	Yes
Ath_circ_FC4429	Intergenic	n/a	sly_circ_000518	exonic	Solyc04g079320.2	Yes
Ath_circ_FC4434	Intergenic	n/a	sly_circ_000518	exonic	Solyc04g079320.2	Yes
Ath_circ_FC4435	Intergenic	n/a	sly_circ_000518	exonic	Solyc04g079320.2	Yes
Ath_circ_FC4436	Intergenic	n/a	sly_circ_000518	exonic	Solyc04g079320.2	Yes
Ath_circ_FC4441	Intergenic	n/a	sly_circ_000518	exonic	Solyc04g079320.2	Yes
Ath_circ_FC4453	Intergenic	n/a	sly_circ_000518	exonic	Solyc04g079320.2	Yes
Ath_circ_FC4467	Intergenic	n/a	sly_circ_000725	exonic	Solyc08g005290.2	Yes
Ath_circ_FC4472	Intergenic	n/a	sly_circ_000518	exonic	Solyc04g079320.2	Yes
Ath_circ_FC4474	Intergenic	n/a	sly_circ_000518	exonic	Solyc04g079320.2	Yes
Ath_circ_FC4475	Intergenic	n/a	sly_circ_000518	exonic	Solyc04g079320.2	Yes
Ath_circ_FC4477	Intergenic	n/a	sly_circ_000725	exonic	Solyc08g005290.2	Yes
Ath_circ_FC4478	Intergenic	n/a	sly_circ_000518	exonic	Solyc04g079320.2	Yes
Ath_circ_FC4502	Intergenic	n/a	sly_circ_000518	exonic	Solyc04g079320.2	Yes
Ath_circ_FC4505	Intergenic	n/a	sly_circ_000518	exonic	Solyc04g079320.2	Yes
Ath_circ_FC4510	Intergenic	n/a	sly_circ_000518	exonic	Solyc04g079320.2	Yes
Ath_circ_FC4518	Intergenic	n/a	sly_circ_000518	exonic	Solyc04g079320.2	Yes
Ath_circ_FC4522	Intergenic	n/a	sly_circ_000518	exonic	Solyc04g079320.2	Yes
Ath_circ_FC4523	Intergenic	n/a	sly_circ_000518	exonic	Solyc04g079320.2	Yes
Ath_circ_FC4524	Intergenic	n/a	sly_circ_000518	exonic	Solyc04g079320.2	Yes
Ath_circ_FC4530	Intergenic	n/a	sly_circ_000518	exonic	Solyc04g079320.2	Yes
Ath_circ_FC4539	Intergenic	n/a	sly_circ_000518	exonic	Solyc04g079320.2	Yes
Ath_circ_FC4544	Intergenic	n/a	sly_circ_000518	exonic	Solyc04g079320.2	Yes
Ath_circ_FC4547	Intergenic	n/a	sly_circ_000518	exonic	Solyc04g079320.2	Yes
Ath_circ_FC4549	Intergenic	n/a	sly_circ_000518	exonic	Solyc04g079320.2	Yes
Ath_circ_FC4550	Intergenic	n/a	sly_circ_000518	exonic	Solyc04g079320.2	Yes
Ath_circ_FC4556	Intergenic	n/a	sly_circ_000518	exonic	Solyc04g079320.2	Yes
Ath_circ_FC4559	Intergenic	n/a	sly_circ_000518	exonic	Solyc04g079320.2	Yes
Ath_circ_FC4564	Intergenic	n/a	sly_circ_000518	exonic	Solyc04g079320.2	Yes
Ath_circ_FC4566	Intergenic	n/a	sly_circ_000518	exonic	Solyc04g079320.2	Yes
Ath_circ_FC4567	Intergenic	n/a	sly_circ_000518	exonic	Solyc04g079320.2	Yes
Ath_circ_FC4569	Intergenic	n/a	sly_circ_000518	exonic	Solyc04g079320.2	Yes
Ath_circ_FC4570	Intergenic	n/a	sly_circ_000518	exonic	Solyc04g079320.2	Yes
Ath_circ_FC4571	Intergenic	n/a	sly_circ_000518	exonic	Solyc04g079320.2	Yes
Ath_circ_FC4572	Intergenic	n/a	sly_circ_000518	exonic	Solyc04g079320.2	Yes
Ath_circ_FC4573	Intergenic	n/a	sly_circ_000518	exonic	Solyc04g079320.2	Yes
Ath_circ_FC4574	Intergenic	n/a	sly_circ_000518	exonic	Solyc04g079320.2	Yes
Ath_circ_FC4575	Intergenic	n/a	sly_circ_000518	exonic	Solyc04g079320.2	Yes
Ath_circ_FC4577	Intergenic	n/a	sly_circ_000518	exonic	Solyc04g079320.2	Yes
Ath_circ_FC4578	Intergenic	n/a	sly_circ_000518	exonic	Solyc04g079320.2	Yes
Ath_circ_FC4580	Intergenic	n/a	sly_circ_000518	exonic	Solyc04g079320.2	Yes
Ath_circ_FC4581	Intergenic	n/a	sly_circ_000518	exonic	Solyc04g079320.2	Yes
Ath_circ_FC4582	Intergenic	n/a	sly_circ_000518	exonic	Solyc04g079320.2	Yes
Ath_circ_FC4583	Intergenic	n/a	sly_circ_000518	exonic	Solyc04g079320.2	Yes
Ath_circ_FC4586	Intergenic	n/a	sly_circ_000518	exonic	Solyc04g079320.2	Yes
Ath_circ_FC4587	Intergenic	n/a	sly_circ_000518	exonic	Solyc04g079320.2	Yes
Ath_circ_FC4588	Intergenic	n/a	sly_circ_000518	exonic	Solyc04g079320.2	Yes
Ath_circ_FC4590	Intergenic	n/a	sly_circ_000518	exonic	Solyc04g079320.2	Yes
Ath_circ_FC4593	Intergenic	n/a	sly_circ_000518	exonic	Solyc04g079320.2	Yes
Ath_circ_FC4595	Intergenic	n/a	sly_circ_000518	exonic	Solyc04g079320.2	Yes
Ath_circ_FC4599	Intergenic	n/a	sly_circ_000518	exonic	Solyc04g079320.2	Yes
Ath_circ_FC4600	Intergenic	n/a	sly_circ_000518	exonic	Solyc04g079320.2	Yes
Ath_circ_FC4601	Intergenic	n/a	sly_circ_000518	exonic	Solyc04g079320.2	Yes
Ath_circ_FC4606	Intergenic	n/a	sly_circ_000363	exonic	Solyc03g005430.2	Yes
Ath_circ_FC4608	Intergenic	n/a	sly_circ_000363	exonic	Solyc03g005430.2	Yes
Ath_circ_FC4616	Intergenic	n/a	sly_circ_000363	exonic	Solyc03g005430.2	Yes
Ath_circ_FC4627	Intergenic	n/a	sly_circ_000363	exonic	Solyc03g005430.2	Yes
Ath_circ_FC4629	Intergenic	n/a	sly_circ_000472	exonic	Solyc04g025160.2	Yes
Ath_circ_FC4636	Intergenic	n/a	sly_circ_000472	exonic	Solyc04g025160.2	Yes
Ath_circ_FC4639	Intergenic	n/a	sly_circ_000472	exonic	Solyc04g025160.2	Yes
Ath_circ_FC4657	Intergenic	n/a	sly_circ_000472	exonic	Solyc04g025160.2	Yes
Ath_circ_FC4662	Intergenic	n/a	sly_circ_000472	exonic	Solyc04g025160.2	Yes
Ath_circ_FC4663	Intergenic	n/a	sly_circ_000454	exonic	Solyc04g008700.2	Yes
Ath_circ_FC4668	Intergenic	n/a	sly_circ_000472	exonic	Solyc04g025160.2	Yes
Ath_circ_FC4676	Intergenic	n/a	sly_circ_000472	exonic	Solyc04g025160.2	Yes
Ath_circ_FC4682	Intergenic	n/a	sly_circ_000472	exonic	Solyc04g025160.2	Yes
Ath_circ_FC4686	Intergenic	n/a	sly_circ_000472	exonic	Solyc04g025160.2	Yes
Ath_circ_FC4692	Intergenic	n/a	sly_circ_000472	exonic	Solyc04g025160.2	Yes
Ath_circ_FC4694	Intergenic	n/a	sly_circ_000472	exonic	Solyc04g025160.2	Yes
Ath_circ_FC4696	Intergenic	n/a	sly_circ_000472	exonic	Solyc04g025160.2	Yes
Ath_circ_FC4697	Intergenic	n/a	sly_circ_000472	exonic	Solyc04g025160.2	Yes
Ath_circ_FC4705	Intergenic	n/a	sly_circ_000472	exonic	Solyc04g025160.2	Yes
Ath_circ_FC4707	Intergenic	n/a	sly_circ_000472	exonic	Solyc04g025160.2	Yes
Ath_circ_FC4715	Intergenic	n/a	sly_circ_000472	exonic	Solyc04g025160.2	Yes
Ath_circ_FC4783	exon	ATCG00550	sly_circ_000454	exonic	Solyc04g008700.2	Yes
Ath_circ_FC4834	exon	ATCG00750	sly_circ_000454	exonic	Solyc04g008700.2	Yes
Ath_circ_FC4836	exon	AT1G32930	sly_circ_000764	exonic	Solyc08g069060.2	Yes
Ath_circ_FC4850	exon	AT2G34710	sly_circ_000754	exonic	Solyc08g066500.2	Yes
Ath_circ_FC4874	Intergenic	-	sly_circ_000160	intergenic	NA	Yes
Ath_circ_FC4881	exon	AT1G56070	sly_circ_000745	exonic	Solyc08g062910.2/Solyc08g062920.2	Yes
Ath_circ_FC4899	exon	ATCG00020	sly_circ_000518	exonic	Solyc04g079320.2	Yes
Ath_circ_FC4903	exon	AT1G32790	sly_circ_000249	exonic	Solyc12g011340.1	Yes
Ath_circ_FC4940	exon	AT2G30980	sly_circ_000091	exonic	Solyc01g101000.2	Yes
Ath_circ_FC4982	exon	AT1G76970	sly_circ_000497	exonic	Solyc04g063280.2	Yes
Ath_circ_FC5021	exon	AT1G56070	sly_circ_000745	exonic	Solyc08g062910.2/Solyc08g062920.2	Yes
Ath_circ_FC5028	exon	AT1G70650	sly_circ_000014	exonic	Solyc01g007860.2	Yes
Ath_circ_FC5060	exon	AT3G14720	sly_circ_000043	exonic	Solyc01g080240.2	Yes
Ath_circ_FC5081	exon	AT4G30210	sly_circ_000675	exonic	Solyc07g019460.2	Yes
Ath_circ_FC5099	exon	AT5G53450	sly_circ_000401	exonic	Solyc03g083420.2	Yes
Ath_circ_FC5103	exon	AT5G61780	sly_circ_000429	exonic	Solyc03g118010.2/Solyc03g118020.2	Yes
Ath_circ_FC5112	exon	ATCG00020	sly_circ_000518	exonic	Solyc04g079320.2	Yes
Ath_circ_FC5176	exon	AT5G07350	sly_circ_000429	exonic	Solyc03g118010.2/Solyc03g118020.2	Yes
Ath_circ_FC5187	exon	ATMG00030	sly_circ_000160	intergenic	NA	Yes
Ath_circ_FC5190	exon	ATCG00020	sly_circ_000518	exonic	Solyc04g079320.2	Yes
Ath_circ_FC5191	exon	ATCG00020	sly_circ_000518	exonic	Solyc04g079320.2	Yes
Ath_circ_FC5196	exon	ATCG00120	sly_circ_000725	exonic	Solyc08g005290.2	Yes
Ath_circ_FC5197	exon	ATCG00320	sly_circ_000454	exonic	Solyc04g008700.2	Yes
Ath_circ_FC5201	exon	ATCG00550	sly_circ_000454	exonic	Solyc04g008700.2	Yes
Ath_circ_FC5213	exon	AT1G04410	sly_circ_000837	exonic	Solyc09g090140.2	Yes
Ath_circ_FC5222	exon	AT1G19850	sly_circ_000375	exonic	Solyc03g031970.2	Yes
Ath_circ_FC5224	exon	AT1G20760	sly_circ_000329	exonic	Solyc02g082540.2	Yes
Ath_circ_FC5231	exon	AT1G50700	sly_circ_000455	exonic	Solyc04g009800.2	Yes
Ath_circ_FC5248	exon	AT1G78200	sly_circ_000111	exonic	Solyc01g105280.2	Yes
Ath_circ_FC5284	exon	AT3G07370	sly_circ_000636	exonic	Solyc06g083150.2	Yes
Ath_circ_FC5292	exon	AT3G17820	sly_circ_000044	exonic	Solyc01g080280.2	Yes
Ath_circ_FC5321	exon	AT4G13940	sly_circ_000848	exonic	Solyc09g092380.2/Solyc09g092390.2	Yes
Ath_circ_FC5324	exon	AT4G26940	sly_circ_000764	exonic	Solyc08g069060.2	Yes
Ath_circ_FC5389	Intergenic	-	sly_circ_000160	intergenic	NA	Yes
Ath_circ_FC5396	exon	ATCG00020	sly_circ_000518	exonic	Solyc04g079320.2	Yes
Ath_circ_FC5397	exon	ATCG00020	sly_circ_000518	exonic	Solyc04g079320.2	Yes
Ath_circ_FC5405	exon	ATCG00310	sly_circ_000454	exonic	Solyc04g008700.2	Yes
Ath_circ_FC5413	exon	ATCG00550	sly_circ_000454	exonic	Solyc04g008700.2	Yes
Ath_circ_FC5441	exon	AT1G56070	sly_circ_000745	exonic	Solyc08g062910.2/Solyc08g062920.2	Yes
Ath_circ_FC5443	exon	AT1G68410	sly_circ_000517	exonic	Solyc04g079120.2	Yes
Ath_circ_FC5448	exon	AT1G79570	sly_circ_000651	exonic	Solyc07g006760.2	Yes
Ath_circ_FC5461	exon	AT2G30390	sly_circ_000553	exonic	Solyc05g018650.2	Yes
Ath_circ_FC5509	exon	AT5G60390	sly_circ_000231	intergenic	NA	Yes
Ath_circ_FC5516	exon	ATCG00020	sly_circ_000518	exonic	Solyc04g079320.2	Yes
Ath_circ_FC5517	exon	ATCG00020	sly_circ_000518	exonic	Solyc04g079320.2	Yes
Ath_circ_FC5533	exon	ATCG00340	sly_circ_000454	exonic	Solyc04g008700.2	Yes
Ath_circ_FC5534	exon	ATCG00490	sly_circ_000454	exonic	Solyc04g008700.2	Yes
Ath_circ_FC5541	exon	ATCG00730	sly_circ_000454	exonic	Solyc04g008700.2	Yes
Ath_circ_FC5557	exon	AT1G16300	sly_circ_000628	exonic	Solyc06g071920.2	Yes
Ath_circ_FC5567	exon	AT1G25490	sly_circ_000621	exonic	Solyc06g069180.2	Yes
Ath_circ_FC5576	exon	AT1G32790	sly_circ_000249	exonic	Solyc12g011340.1	Yes
Ath_circ_FC5627	exon	AT2G31370	sly_circ_000605	exonic	Solyc06g053350.2	Yes
Ath_circ_FC5684	exon	AT3G27150	sly_circ_000049	exonic	Solyc01g081070.2	Yes
Ath_circ_FC5694	exon	AT3G50210	sly_circ_000495	exonic	Solyc04g058000.1/Solyc04g058040.1	Yes
Ath_circ_FC5717	exon	AT4G13930	sly_circ_000510	exonic	Solyc04g076790.2	Yes
Ath_circ_FC5791	exon	AT5G49720	sly_circ_000092	exonic	Solyc01g102570.2/Solyc01g102600.2	Yes
Ath_circ_FC5802	exon	AT5G59210	sly_circ_000822	exonic	Solyc09g055760.2	Yes
Ath_circ_FC5836	exon	ATCG00020	sly_circ_000518	exonic	Solyc04g079320.2	Yes
Ath_circ_FC5837	exon	ATCG00020	sly_circ_000518	exonic	Solyc04g079320.2	Yes
Ath_circ_FC5843	exon	ATCG00290	sly_circ_000454	exonic	Solyc04g008700.2	Yes
Ath_circ_FC5849	exon	ATCG00490	sly_circ_000454	exonic	Solyc04g008700.2	Yes
Ath_circ_FC5854	exon	ATCG00640	sly_circ_000454	exonic	Solyc04g008700.2	Yes
Ath_circ_FC5856	exon	ATCG00670	sly_circ_000454	exonic	Solyc04g008700.2	Yes

## Sheet: Z. mays
Z. mays
#CircRNAs	circRNA_type	Parent genes	CircRNAs	circRNA_type	Parent genes	Sequence similarity for circRNAs
Ath_circ_FC0043	exon	AT2G42600	zma_circ_000463	exonic	GRMZM2G083841	Yes
Ath_circ_FC0554	exon	AT1G29930	zma_circ_000391	exonic	AC207722.2_FG009	Yes
Ath_circ_FC0666	exon	AT1G47128	zma_circ_000341	exonic	GRMZM2G150256/GRMZM2G150276	Yes
Ath_circ_FC0914	exon	AT1G68290	zma_circ_000432	exonic	GRMZM2G083016	Yes
Ath_circ_FC1003	exon	AT1G74470	zma_circ_000318	exonic	GRMZM2G105644	Yes
Ath_circ_FC1119	exon	AT2G01140	zma_circ_000085	exonic	GRMZM2G046284	Yes
Ath_circ_FC1294	exon	AT2G21660	zma_circ_000038	exonic	GRMZM2G080603	Yes
Ath_circ_FC1487	exon	AT2G34420	zma_circ_000390	exonic	AC207722.2_FG009	Yes
Ath_circ_FC1508	exon	AT2G35635	zma_circ_000264	exonic	GRMZM2G118637/GRMZM2G419844	Yes
Ath_circ_FC1520	exon	AT2G36070	zma_circ_000264	exonic	GRMZM2G118637/GRMZM2G419844	Yes
Ath_circ_FC1533	exon	AT2G36880	zma_circ_000121	exonic	GRMZM2G061135	Yes
Ath_circ_FC1644	exon	AT2G42600	zma_circ_000468	exonic	GRMZM2G083841	Yes
Ath_circ_FC1645	exon	AT2G42600	zma_circ_000465	exonic	GRMZM2G083841	Yes
Ath_circ_FC1646	exon	AT2G42600	zma_circ_000463	exonic	GRMZM2G083841	Yes
Ath_circ_FC1779	exon	AT3G02450	zma_circ_000482	exonic	GRMZM2G110408	Yes
Ath_circ_FC1780	exon	AT3G02450	zma_circ_000482	exonic	GRMZM2G110408	Yes
Ath_circ_FC1841	exon	AT3G06483	zma_circ_000410	exonic	AC217975.3_FG001	Yes
Ath_circ_FC1868	exon	AT3G08690	zma_circ_000140	exonic	GRMZM2G102471	Yes
Ath_circ_FC1980	exon	AT3G14415	zma_circ_000141	exonic	GRMZM5G853854	Yes
Ath_circ_FC1981	exon	AT3G14415	zma_circ_000141	exonic	GRMZM5G853854	Yes
Ath_circ_FC2285	exon	AT3G47470	zma_circ_000243	exonic	GRMZM2G160268	Yes
Ath_circ_FC2373	exon	AT3G54050	zma_circ_000019	exonic	GRMZM2G306732	Yes
Ath_circ_FC2374	exon	AT3G54050	zma_circ_000019	exonic	GRMZM2G306732	Yes
Ath_circ_FC2405	exon	AT3G55800	zma_circ_000209	exonic	GRMZM6G741210	Yes
Ath_circ_FC2557	exon	AT4G05320	zma_circ_000265	exonic	GRMZM2G118637/GRMZM2G419844	Yes
Ath_circ_FC2558	exon	AT4G05320	zma_circ_000265	exonic	GRMZM2G118637/GRMZM2G419844	Yes
Ath_circ_FC3119	exon	AT5G02960	zma_circ_000212	exonic	GRMZM2G084465	Yes
Ath_circ_FC3353	exon	AT5G17770	zma_circ_000213	exonic	GRMZM2G133213	Yes
Ath_circ_FC3354	exon	AT5G17770	zma_circ_000213	exonic	GRMZM2G133213	Yes
Ath_circ_FC3355	exon	AT5G17920	zma_circ_000401	exonic	GRMZM2G057535	Yes
Ath_circ_FC3430	exon	AT5G20620	zma_circ_000265	exonic	GRMZM2G118637/GRMZM2G419844	Yes
Ath_circ_FC3435	exon	AT5G20830	zma_circ_000483	exonic	GRMZM2G152908	Yes
Ath_circ_FC3436	exon	AT5G20830	zma_circ_000483	exonic	GRMZM2G152908	Yes
Ath_circ_FC3573	exon	AT5G35630	zma_circ_000013	exonic	GRMZM2G050514	Yes
Ath_circ_FC3745	exon	AT5G50920	zma_circ_000095	exonic	GRMZM2G009443	Yes
Ath_circ_FC3780	exon	AT5G53170	zma_circ_000482	exonic	GRMZM2G110408	Yes
Ath_circ_FC3802	exon	AT5G54770	zma_circ_000225	exonic	GRMZM2G074097	Yes
Ath_circ_FC3895	exon	AT5G61530	zma_circ_000496	exonic	GRMZM6G300210	Yes
Ath_circ_FC3972	exon	AT5G66060	zma_circ_000247	exonic	GRMZM2G025867	Yes
Ath_circ_FC4872	exon	AT5G54270	zma_circ_000392	exonic	AC207722.2_FG009	Yes
Ath_circ_FC4964	exon	AT5G35630	zma_circ_000013	exonic	GRMZM2G050514	Yes
Ath_circ_FC5051	exon	AT2G42600	zma_circ_000465	exonic	GRMZM2G083841	Yes
Ath_circ_FC5052	exon	AT2G42600	zma_circ_000462	exonic	GRMZM2G083841	Yes
Ath_circ_FC5075	exon	AT4G05320	zma_circ_000265	exonic	GRMZM2G118637/GRMZM2G419844	Yes
Ath_circ_FC5168	exon	AT4G05320	zma_circ_000265	exonic	GRMZM2G118637/GRMZM2G419844	Yes
Ath_circ_FC5453	exon	AT2G21660	zma_circ_000038	exonic	GRMZM2G080603	Yes
Ath_circ_FC5502	exon	AT5G54270	zma_circ_000397	exonic	GRMZM2G057281	Yes
Ath_circ_FC5561	exon	AT1G20340	zma_circ_000336	exonic	GRMZM2G071450	Yes
Ath_circ_FC5697	exon	AT3G52880	zma_circ_000161	exonic	GRMZM2G084881	Yes
Ath_circ_FC5698	exon	AT3G53460	zma_circ_000407	exonic	GRMZM2G158835	Yes
Ath_circ_FC5743	exon	AT4G38970	zma_circ_000084	exonic	GRMZM2G046284	Yes
